# Supplementary material for: Palladium-catalyzed difluorocarbene transfer synthesis of diaryl ketones from iodoarene and arylboronic acid
Source: Royal Society of Chemistry journal article supplement (doi:10.1039/d4qo02405b), 2025-01-01
Supplement: d4qo02405b1.pdf [file d4qo02405b1.pdf]

## Supporting Information

# **Palladium-Catalyzed Difluorocarbene Transfer Synthesis of Diaryl Ketones from Iodoarene and Arylboronic Acid**

Zhiyong Tan,<sup>\*,a</sup> Tingting Chen,<sup>a</sup> Jiayi Shen,<sup>a</sup> Jinbin Zhu,<sup>a</sup> Weihong Zhong,<sup>\*,b</sup> Wei Guo<sup>\*,a</sup>

*<sup>a</sup>Key Laboratory of Organo-Pharmaceutical Chemistry of Jiangxi Province, Gannan Normal University, Ganzhou 341000, China; E-mail: 453759122@qq.com; guoweigw@126.com.*

*<sup>b</sup>Jiangxi University of Chinese Medicine, Nanchang, 330004, P. R. China; E-mail: zhongweihong@jxutcm.edu.cn.*

## Table of Contents

|       |                                                                                       |       |
|-------|---------------------------------------------------------------------------------------|-------|
| SI-§1 | General Information .....                                                             | 3     |
| SI-§2 | General Procedures .....                                                              | 3     |
| SI-§3 | Optimization Tables .....                                                             | 4-9   |
| SI-§4 | Further Synthetic Transformation .....                                                | 10-12 |
| §4a   | Drug synthesis .....                                                                  | 10    |
| §4b   | Experimental procedures for derivatization of ketones .....                           | 11-12 |
| SI-§5 | Mechanism Experiments .....                                                           | 13-17 |
| §5a   | <sup>18</sup> O-Labeling experiment .....                                             | 13    |
| §5b   | CO experiment .....                                                                   | 14    |
| §5c   | Complexation experiments of [Pd( $\pi$ -cinnamyl)Cl] <sub>2</sub> and <b>L1</b> ..... | 14    |
| §5d   | Formation of palladium black .....                                                    | 17    |
| SI-§6 | Preparation of Ligands .....                                                          | 17-20 |
| SI-§7 | Characterization Data and NMR Spectra of Products .....                               | 21-96 |
| SI-§8 | Reference .....                                                                       | 97-98 |

## SI- § 1 General Information

Melting points were determined on an EZ-Melt (Automated melting point apparatus).  $^1\text{H}$  and  $^{13}\text{C}$   $\{^1\text{H}\}$  NMR spectra were recorded on a 400 MHz Varian Unity Plus or Varian Mercury plus spectrometer. The chemical shift ( $\delta$ ) values are reported in parts per million (ppm), and the coupling constants ( $J$ ) are given in Hz. The spectra were recorded using  $\text{CDCl}_3$  or  $\text{D}_2\text{O}$  as a solvent.  $^1\text{H}$  NMR chemical shifts are referenced to tetramethylsilane (TMS) (0 ppm). Chemical shifts are reported in  $\delta$  ppm referenced to an internal TMS standard for  $^1\text{H}$  NMR and  $\text{CDCl}_3$  ( $\delta$  77.1) for  $^{13}\text{C}$   $\{^1\text{H}\}$  NMR. High-resolution mass spectrometry (HRMS) data were collected on a high-resolution mass spectrometer (LCMS-IT-TOF) using electrospray ionization (ESI) mass spectrometry. The product purification was done using silica gel column chromatography. Thin-layer chromatography (TLC) characterization was performed with pre-coated silica gel GF254 (0.2 mm), while column chromatography characterization was performed with silica gel (200-300 mesh).  $^{18}\text{O}$  labeled water was purchased from Aladdin ( $^{18}\text{O}$  purity: 98 atom%). GC-MS spectra were recorded on Shimadzu GCMS-QP2010SE. Oil bath was used as heating source. Unless otherwise stated, all experiments were conducted in a seal tube under Ar atmosphere.

## SI- § 2 General Procedures

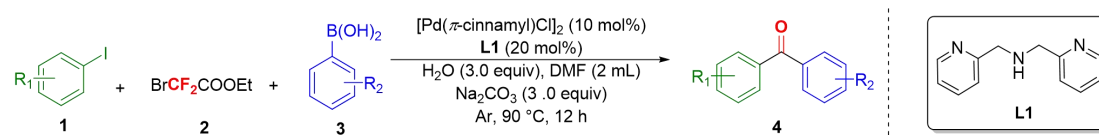

To a 25 mL schlenk tube was added **1** (0.2 mmol, 1.0 equiv) (for liquid aryl iodide, added in a 1 mL syringe after solid), **3** (0.3 mmol, 1.5 equiv),  $[\text{Pd}(\pi\text{-cinnamyl})\text{Cl}]_2$  (10 mol%),  $\text{Na}_2\text{CO}_3$  (0.6 mmol, 3.0 equiv), the tube was evacuated and filled with argon for three cycles. And **2** (0.4 mmol, 2.0 equiv), **L1** (20 mol%), DMF (2 mL) were injected in schlenk tube. The schlenk tube was then heated up to  $90\text{ }^\circ\text{C}$  and kept stirring for 12 hours. After completion of the reaction, the mixture was cooled to room temperature and extracted with EtOAc ( $3 \times 5$  mL). The organic layers were combined and dried with  $\text{Na}_2\text{SO}_4$ . After filtration and evaporation, the crude product was purified and separated by 200-300 mesh silica gel column chromatography to obtain the final product **4**.

### SI- § 3 Optimization Tables

**Table S1.** Optimization of reaction conditions by using different ligands<sup>a</sup>.

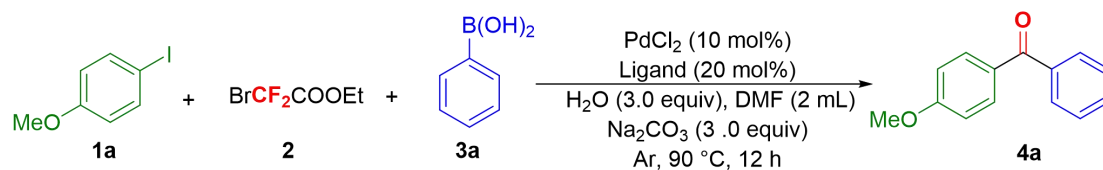

| Entry     | Ligand      | Yield(%) <sup>b</sup> |
|-----------|-------------|-----------------------|
| 1         | <b>P-1</b>  | 36                    |
| 2         | <b>P-2</b>  | 10                    |
| 3         | <b>P-3</b>  | 10                    |
| 4         | <b>P-4</b>  | 17                    |
| 5         | <b>P-5</b>  | 10                    |
| 6         | <b>P-6</b>  | 23                    |
| 7         | <b>P-7</b>  | 20                    |
| 8         | <b>P-8</b>  | 31                    |
| 9         | <b>P-9</b>  | ND                    |
| 10        | <b>P-10</b> | ND                    |
| 11        | <b>P-11</b> | 26                    |
| 12        | <b>N-1</b>  | 10                    |
| 13        | <b>N-2</b>  | 20                    |
| 14        | <b>N-3</b>  | 20                    |
| 15        | <b>N-4</b>  | 35                    |
| 16        | <b>N-5</b>  | 20                    |
| 17        | <b>N-6</b>  | 20                    |
| 18        | <b>N-7</b>  | 36                    |
| 19        | <b>N-8</b>  | 5                     |
| 20        | <b>N-9</b>  | 10                    |
| 21        | <b>N-10</b> | trace                 |
| 22        | <b>N-11</b> | trace                 |
| 23        | <b>N-12</b> | 34                    |
| 24        | <b>N-13</b> | 30                    |
| <b>25</b> | <b>L1</b>   | <b>63</b>             |

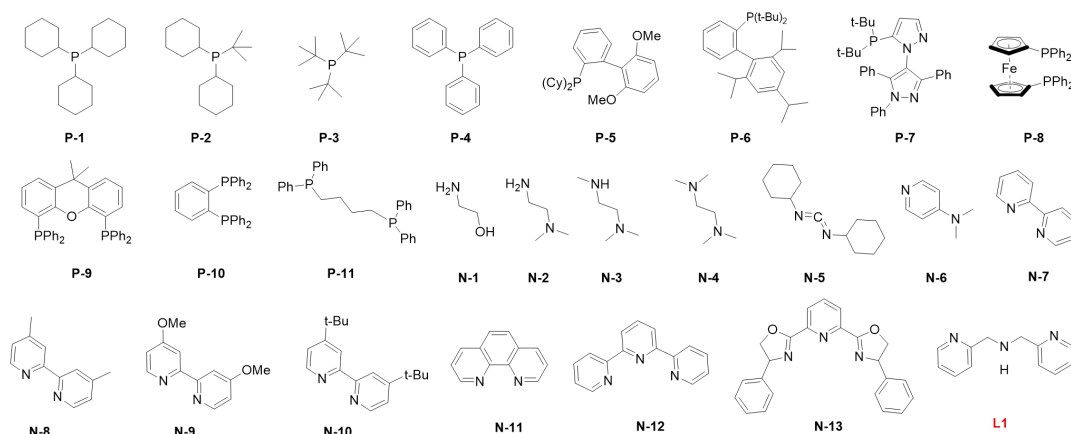

<sup>a</sup> Reaction conditions: **1a** (0.2 mmol, 1.0 equiv), **2** (0.4 mmol, 2.0 equiv), **3a** (0.3 mmol, 1.5 equiv), PdCl<sub>2</sub> (10 mol%), Ligand (20 mol%), H<sub>2</sub>O (0.6 mmol, 3.0 equiv), Na<sub>2</sub>CO<sub>3</sub> (0.6 mmol, 3.0 equiv) in DMF (2 mL), 90 °C, 12 h, in Ar atmosphere. <sup>b</sup> isolated yield.

**Table S2.** Optimization of reaction conditions by using different catalysts<sup>a</sup>.

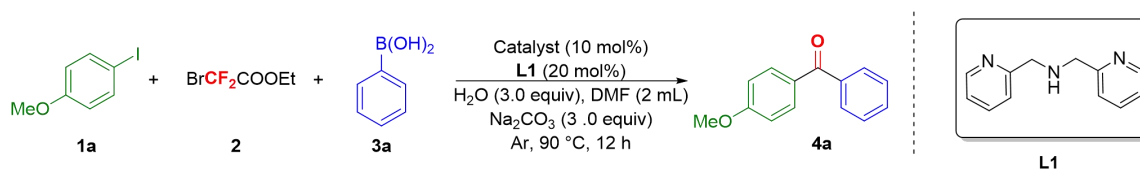

| Entry           | Catalyst                                             | Yield(%) <sup>b</sup> |
|-----------------|------------------------------------------------------|-----------------------|
| 1               | Pd(PPh <sub>3</sub> ) <sub>4</sub>                   | 40                    |
| 2               | Pd(dba) <sub>2</sub>                                 | 59                    |
| <b>3</b>        | <b>[Pd(<math>\pi</math>-cinnamyl)Cl]<sub>2</sub></b> | <b>84</b>             |
| 4               | DPPF-PdCl <sub>2</sub>                               | trace                 |
| 5               | Pd(TFA) <sub>2</sub>                                 | 40                    |
| 6               | Pd(OAc) <sub>2</sub>                                 | 23                    |
| 7               | (CH <sub>3</sub> CN) <sub>2</sub> PdCl <sub>2</sub>  | 50                    |
| 8               | Pd(dba) <sub>3</sub>                                 | 36                    |
| 9               | (PPh <sub>3</sub> ) <sub>2</sub> PdCl <sub>2</sub>   | 5                     |
| 10              | NiCl <sub>2</sub> (pph <sub>3</sub> ) <sub>2</sub>   | ND                    |
| 11              | NiCl <sub>2</sub> (dme)                              | ND                    |
| 12 <sup>c</sup> | [Pd( $\pi$ -cinnamyl)Cl] <sub>2</sub>                | 38                    |
| 13 <sup>d</sup> | [Pd( $\pi$ -cinnamyl)Cl] <sub>2</sub>                | 72                    |

<sup>a</sup> Reaction conditions: **1a** (0.2 mmol, 1.0 equiv), **2** (0.4 mmol, 2.0 equiv), **3a** (0.3 mmol, 1.5 equiv), Catalyst (10 mol%), **L1** (20 mol%), H<sub>2</sub>O (0.6 mmol, 3.0 equiv), Na<sub>2</sub>CO<sub>3</sub> (0.6 mmol, 3.0 equiv) in DMF (2 mL), 90 °C, 12 h, in Ar atmosphere. <sup>b</sup> isolated yield. <sup>c</sup> [Pd( $\pi$ -cinnamyl)Cl]<sub>2</sub> (5 mol%). <sup>d</sup> [Pd( $\pi$ -cinnamyl)Cl]<sub>2</sub> (5 mol%), **L1**(10 mol%).

**Table S3.** Optimization of reaction conditions by using different ligands<sup>a</sup>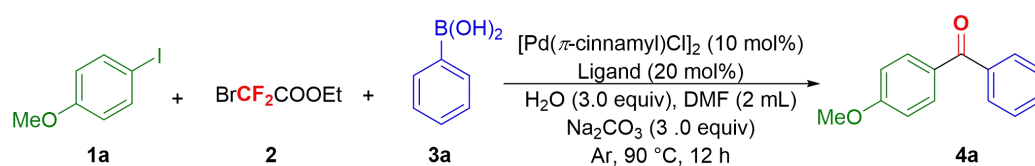

| Entry | Ligand    | Yield(%) <sup>b</sup> |
|-------|-----------|-----------------------|
| 1     | <b>L2</b> | 70                    |
| 2     | <b>L3</b> | 74                    |
| 3     | <b>L4</b> | 69                    |
| 4     | <b>L5</b> | 63                    |

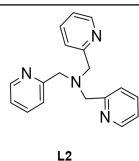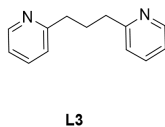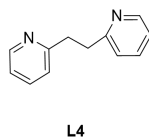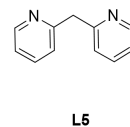

<sup>a</sup> Reaction conditions: **1a** (0.2 mmol, 1.0 equiv), **2** (0.4 mmol, 2.0 equiv), **3a** (0.3 mmol, 1.5 equiv),  $[\text{Pd}(\pi\text{-cinnamyl})\text{Cl}]_2$  (10 mol%), Ligand (20 mol%),  $\text{H}_2\text{O}$  (0.6 mmol, 3.0 equiv),  $\text{Na}_2\text{CO}_3$  (0.6 mmol, 3.0 equiv) in DMF (2 mL), 90 °C, 12 h, in Ar atmosphere. <sup>b</sup> isolated yield.

**Table S4.** Optimization of reaction conditions by using different bases<sup>a</sup>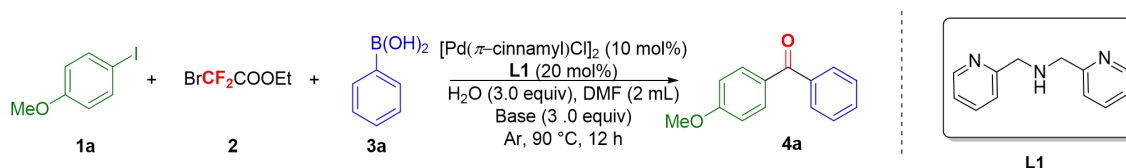

| Entry    | Base                                       | Yield(%) <sup>b</sup> |
|----------|--------------------------------------------|-----------------------|
| <b>1</b> | <b><math>\text{Na}_2\text{CO}_3</math></b> | <b>84</b>             |
| 2        | $\text{K}_2\text{CO}_3$                    | 60                    |
| 3        | $\text{K}_3\text{PO}_4$                    | 16                    |
| 4        | HCOONa                                     | trace                 |
| 5        | DBU                                        | 13                    |
| 6        | DIPEA                                      | 22                    |
| 7        | $\text{Et}_3\text{N}$                      | trace                 |

<sup>a</sup> Reaction conditions: **1a** (0.2 mmol, 1.0 equiv), **2** (0.4 mmol, 2.0 equiv), **3a** (0.3 mmol, 1.5 equiv),  $[\text{Pd}(\pi\text{-cinnamyl})\text{Cl}]_2$  (10 mol%), **L1** (20 mol%),  $\text{H}_2\text{O}$  (0.6 mmol, 3.0 equiv), Base (0.6 mmol, 3.0 equiv) in DMF (2 mL), 90 °C, 12 h, in Ar atmosphere. <sup>b</sup> isolated yield.

**Table S5.** Optimization of reaction conditions by using different solvents<sup>a</sup>.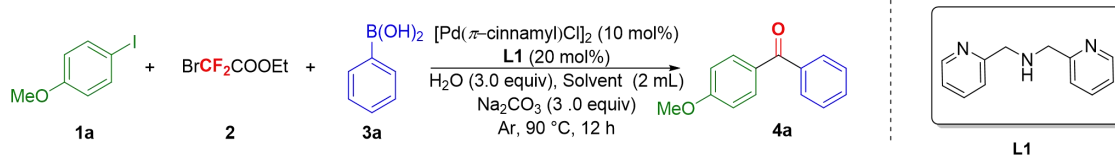

| Entry    | Solvent          | Yield(%) <sup>b</sup> |
|----------|------------------|-----------------------|
| <b>1</b> | <b>DMF</b>       | <b>84</b>             |
| 2        | DMSO             | trace                 |
| 3        | Toluene          | NR                    |
| 4        | 1,4-Dioxane      | 5                     |
| 5        | NMP              | 45                    |
| 6        | DMAc             | 24                    |
| 7        | H <sub>2</sub> O | ND                    |

<sup>a</sup> Reaction conditions: **1a** (0.2 mmol, 1.0 equiv), **2** (0.4 mmol, 2.0 equiv), **3a** (0.3 mmol, 1.5 equiv),  $[\text{Pd}(\pi\text{-cinnamyl})\text{Cl}]_2$  (10 mol%), **L1** (20 mol%),  $\text{H}_2\text{O}$  (0.6 mmol, 3.0 equiv),  $\text{Na}_2\text{CO}_3$  (0.6 mmol, 3.0 equiv) in various solvent (2 mL), 90 °C, 12 h, in Ar atmosphere. <sup>b</sup> isolated yield.

**Table S6.** Optimization of reaction conditions by using different difluorocarbene precursors<sup>a</sup>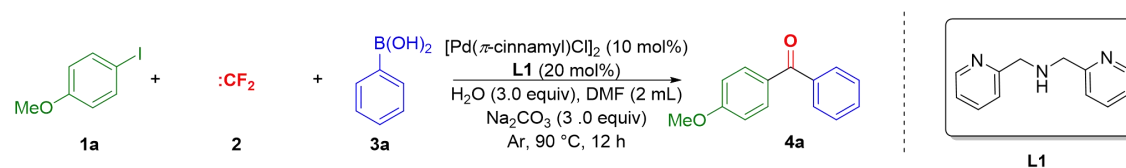

| Entry    | Difluorocarbene precursor                           | Yield(%) <sup>b</sup> |
|----------|-----------------------------------------------------|-----------------------|
| <b>1</b> | <b>BrCF<sub>2</sub>COOEt</b>                        | <b>84</b>             |
| 2        | ClCF <sub>2</sub> COOEt                             | 59                    |
| 3        | BrCF <sub>2</sub> PO(OEt) <sub>2</sub>              | 16                    |
| 4        | BrCF <sub>2</sub> COONa                             | 74                    |
| 5        | ClCF <sub>2</sub> COONa                             | 52                    |
| 6        | TMSCF <sub>2</sub> Br                               | 10                    |
| 7        | Ph <sub>3</sub> P+CF <sub>2</sub> CO <sub>2</sub> - | trace                 |
| 8        | /                                                   | ND                    |

<sup>a</sup> Reaction conditions: **1a** (0.2 mmol, 1.0 equiv), **2** (0.4 mmol, 2.0 equiv), **3a** (0.3 mmol, 1.5 equiv),  $[\text{Pd}(\pi\text{-cinnamyl})\text{Cl}]_2$  (10 mol%), **L1** (20 mol%),  $\text{H}_2\text{O}$  (0.6 mmol, 3.0 equiv),  $\text{Na}_2\text{CO}_3$  (0.6 mmol, 3.0 equiv) in DMF (2 mL), 90 °C, 12 h, in Ar atmosphere. <sup>b</sup> isolated yield.

**Table S7.** Optimization of reaction conditions by using different temperatures<sup>a</sup>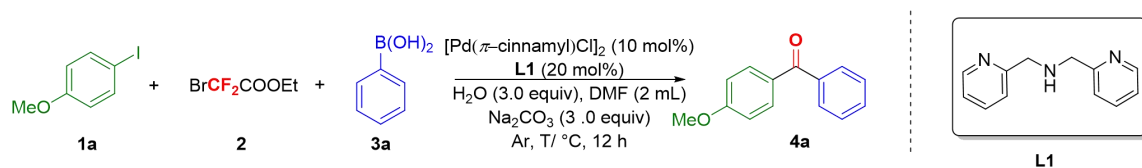

| Entry | Temperature(°C) | Yield(%) <sup>b</sup> |
|-------|-----------------|-----------------------|
| 1     | 60              | 43                    |
| 2     | 70              | 64                    |
| 3     | 80              | 70                    |
| 4     | <b>90</b>       | <b>84</b>             |
| 5     | 110             | 66                    |

<sup>a</sup> Reaction conditions: **1a** (0.2 mmol, 1.0 equiv), **2** (0.4 mmol, 2.0 equiv), **3a** (0.3 mmol, 1.5 equiv),  $[\text{Pd}(\pi\text{-cinnamyl})\text{Cl}]_2$  (10 mol%), **L1** (20 mol%),  $\text{H}_2\text{O}$  (0.6 mmol, 3.0 equiv),  $\text{Na}_2\text{CO}_3$  (0.6 mmol, 3.0 equiv) in DMF (2 mL), T / °C, 12 h, in Ar atmosphere. <sup>b</sup> isolated yield.

**Table S8.** Optimization of reaction conditions by using different times<sup>a</sup>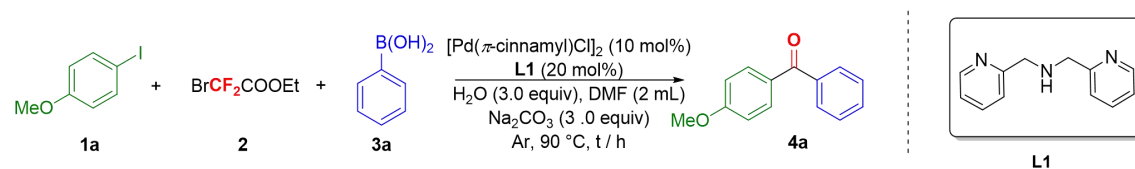

| Entry | Time (h)  | Yield(%) <sup>b</sup> |
|-------|-----------|-----------------------|
| 1     | 4         | 69                    |
| 2     | 6         | 58                    |
| 3     | 8         | 64                    |
| 4     | 10        | 60                    |
| 5     | <b>12</b> | <b>84</b>             |
| 6     | 14        | 83                    |

<sup>a</sup> Reaction conditions: **1a** (0.2 mmol, 1.0 equiv), **2** (0.4 mmol, 2.0 equiv), **3a** (0.3 mmol, 1.5 equiv),  $[\text{Pd}(\pi\text{-cinnamyl})\text{Cl}]_2$  (10 mol%), **L1** (20 mol%),  $\text{H}_2\text{O}$  (0.6 mmol, 3.0 equiv),  $\text{Na}_2\text{CO}_3$  (0.6 mmol, 3.0 equiv) in DMF (2 mL), 90 °C, t / h, in Ar atmosphere. <sup>b</sup> isolated yield.

**Table S9.** Optimization of reaction conditions by using different amount of  $\text{H}_2\text{O}$ <sup>a</sup>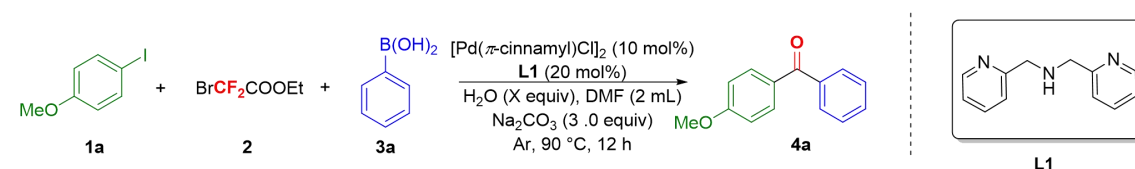

| Entry | $\text{H}_2\text{O}$ (equiv) | Yield(%) <sup>b</sup> |
|-------|------------------------------|-----------------------|
| 1     | 1                            | 60                    |
| 2     | 2                            | 73                    |
| 3     | <b>3</b>                     | <b>84</b>             |



|   |   |    |
|---|---|----|
| 4 | 4 | 83 |
| 5 | 5 | 80 |

<sup>a</sup> Reaction conditions: **1a** (0.2 mmol, 1.0 equiv), **2** (0.4 mmol, 2.0 equiv), **3a** (0.3 mmol, 1.5 equiv), [Pd( $\pi$ -cinnamyl)Cl]<sub>2</sub> (10 mol%), **L1** (20 mol%), H<sub>2</sub>O (X equiv), Na<sub>2</sub>CO<sub>3</sub> (0.6 mmol, 3.0 equiv) in DMF (2 mL), 90 °C, 12 h, in Ar atmosphere. <sup>b</sup> isolated yield.

**Table S10.** Optimization of reaction conditions by using different amount of BrCF<sub>2</sub>COOEt<sup>a</sup>

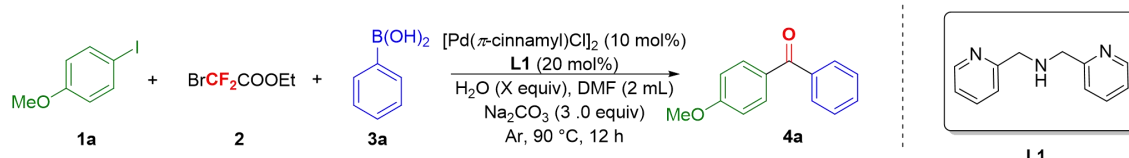

| Entry    | BrCF <sub>2</sub> COOEt (equiv) | Yield(%) <sup>b</sup> |
|----------|---------------------------------|-----------------------|
| 1        | 1.8                             | 80                    |
| 2        | 1.9                             | 82                    |
| <b>3</b> | <b>2</b>                        | <b>84</b>             |
| 4        | 2.1                             | 84                    |
| 5        | 2.2                             | 84                    |

<sup>a</sup> Reaction conditions: **1a** (0.2 mmol, 1.0 equiv), **2** (X equiv), **3a** (0.3 mmol, 1.5 equiv), [Pd( $\pi$ -cinnamyl)Cl]<sub>2</sub> (10 mol%), **L1** (20 mol%), H<sub>2</sub>O (X equiv), Na<sub>2</sub>CO<sub>3</sub> (0.6 mmol, 3.0 equiv) in DMF (2 mL), 90 °C, 12 h, in Ar atmosphere. <sup>b</sup> isolated yield.

**Table S11.** Optimization of reaction conditions by using different amount of phenylboronic acid<sup>a</sup>

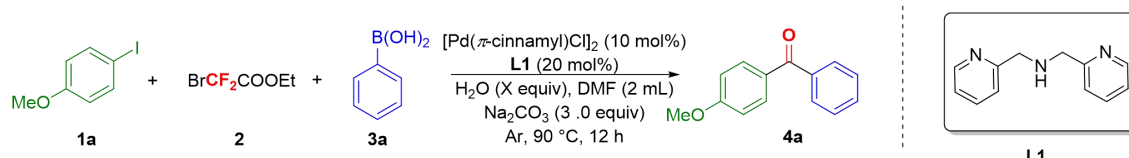

| Entry    | <b>3a</b> (equiv) | Yield(%) <sup>b</sup> |
|----------|-------------------|-----------------------|
| 1        | 1.3               | 74                    |
| 2        | 1.4               | 78                    |
| <b>3</b> | <b>1.5</b>        | <b>84</b>             |
| 4        | 1.6               | 84                    |
| 5        | 1.7               | 84                    |

<sup>a</sup> Reaction conditions: **1a** (0.2 mmol, 1.0 equiv), **2** (0.4 mmol, 2.0 equiv), **3a** (X equiv), [Pd( $\pi$ -cinnamyl)Cl]<sub>2</sub> (10 mol%), **L1** (20 mol%), H<sub>2</sub>O (X equiv), Na<sub>2</sub>CO<sub>3</sub> (0.6 mmol, 3.0 equiv) in DMF (2 mL), 90 °C, 12 h, in Ar atmosphere. <sup>b</sup> isolated yield.

## SI- § 4 Further Synthetic Transformation

### § 4a Drug synthesis

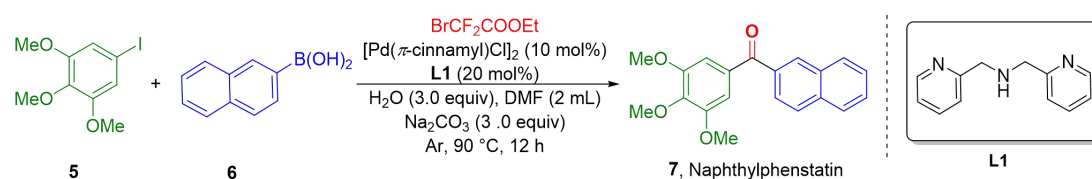

To a 25 mL schlenk tube was added 5-iodo-1,2,3-trimethoxybenzene (0.2 mmol, 1.0 equiv), naphthalen-2-ylboronic acid (0.3 mmol, 1.5 equiv),  $[\text{Pd}(\pi\text{-cinnamyl)Cl}]_2$  (10 mol%),  $\text{Na}_2\text{CO}_3$  (0.6 mmol, 3.0 equiv), the tube was evacuated and filled with argon for three cycles. And  $\text{BrCF}_2\text{COOEt}$  (0.4 mmol, 2.0 equiv), L1 (20 mol%), DMF (2 mL) were injected in schlenk tube. The schlenk tube was then heated up to 90 °C and kept stirring for 12 hours. After completion of the reaction, the mixture was cooled to room temperature and extracted with EtOAc (3 × 5 mL). The organic layers were combined and dried with  $\text{Na}_2\text{SO}_4$ . After filtration and evaporation, the crude product was purified and separated by 200-300 mesh silica gel column chromatography to obtain the final product Naphthylphenstatin.

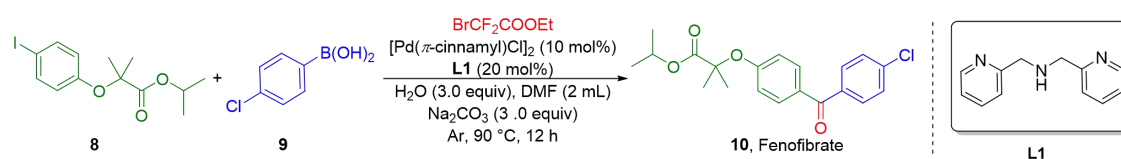

Isopropyl 2-(4-iodophenoxy)-2-methylpropanoate (0.2 mmol, 1.0 equiv), (4-chlorophenyl)boronic acid (0.3 mmol, 1.5 equiv),  $[\text{Pd}(\pi\text{-cinnamyl)Cl}]_2$  (10 mol%),  $\text{Na}_2\text{CO}_3$  (0.6 mmol, 3.0 equiv), the tube was evacuated and filled with argon for three cycles. And  $\text{BrCF}_2\text{COOEt}$  (0.4 mmol, 2.0 equiv), L1 (20 mol%), DMF (2 mL) were injected in schlenk tube. The schlenk tube was then heated up to 90 °C and kept stirring for 12 hours. After completion of the reaction, the mixture was cooled to room temperature and extracted with EtOAc (3 × 5 mL). The organic layers were combined and dried with  $\text{Na}_2\text{SO}_4$ . After filtration and evaporation, the crude product was purified and separated by 200-300 mesh silica gel column chromatography to obtain the final product Fenofibrate.

#### § 4b Experimental procedures for derivatization of ketones

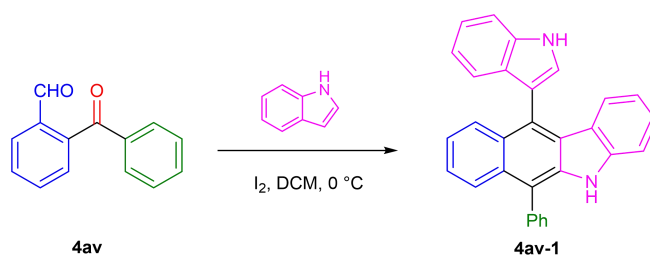

2-benzoyl benzaldehyde (0.25 mmol, 1.0 equiv), CH<sub>2</sub>Cl<sub>2</sub> (2 mL) and I<sub>2</sub> (0.05 mmol, 20 mol%) were added to a 25 mL reaction tube. After cooling the reaction tube to 0 °C in an ice bath, indole (0.525 mmol, 2.1 equiv) and CH<sub>2</sub>Cl<sub>2</sub> (3 mL) were added drip. The reaction mixture was stirred at 0 °C. Upon completion of the reaction, the reaction mixture was transferred to a separating funnel using CH<sub>2</sub>Cl<sub>2</sub> (15 mL), the organic layers was extracted, and dried with sodium sulfate. The solvent was removed using a rotary evaporator at low pressure, and the crude product was purified by silica gel column chromatography using an ethyl acetate/hexane mixture as eluent.

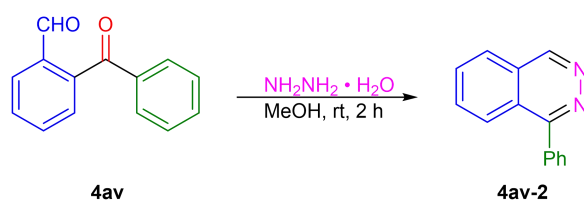

To a solution of the 2-benzoyl benzaldehyde (0.2 mmol, 1.0 equiv) in MeOH (1 mL) was added NH<sub>2</sub>NH<sub>2</sub> · H<sub>2</sub>O (0.4 mmol, 2.0 equiv). The reaction mixture was stirred at room temperature for 2 h. Upon completion of the reaction, the solvent was removed using a rotary evaporator at low pressure, and the final product was purified by silica gel column chromatography with 200-300 mesh.

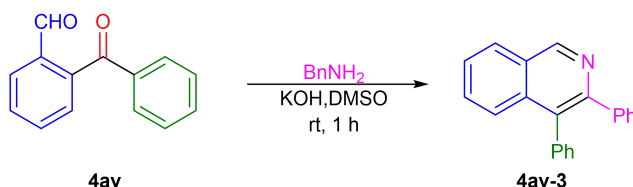

2-benzoyl benzaldehyde (0.2 mmol, 1.0 equiv), benzylamine (0.24 mmol, 1.2 equiv), KOH (0.24 mmol, 1.2 equiv) and DMSO (1 mL) were added to a 15 mL reaction tube. The resulting reaction mixture was stirred at room temperature for 1 h. Upon completion of the reaction, ethyl acetate was added to the mixture, then washed three times with water, and the organic layers were

dried over anhydrous  $\text{Na}_2\text{SO}_4$ . The crude product was filtered, concentrated under vacuum, and purified and separated by 200-300 mesh silica gel column chromatography to obtain the final product.

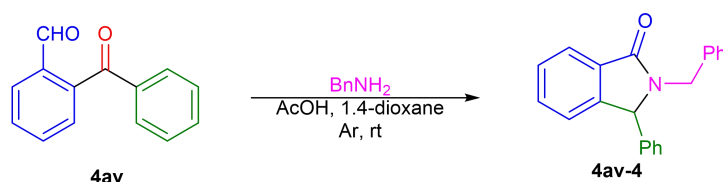

A stirred solution of 2-benzoyl benzaldehyde (0.2 mmol, 1.0 equiv) and  $\text{AcOH}$  (0.46 mmol, 2.3 equiv) in 1,4-dioxane (1 mL) was treated at room temperature with benzylamine (0.4 mmol, 2.0 equiv). After 5 min the reaction mixture was quenched with saturated  $\text{NH}_4\text{Cl}$ . Ethyl acetate extraction reaction mixture, the organic layers were combined with  $\text{Na}_2\text{SO}_4$  and dried. The crude product was filtered and evaporated, and then purified and separated by 200-300 mesh silica gel column chromatography to obtain the final product.

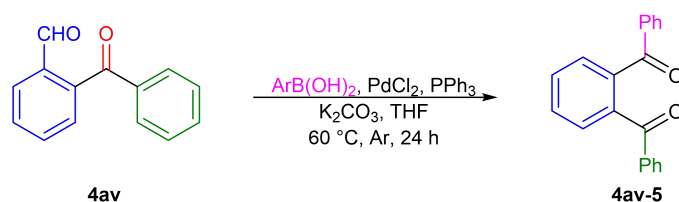

To a 25 mL schlenk tube 2-benzoylbenzaldehyde (0.25 mmol, 1.0 equiv), phenylboronic acid (0.5 mmol, 2.0 equiv),  $\text{PdCl}_2$  (0.025 mmol, 10 mol% ),  $\text{PPh}_3$  (0.0125 mmol, 5 mol% ), and  $\text{K}_2\text{CO}_3$  (0.75 mmol, 3.0 equiv) were sealed with rubber stopper and then purged three times with argon. THF (2.5 mL) was added to the reaction tube with a syringe. The mixture was heated at  $60^\circ\text{C}$  for 24 h. After completion of the reaction, the resulting mixture was cooled to room temperature and  $\text{HCl}$  (4 M, 1 mL) was slowly added. The stirring was continued for 1 h under an argon atmosphere, followed by extraction with ethyl acetate three times. The combined organic extracts were washed with a saturated solution of  $\text{NaHCO}_3$ , with brine and dried over  $\text{Na}_2\text{SO}_4$ . The crude product was filtered and evaporated and then purified and separated by 200-300 mesh silica gel column chromatography to obtain the final product.

## SI- § 5 Mechanism Experiments

### § 5a <sup>18</sup>O-Labeling experiment

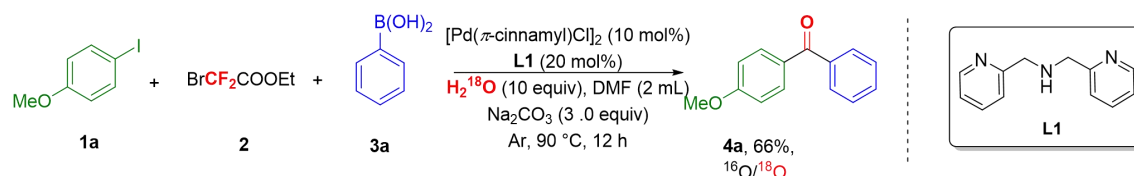

$[\text{Pd}(\pi\text{-cinnamyl})\text{Cl}]_2$  (10 mol%),  $\text{Na}_2\text{CO}_3$  (0.6 mmol, 3.0 equiv), 4-Iodoanisole (0.2 mmol, 1.0 equiv) and Phenylboronic acid (0.3 mmol, 1.5 equiv) were added into an oven-dried schlenk tube equipped with a magnetic stirred bar, then purged three times with argon. And  $\text{BrCF}_2\text{COOEt}$  (0.4 mmol, 2.0 equiv), L1 (20 mol%),  $\text{H}_2^{18}\text{O}$  (2 mmol, 10 equiv), DMF (2 mL) were injected in schlenk tube. The schlenk tube was then heated up to 90 °C and kept stirring for 12 hours. After completion of the reaction, then the mixture was detected by GC-MS.

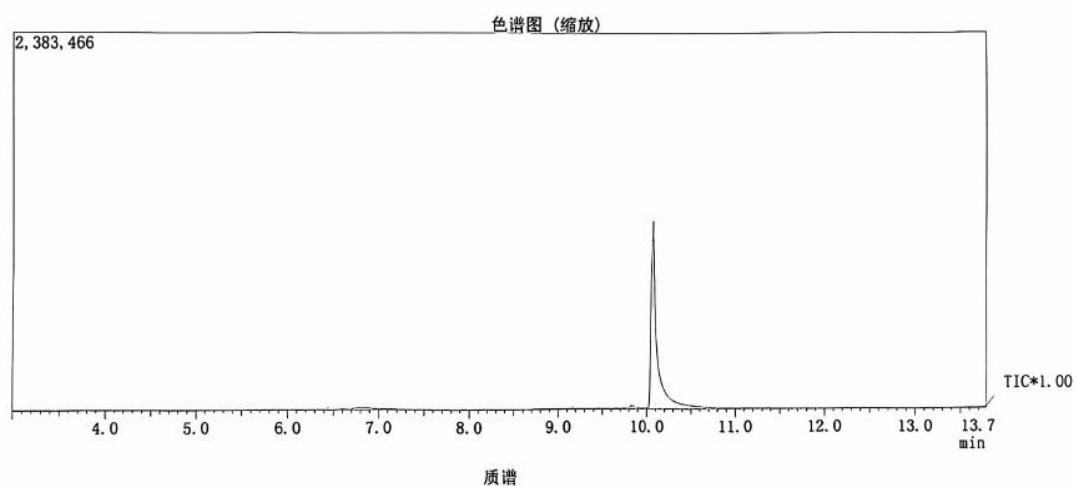

流路号: 1 保留时间: 10.085 (扫描数: 1418)  
质量峰: 425  
原始模式: 单个 10.085 (1418) 基峰: 135.05 (250206)  
背景模式: 无 组 1 - 事件 1 Scan

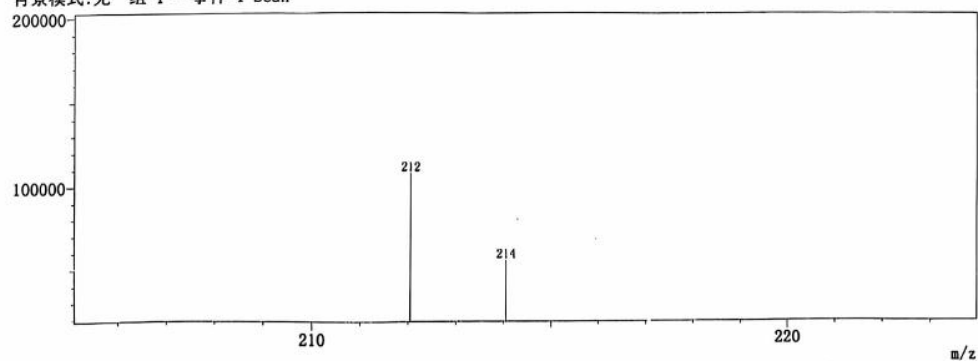

### <sup>18</sup>O-Labeling Experiment

## § 5b CO experiment

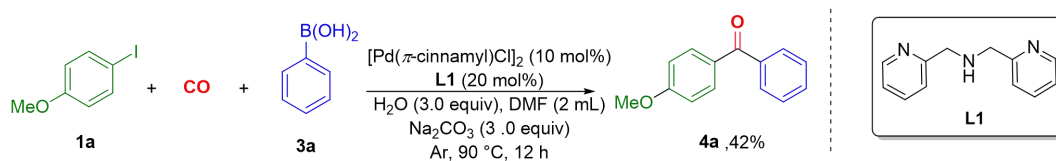

$[\text{Pd}(\pi\text{-cinnamyl})\text{Cl}]_2$  (10 mol%),  $\text{Na}_2\text{CO}_3$  (0.6 mmol, 3.0 equiv), 4-iodoanisole (0.2 mmol, 1.0 equiv) and Phenylboronic acid (0.3 mmol, 1.5 equiv) were added into an oven-dried schlenk tube equipped with a magnetic stirred bar, then purged three times with CO balloon. And **L1** (20 mol%), DMF (2 mL) were injected in schlenk tube. The mixture was continuously reacted at 90 °C for 12 h under CO atmosphere.

## § 5c Complexation experiments of $[\text{Pd}(\pi\text{-cinnamyl})\text{Cl}]_2$ and **L1**

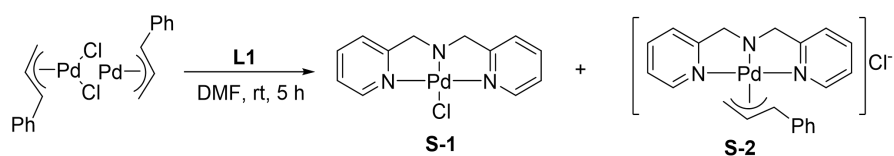

$[\text{Pd}(\pi\text{-cinnamyl})\text{Cl}]_2$  (0.1 mmol, 1.0 equiv), DMF (1 mL) were added to a 10 mL reaction tube and stirred at room temperature for 10 min. The supernatant was centrifuged and transferred to another reaction tube. bis(pyridin-2-ylmethyl)amine (0.2 mmol, 2.0 equiv) was added to this tube, and solid precipitation began about 10 minutes after stirring. The reaction mixture continued to react for 5 h before being filtered and concentrated under reduced pressure. Finally, the upper solid is complex **S-1** and the lower mother liquid is complex **S-2**.

The resulting product **S-1** is a light yellow solid (26.1 mg, 77% yield). mp 286.1 °C.  $^1\text{H}$  NMR (400 MHz, Deuterium Oxide)  $\delta$  8.21 (d,  $J = 5.4$  Hz, 2H), 7.92 (t,  $J = 7.7$  Hz, 2H), 7.51 (d,  $J = 7.9$  Hz, 2H), 7.12 (t,  $J = 6.5$  Hz, 2H), 4.49 (s, 4H).  $^{13}\text{C}$   $\{^1\text{H}\}$  NMR (100 MHz, Acetone)  $\delta$  163.0, 147.4, 139.0, 122.5, 120.2, 56.7.

<sup>1</sup>H-NMR (400 MHz, Deuterium Oxide) of S-1

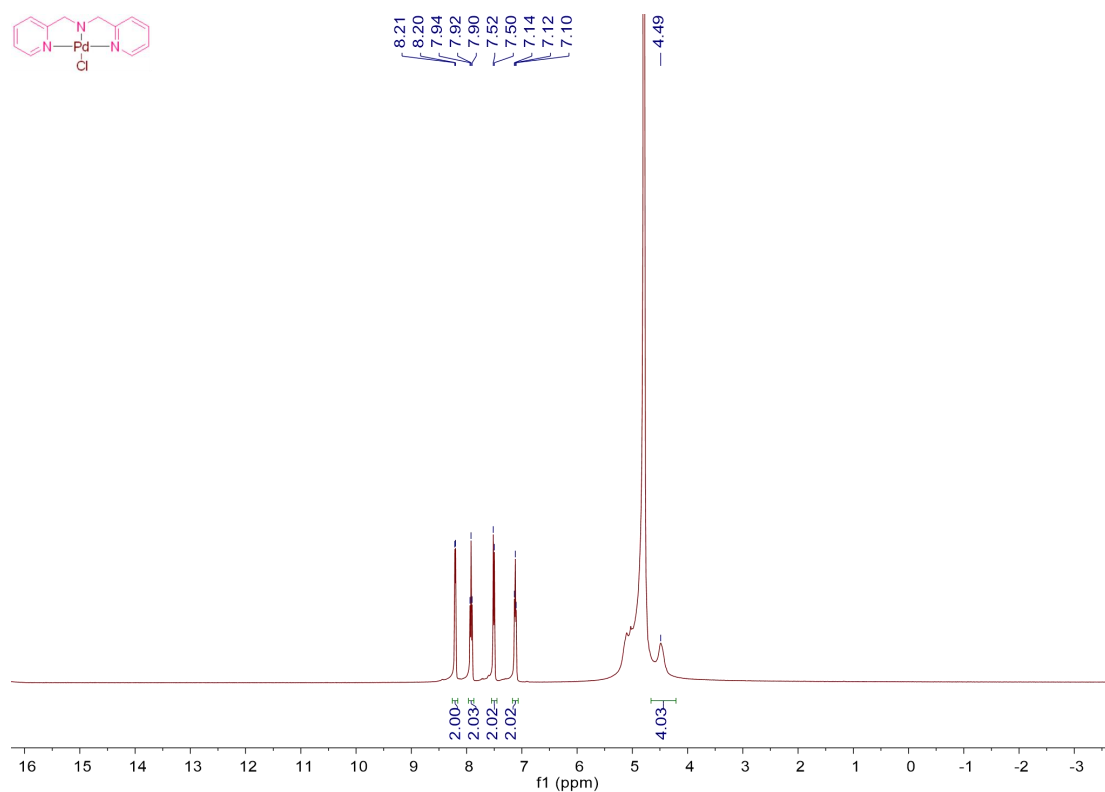

<sup>13</sup>C {<sup>1</sup>H} NMR (100 MHz, Acetone) of S-1

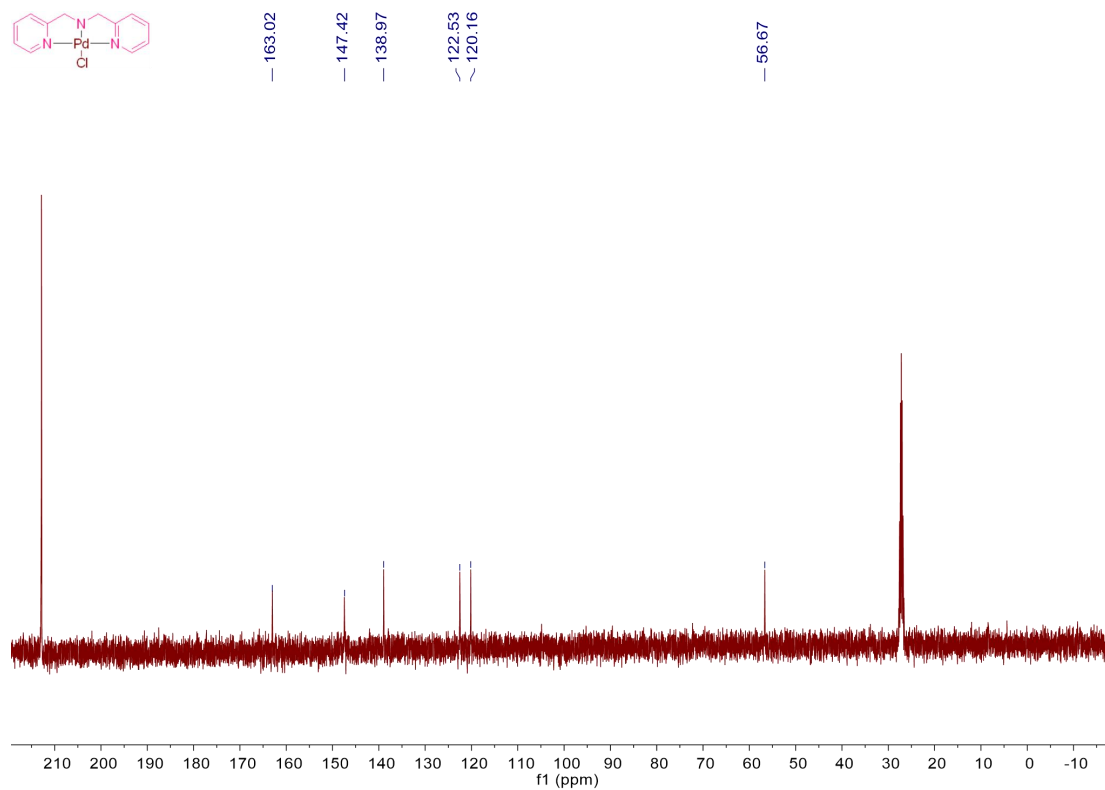

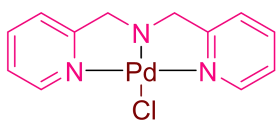

**complex S-1**

HRMS  $m/z$  calculated for  $C_{12}H_{12}ClN_3Pd$   $[M+H]^+$ : 339.98273, found: 339.98302.

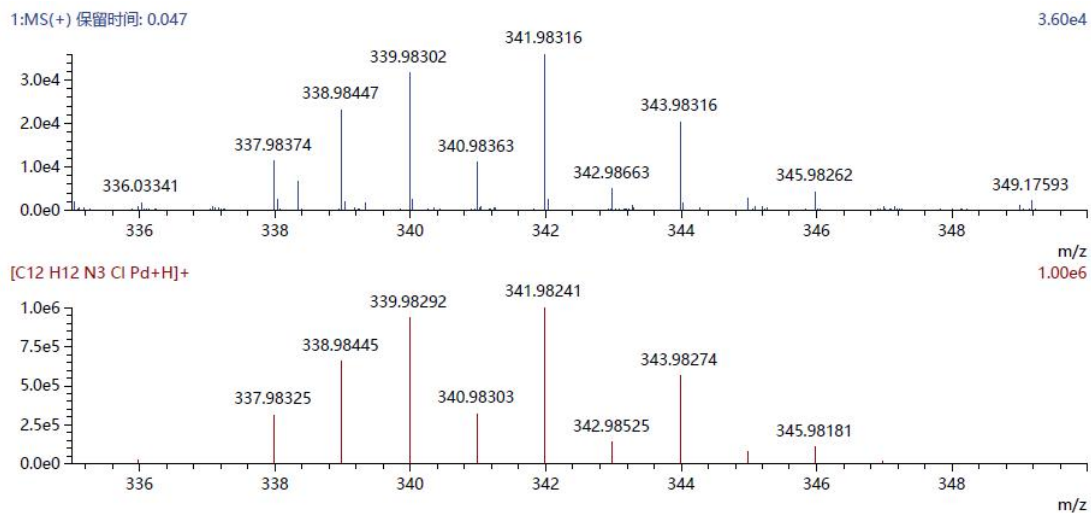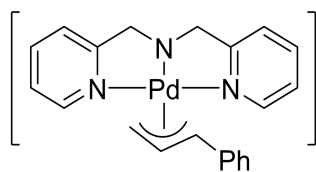

**complex S-2**

HRMS  $m/z$  calculated for  $C_{22}H_{27}N_3Pd$   $[M+H]^+$ : 440.1313, found: 440.1321.

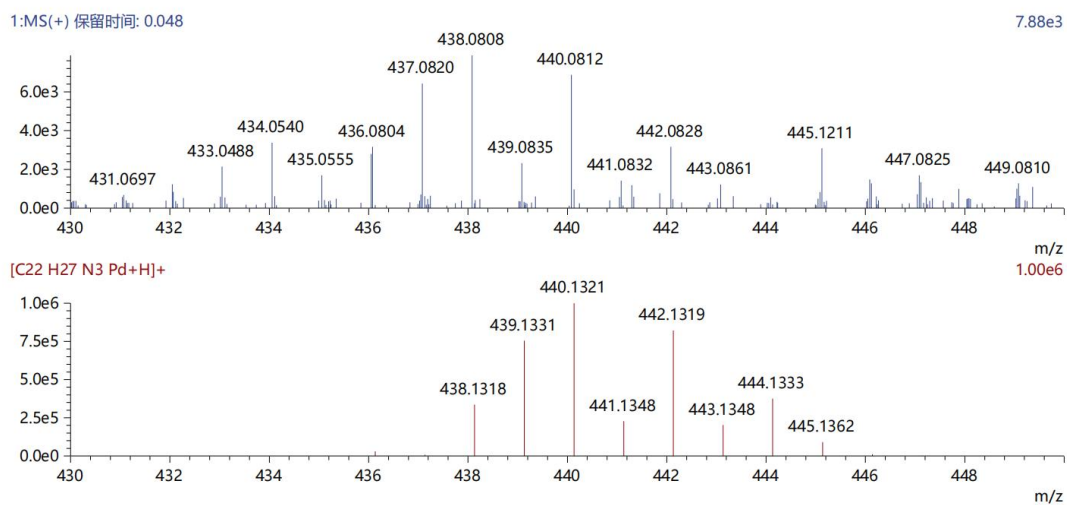



### § 5d Formation of palladium black

[Pd( $\pi$ -cinnamyl)Cl]<sub>2</sub> (10 mol%), Na<sub>2</sub>CO<sub>3</sub> (0.6 mmol, 3.0 equiv) were added into an oven-dried schlenk tube equipped with a magnetic stirred bar, then purged three times with argon. And BrCF<sub>2</sub>COOEt (0.4 mmol, 2.0 equiv), **L1** (20 mol%), DMF (2 mL) were injected in schlenk tube. The schlenk tube was then heated up to 90 °C and kept stirring for 12 hours.

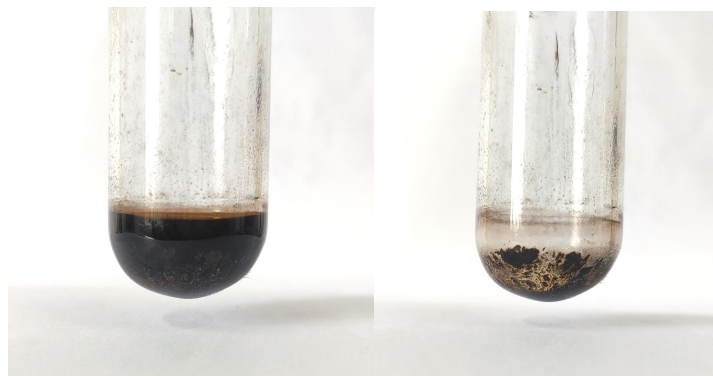

### SI- § 6 Preparation of Ligands

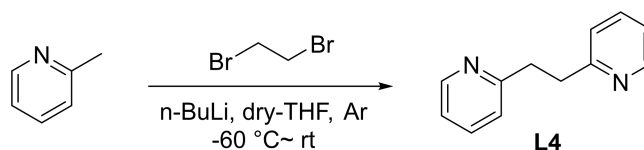

1 mL dry THF and 2.5 M n-butyl lithium (0.6 mmol, 1.2 equiv) in hexane under argon were added to a 15 mL reaction tube. After cooling in an ice bath, 2-methylpyridine (0.5 mmol, 1.0 equiv) was added by slow drops using a syringe. The resulting dark red mixture was then cooled to -60 °C and added 1,2-dibromoethane (0.25 mmol, 0.5 equiv) in 0.1 mL THF. The reaction tube was slowly heated to room temperature when the color of the mixture became lighter. A saturated aqueous solution of KOH (2.2 g KOH in 2 mL H<sub>2</sub>O) was then added. A small amount of brown precipitate was generated, filtered, and then dried with Na<sub>2</sub>SO<sub>4</sub>. After filtration and concentration under reduced pressure, the target product was obtained.

**1,2-di(pyridin-2-yl)ethane (L4).** The residue was purified by column chromatography (Hexane/EtOAc = 1/1) on silica gel and collected as yellow solid (81.0 mg, 88% yield). <sup>1</sup>H NMR (400 MHz, CDCl<sub>3</sub>)  $\delta$  8.46 (d, *J* = 4.0 Hz, 2H), 7.54 – 7.39 (m, 2H), 7.10 – 6.93 (m, 4H), 3.16 (s, 4H). <sup>13</sup>C {<sup>1</sup>H} NMR (100 MHz, CDCl<sub>3</sub>)  $\delta$  161.0, 149.2, 136.3, 123.0, 121.1, 38.1.

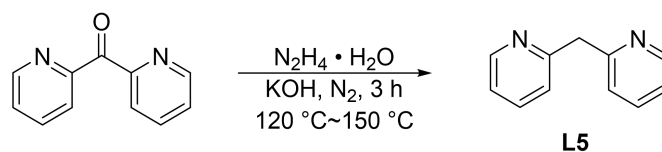

2, 2'-dipyridone (1.0 mmol, 1.0 equiv), KOH (3.5 mmol, 3.5 equiv) were loaded into a 15 mL reaction tube under nitrogen, and 64%  $\text{N}_2\text{H}_4 \cdot \text{H}_2\text{O}$  (37.7 mmol, 37.7 equiv) was added by syringe. While stirring, the reaction was heated to 120 °C to form a yellow solid, which subsequently dissolved during the reaction. The mixture was heated at 120 °C for 1 h and then at 150 °C for 2 h. The reaction mixture was then cooled to room temperature and diluted with  $\text{CH}_2\text{Cl}_2$  : water = 5 mL : 5 mL (v:v). The aquifer was extracted with  $\text{CH}_2\text{Cl}_2$  (3 x 5 mL). The organic layers was combined, washed with water (3x5 mL), dried with anhydrous sodium sulfate, filtered through Celite, and solvent removed under vacuum to give green oil.

**di(pyridin-2-yl)methane (L5).** The residue was purified by column chromatography (Hexane/EtOAc = 1/1) on silica gel and collected as yellow oil (166.6 mg, 98% yield).  $^1\text{H NMR}$  (400 MHz,  $\text{CDCl}_3$ )  $\delta$  8.24 (d,  $J = 4.6$  Hz, 1H), 7.25 (td,  $J = 7.7, 1.5$  Hz, 1H), 6.96 (d,  $J = 7.8$  Hz, 1H), 6.83 – 6.72 (m, 1H), 4.06 (s, 1H).  $^{13}\text{C} \{^1\text{H}\}$  NMR (100 MHz,  $\text{CDCl}_3$ )  $\delta$  159.1, 149.1, 136.3, 123.3, 121.2, 47.0.

$^1\text{H-NMR}$  (400 MHz,  $\text{CDCl}_3$ ) of **L4**

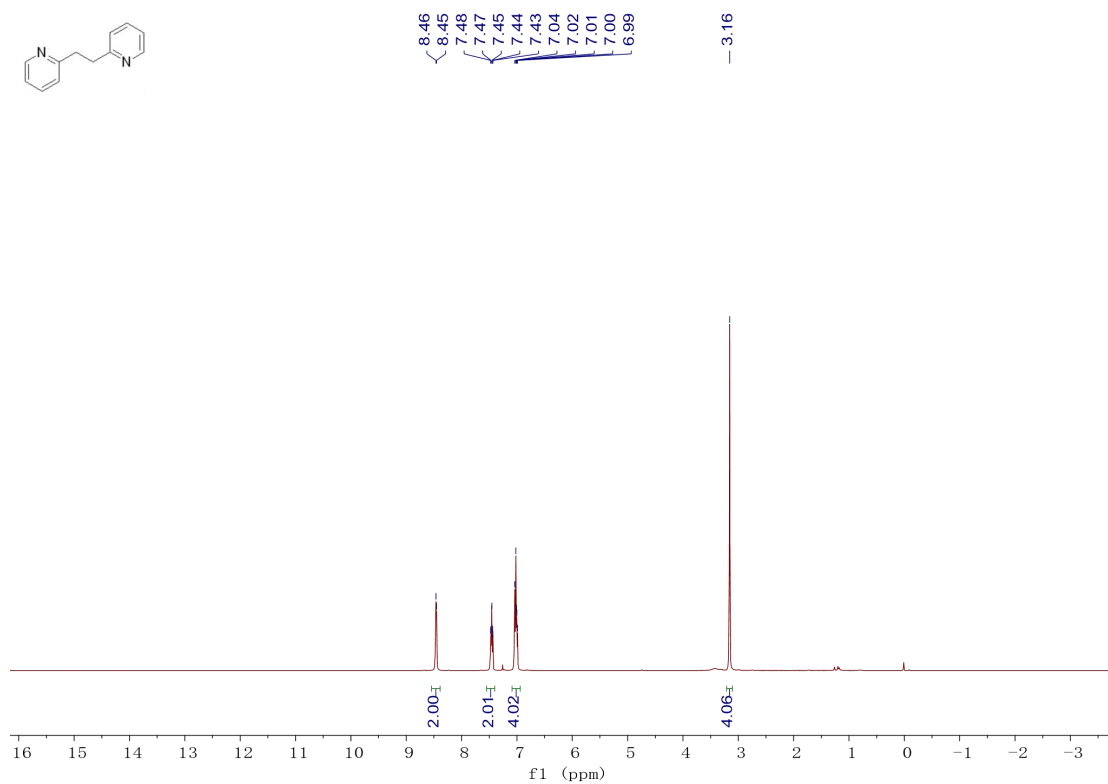

$^{13}\text{C}$   $\{^1\text{H}\}$  NMR (100 MHz,  $\text{CDCl}_3$ ) of **L4**

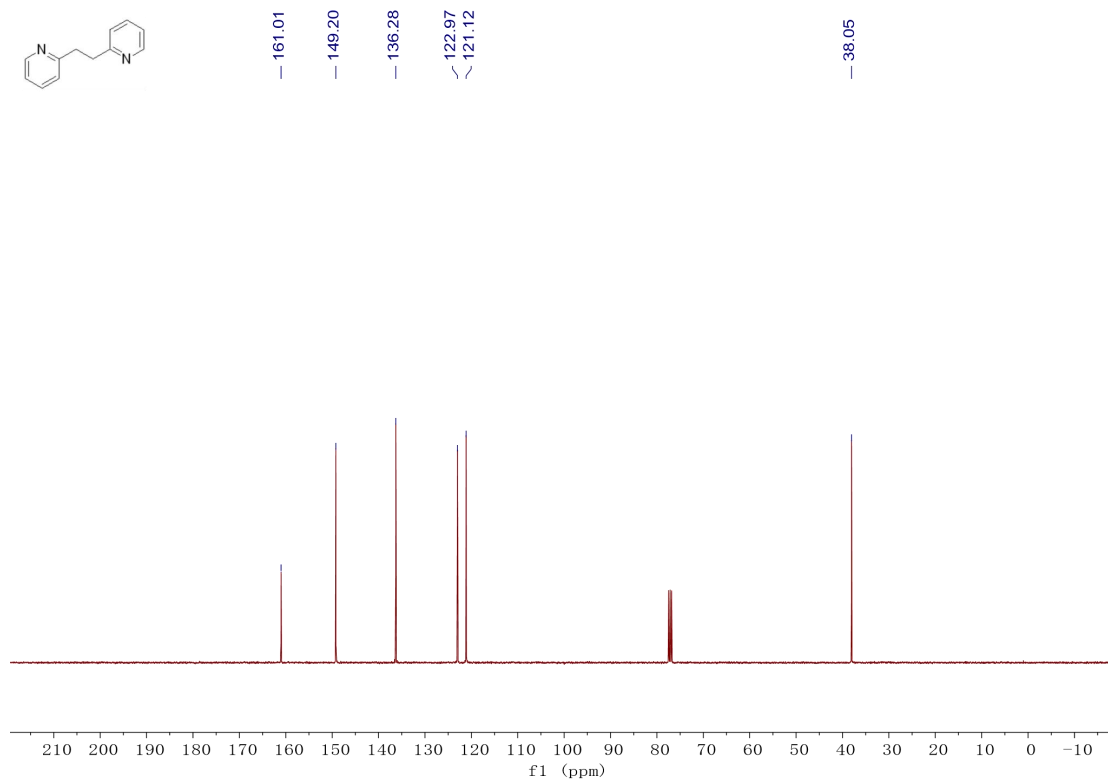

$^1\text{H-NMR}$  (400 MHz,  $\text{CDCl}_3$ ) of **L5**

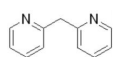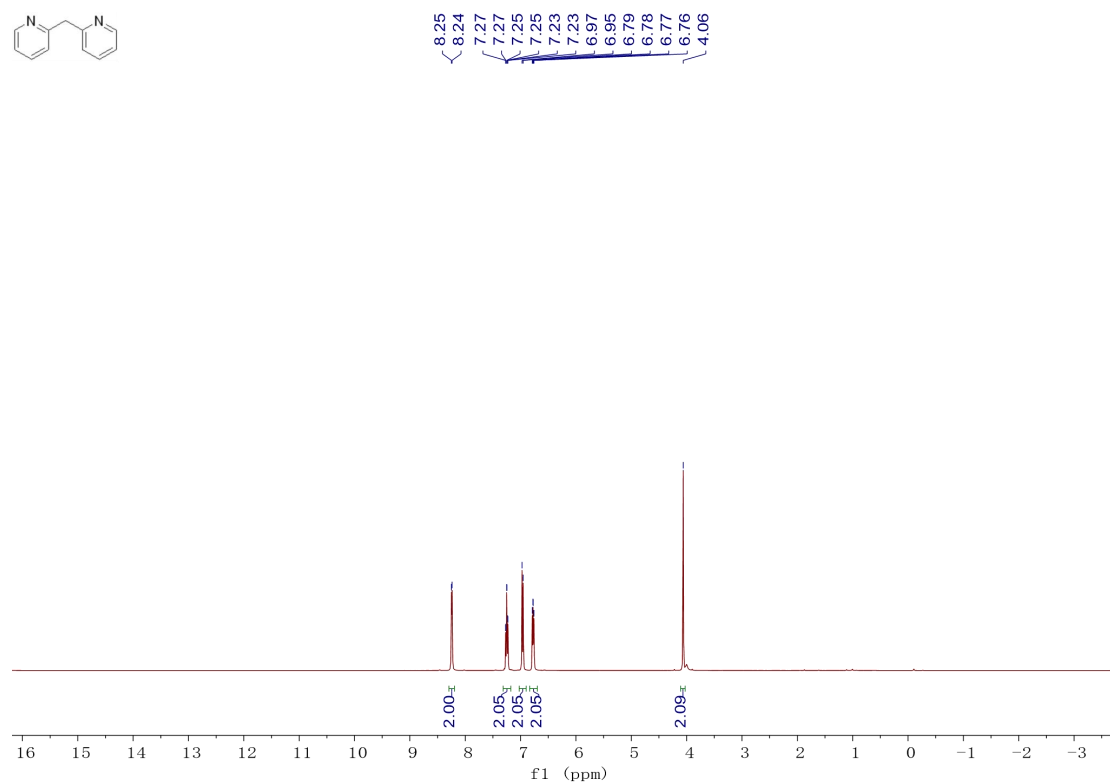

$^{13}\text{C} \{^1\text{H}\}$  NMR (100 MHz,  $\text{CDCl}_3$ ) of **L5**

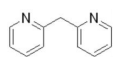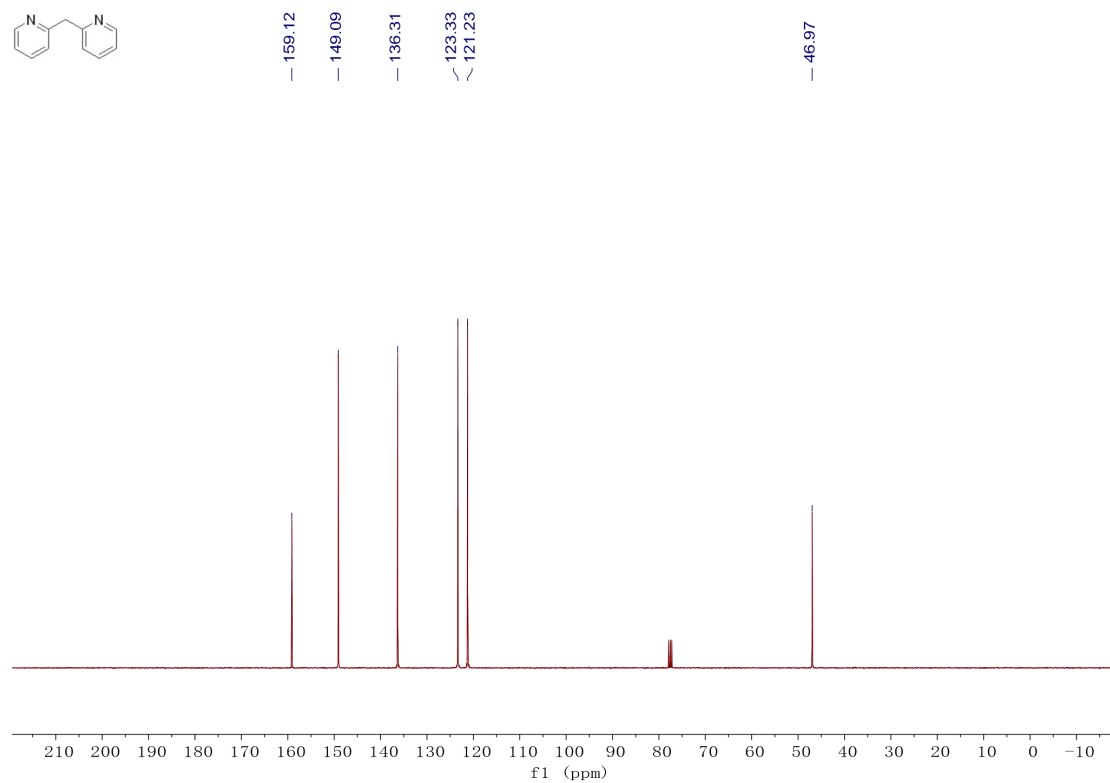

## SI- § 7 Characterization Data and NMR Spectra of Products

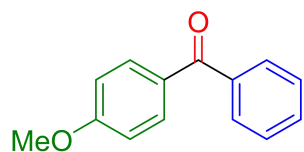

**(4-methoxyphenyl)(phenyl)methanone<sup>1</sup> (4a).** The residue was purified by column chromatography (Hexane/EtOAc = 40/1) on silica gel and collected as yellow oil (35.6 mg, 84% yield). <sup>1</sup>H NMR (400 MHz, CDCl<sub>3</sub>) δ 7.82 (d, *J* = 8.7 Hz, 2H), 7.75 (d, *J* = 7.1 Hz, 2H), 7.56 (t, *J* = 7.3 Hz, 1H), 7.46 (t, *J* = 7.7 Hz, 2H), 6.96 (d, *J* = 8.7 Hz, 2H), 3.87 (s, 3H). <sup>13</sup>C {<sup>1</sup>H} NMR (100 MHz, CDCl<sub>3</sub>) δ 195.6, 163.3, 138.3, 132.6, 131.9, 130.2, 129.7, 128.2, 113.6, 55.5. HRMS *m/z* calculated for C<sub>14</sub>H<sub>12</sub>O<sub>2</sub> [M+H]<sup>+</sup>: 213.0910, found: 213.0901.

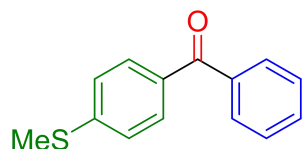

**(4-(methylthio)phenyl)(phenyl)methanone<sup>1</sup> (4b).** The residue was purified by column chromatography (Hexane/EtOAc = 40/1) on silica gel and collected as yellow oil (34.7 mg, 76% yield). <sup>1</sup>H NMR (400 MHz, CDCl<sub>3</sub>) δ 7.78 – 7.72 (m, 4H), 7.62 – 7.53 (m, 1H), 7.51 – 7.42 (m, 2H), 7.28 (d, *J* = 8.5 Hz, 2H), 2.52 (s, 3H). <sup>13</sup>C {<sup>1</sup>H} NMR (100 MHz, CDCl<sub>3</sub>) δ 195.8, 145.3, 137.8, 133.6, 132.2, 130.7, 129.8, 128.3, 124.8, 14.8. HRMS *m/z* calculated for C<sub>14</sub>H<sub>12</sub>OS [M+H]<sup>+</sup>: 229.0682, found: 229.0671.

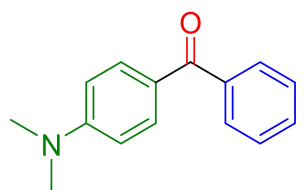

**(4-(dimethylamino)phenyl)(phenyl)methanone<sup>2</sup> (4c).** The residue was purified by column chromatography (Hexane/EtOAc = 25/1) on silica gel and collected as yellow oil (30.2 mg, 67% yield). <sup>1</sup>H NMR (400 MHz, CDCl<sub>3</sub>) δ 7.80 (d, *J* = 9.0 Hz, 2H), 7.72 (d, *J* = 7.1 Hz, 2H), 7.52 (t, *J* = 7.3 Hz, 1H), 7.45 (t, *J* = 7.4 Hz, 2H), 6.67 (d, *J* = 9.0 Hz, 2H), 3.06 (s, 6H). <sup>13</sup>C {<sup>1</sup>H} NMR (100 MHz, CDCl<sub>3</sub>) δ 195.2, 153.3, 139.3, 132.8, 131.1, 129.5, 128.0, 124.7, 110.6, 40.1. HRMS *m/z* calculated for C<sub>15</sub>H<sub>15</sub>NO [M+H]<sup>+</sup>: 226.1226, found: 226.1222.

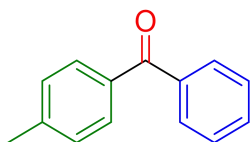

**phenyl(p-tolyl)methanone<sup>2</sup> (4d).** The residue was purified by column chromatography (Hexane) on silica gel and collected as pale yellow oil (28.6 mg, 73% yield). <sup>1</sup>H NMR (400 MHz, CDCl<sub>3</sub>) δ 7.81 – 7.75 (m, 1H), 7.73 (d, *J* = 8.2 Hz, 1H), 7.57 (tt, *J* = 6.8, 1.2 Hz, 1H), 7.47 (t, *J* = 7.5 Hz, 1H), 7.28 (d, *J* = 7.9 Hz, 1H), 2.44 (s, 2H). <sup>13</sup>C {<sup>1</sup>H} NMR (100 MHz, CDCl<sub>3</sub>) δ 196.5, 143.3, 138.0, 134.9, 132.2, 130.3, 129.9, 129.0, 128.2, 21.7. HRMS *m/z* calculated for C<sub>14</sub>H<sub>12</sub>O [M+H]<sup>+</sup>: 197.0961, found: 197.0953.

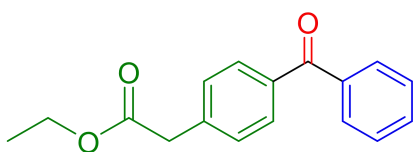

**ethyl 2-(4-benzoylphenyl)acetate<sup>3</sup> (4e).** The residue was purified by column chromatography (Hexane/EtOAc =15/1) on silica gel and collected as colorless oil (42.8 mg, 80% yield). <sup>1</sup>H NMR (400 MHz, CDCl<sub>3</sub>) δ 7.81 – 7.72 (m, 4H), 7.57 (t, *J* = 7.4 Hz, 1H), 7.46 (t, *J* = 7.7 Hz, 2H), 7.40 (d, *J* = 8.1 Hz, 2H), 4.17 (q, *J* = 7.1 Hz, 2H), 3.69 (s, 2H), 1.26 (t, *J* = 7.1 Hz, 3H). <sup>13</sup>C {<sup>1</sup>H} NMR (100 MHz, CDCl<sub>3</sub>) δ 196.3, 170.9, 138.9, 137.6, 136.3, 132.4, 130.4, 130.0, 129.3, 128.3, 61.1, 41.3, 14.2. HRMS *m/z* calculated for C<sub>17</sub>H<sub>16</sub>O<sub>3</sub> [M+H]<sup>+</sup>: 269.1172, found: 269.1167.

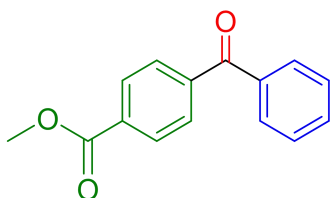

**methyl 4-benzoylbenzoate<sup>4</sup> (4f).** The residue was purified by column chromatography (Hexane/EtOAc =40/1) on silica gel and collected as white solid (30.2 mg, 63% yield). mp 119.7 °C. <sup>1</sup>H NMR (400 MHz, CDCl<sub>3</sub>) δ 8.17 – 8.11 (m, 2H), 7.86 – 7.77 (m, 4H), 7.65 – 7.58 (m, 1H), 7.49 (t, *J* = 7.6 Hz, 2H), 3.96 (s, 3H). <sup>13</sup>C {<sup>1</sup>H} NMR (100 MHz, CDCl<sub>3</sub>) δ 196.0, 166.3, 141.3, 136.9, 133.2, 133.0, 130.1, 129.8, 129.5, 128.5, 52.5. HRMS *m/z* calculated for C<sub>15</sub>H<sub>12</sub>O<sub>3</sub> [M+H]<sup>+</sup>: 241.0859, found: 241.0856.

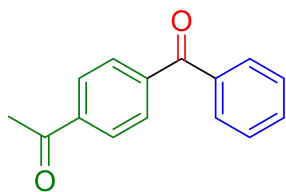

**1-(4-benzoylphenyl)ethan-1-one<sup>5</sup> (4g).** The residue was purified by column chromatography (Hexane/EtOAc =15/1) on silica gel and collected as pale yellow solid (28.7 mg, 64% yield). mp 83.3 °C. <sup>1</sup>H NMR (400 MHz, CDCl<sub>3</sub>) δ 8.04 (d, *J* = 8.4 Hz, 2H), 7.85 (d, *J* = 8.4 Hz, 2H), 7.79 (d, *J* = 7.1 Hz, 2H), 7.61 (t, *J* = 7.4 Hz, 1H), 7.49 (t, *J* = 7.6 Hz, 2H), 2.66 (s, 3H). <sup>13</sup>C {<sup>1</sup>H} NMR (100 MHz, CDCl<sub>3</sub>) δ 197.6, 196.0, 141.3, 139.5, 136.9, 133.0, 130.1, 130.0, 128.5, 128.2, 26.9. HRMS *m/z* calculated for C<sub>15</sub>H<sub>12</sub>O<sub>2</sub> [M+H]<sup>+</sup>: 225.0910, found: 225.0902.

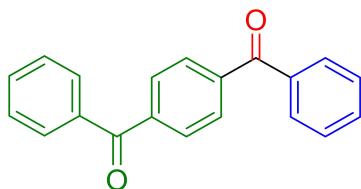

**1,4-phenylenebis(phenylmethanone)<sup>6</sup> (4h).** The residue was purified by column chromatography (Hexane/EtOAc =40/1) on silica gel and collected as pale yellow solid (37.2 mg, 65% yield). mp 154.1 °C. <sup>1</sup>H NMR (400 MHz, CDCl<sub>3</sub>) δ 7.89 (s, 4H), 7.84 (d, *J* = 7.1 Hz, 4H), 7.63 (t, *J* = 7.4 Hz, 2H), 7.51 (t, *J* = 7.6 Hz, 4H). <sup>13</sup>C {<sup>1</sup>H} NMR (100 MHz, CDCl<sub>3</sub>) δ 196.0, 140.7, 136.9, 133.0, 130.1, 129.8, 128.5. HRMS *m/z* calculated for C<sub>20</sub>H<sub>14</sub>O<sub>2</sub> [M+H]<sup>+</sup>: 287.1067, found: 287.1055.

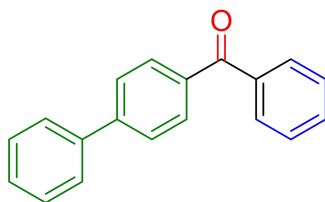

**[1,1'-biphenyl]-4-yl(phenyl)methanone<sup>7</sup> (4i).** The residue was purified by column chromatography (Hexane) on silica gel and collected as yellow solid (39.7 mg, 77% yield). mp 91.5 °C. <sup>1</sup>H NMR (400 MHz, CDCl<sub>3</sub>) δ 7.88 (dd, *J* = 22.9, 7.7 Hz, 4H), 7.69 (dd, *J* = 21.5, 7.7 Hz, 4H), 7.64 – 7.57 (m, 1H), 7.50 (q, *J* = 7.6 Hz, 4H), 7.42 (t, *J* = 7.2 Hz, 1H). <sup>13</sup>C {<sup>1</sup>H} NMR (100 MHz, CDCl<sub>3</sub>) δ 196.4, 145.3, 140.0, 137.8, 136.2, 132.4, 130.8, 130.0, 129.0, 128.3, 128.2, 127.3, 127.0. HRMS *m/z* calculated for C<sub>19</sub>H<sub>14</sub>O [M+H]<sup>+</sup>: 259.1117, found: 259.1114.

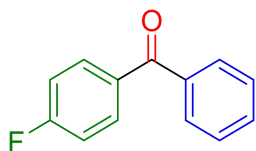

**(4-fluorophenyl)(phenyl)methanone<sup>2</sup> (4j).** The residue was purified by column chromatography (Hexane) on silica gel and collected as white solid (38.8 mg, 97% yield). mp 48.5 °C. <sup>1</sup>H NMR (400 MHz, CDCl<sub>3</sub>) δ 7.89 – 7.81 (m, 2H), 7.80 – 7.74 (m, 2H), 7.59 (t, *J* = 7.4 Hz, 1H), 7.48 (t, *J* = 7.5 Hz, 2H), 7.21 – 7.12 (m, 2H). <sup>13</sup>C {<sup>1</sup>H} NMR (100 MHz, CDCl<sub>3</sub>) δ 195.2, 166.7, 164.1, 137.5, 133.8, 132.7, 132.6, 132.5, 129.9, 128.4, 115.6, 115.3. <sup>19</sup>F NMR (377 MHz, CDCl<sub>3</sub>) δ -105.92 (s) ppm. HRMS *m/z* calculated for C<sub>13</sub>H<sub>9</sub>FO [M+H]<sup>+</sup>: 201.0710, found: 201.0701.

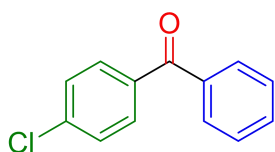

**(4-chlorophenyl)(phenyl)methanone<sup>7</sup> (4k).** The residue was purified by column chromatography (Hexane) on silica gel and collected as white solid (29.4 mg, 68% yield). mp 70.8 °C. <sup>1</sup>H NMR (400 MHz, CDCl<sub>3</sub>) δ 7.76 (t, *J* = 7.3 Hz, 4H), 7.60 (t, *J* = 7.1 Hz, 1H), 7.53 – 7.42 (m, 4H). <sup>13</sup>C {<sup>1</sup>H} NMR (100 MHz, CDCl<sub>3</sub>) δ 195.5, 138.9, 137.2, 135.9, 132.7, 131.5, 129.9, 128.6, 128.4. HRMS *m/z* calculated for C<sub>13</sub>H<sub>9</sub>ClO [M+H]<sup>+</sup>: 217.0415, found: 217.0423.

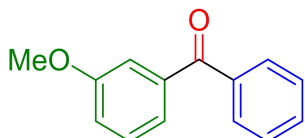

**(3-methoxyphenyl)(phenyl)methanone<sup>2</sup> (4l).** The residue was purified by column chromatography (Hexane/EtOAc =40/1) on silica gel and collected as yellow oil (34.3 mg, 81% yield). <sup>1</sup>H NMR (400 MHz, CDCl<sub>3</sub>) δ 7.83 – 7.78 (m, 2H), 7.58 (t, *J* = 7.4 Hz, 1H), 7.47 (t, *J* = 7.6 Hz, 2H), 7.40 – 7.31 (m, 3H), 7.16 – 7.10 (m, 1H), 3.85 (s, 3H). <sup>13</sup>C {<sup>1</sup>H} NMR (100 MHz, CDCl<sub>3</sub>) δ 196.5, 159.6, 138.9, 137.6, 132.5, 130.0, 129.2, 128.3, 122.9, 118.9, 114.3, 55.5. HRMS *m/z* calculated for C<sub>14</sub>H<sub>12</sub>O<sub>2</sub> [M+H]<sup>+</sup>: 213.0910, found: 213.0905.



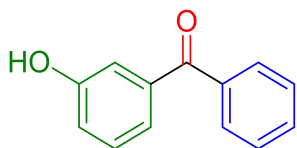

**(3-hydroxyphenyl)(phenyl)methanone<sup>8</sup> (4m).** The residue was purified by column chromatography (Hexane/EtOAc =8/1) on silica gel and collected as yellow oil (17.4 mg, 44% yield). <sup>1</sup>H NMR (400 MHz, CDCl<sub>3</sub>) δ 7.80 (d, *J* = 7.6 Hz, 2H), 7.59 (t, *J* = 7.4 Hz, 1H), 7.47 (t, *J* = 7.6 Hz, 2H), 7.40 (s, 1H), 7.36 – 7.27 (m, 2H), 7.11 (d, *J* = 7.3 Hz, 1H), 6.60 (s, 1H). <sup>13</sup>C {<sup>1</sup>H} NMR (100 MHz, CDCl<sub>3</sub>) δ 197.3, 156.2, 138.8, 137.4, 132.7, 130.2, 129.5, 128.3, 122.8, 120.1, 116.6. HRMS *m/z* calculated for C<sub>13</sub>H<sub>10</sub>O<sub>2</sub> [M+H]<sup>+</sup>: 199.0754, found: 199.0754.

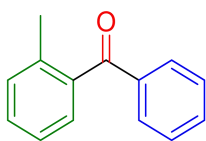

**phenyl(o-tolyl)methanone<sup>7</sup> (4n).** The residue was purified by column chromatography (Hexane) on silica gel and collected as yellow oil (20.4 mg, 52% yield). <sup>1</sup>H NMR (400 MHz, CDCl<sub>3</sub>) δ 7.80 (d, *J* = 7.3 Hz, 2H), 7.58 (t, *J* = 7.4 Hz, 1H), 7.45 (t, *J* = 7.6 Hz, 2H), 7.39 (t, *J* = 7.3 Hz, 1H), 7.30 (t, *J* = 8.5 Hz, 2H), 7.25 (t, *J* = 7.4 Hz, 1H), 2.33 (s, 3H). <sup>13</sup>C {<sup>1</sup>H} NMR (100 MHz, CDCl<sub>3</sub>) δ 198.7, 138.6, 137.7, 136.8, 133.2, 131.0, 130.3, 130.1, 128.5, 128.5, 125.2, 20.0. HRMS *m/z* calculated for C<sub>14</sub>H<sub>12</sub>O [M+H]<sup>+</sup>: 197.0961, found: 197.0959.

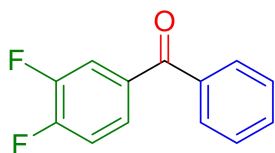

**(3,4-difluorophenyl)(phenyl)methanone<sup>9</sup> (4o).** The residue was purified by column chromatography (Hexane/EtOAc =40/1) on silica gel and collected as pale yellow oil (27.1 mg, 62% yield). <sup>1</sup>H NMR (400 MHz, CDCl<sub>3</sub>) δ 7.85 – 7.76 (m, 2H), 7.75 – 7.67 (m, 1H), 7.67 – 7.58 (m, 2H), 7.53 (t, *J* = 7.7 Hz, 2H), 7.34 – 7.25 (m, 1H). <sup>13</sup>C {<sup>1</sup>H} NMR (100 MHz, CDCl<sub>3</sub>) δ 194.1, 154.6, 154.4, 152.0, 151.9, 151.5, 151.3, 149.0, 148.8, 137.6, 136.9, 134.5, 134.4, 134.4, 132.8, 132.4, 130.1, 129.8, 128.5, 128.3, 127.2, 127.1, 127.1, 127.1, 119.4, 119.4, 119.3, 119.3, 119.2, 119.2, 119.1, 119.1, 117.6, 117.5, 117.4, 117.2. <sup>19</sup>F NMR (377 MHz, CDCl<sub>3</sub>) δ -130.54 (s), 136.14 (s) ppm. HRMS *m/z* calculated for C<sub>13</sub>H<sub>8</sub>F<sub>2</sub>O [M+H]<sup>+</sup>: 219.0616, found: 219.0621.

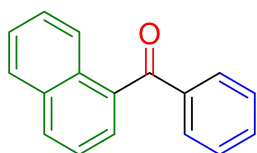

**naphthalen-1-yl(phenyl)methanone<sup>10</sup> (4p).** The residue was purified by column chromatography (Hexane/EtOAc =100/1) on silica gel and collected as colorless oil (35.3 mg, 76% yield). <sup>1</sup>H NMR (400 MHz, CDCl<sub>3</sub>) δ 8.15 (d, *J* = 8.1 Hz, 1H), 8.05 (d, *J* = 8.1 Hz, 1H), 7.97 (d, *J* = 7.8 Hz, 1H), 7.92 (d, *J* = 8.0 Hz, 2H), 7.63 (q, *J* = 7.9 Hz, 2H), 7.60 – 7.46 (m, 5H). <sup>13</sup>C {<sup>1</sup>H} NMR (100 MHz, CDCl<sub>3</sub>) δ 198.1, 138.4, 136.5, 133.8, 133.3, 131.4, 131.1, 130.5, 128.5, 127.9, 127.4, 126.7, 126.6, 125.8, 124.4. HRMS *m/z* calculated for C<sub>17</sub>H<sub>12</sub>O [M+H]<sup>+</sup>: 233.0961, found: 233.0959.

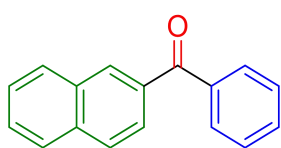

**naphthalen-2-yl(phenyl)methanone<sup>2</sup> (4q).** The residue was purified by column chromatography (Hexane/EtOAc =100/1) on silica gel and collected as white solid (44.1 mg, 95% yield). mp 74.8 °C. <sup>1</sup>H NMR (400 MHz, CDCl<sub>3</sub>) δ 8.27 (s, 1H), 7.97 – 7.89 (m, 4H), 7.87 (d, *J* = 7.3 Hz, 2H), 7.66 – 7.59 (m, 2H), 7.58 – 7.48 (m, 3H). <sup>13</sup>C {<sup>1</sup>H} NMR (100 MHz, CDCl<sub>3</sub>) δ 196.8, 137.9, 135.3, 134.8, 132.4, 132.3, 131.9, 130.1, 129.4, 128.4, 128.3, 127.8, 126.8, 125.8. HRMS *m/z* calculated for C<sub>17</sub>H<sub>12</sub>O [M+H]<sup>+</sup>: 233.0961, found: 233.0966.

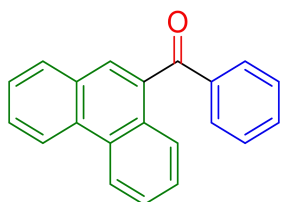

**phenanthren-9-yl(phenyl)methanone<sup>11</sup> (4r).** The residue was purified by column chromatography (Hexane/EtOAc =40/1) on silica gel and collected as pale yellow oil (34.4 mg, 61% yield). <sup>1</sup>H NMR (400 MHz, CDCl<sub>3</sub>) δ 8.76 (dd, *J* = 15.0, 8.3 Hz, 2H), 8.14 (d, *J* = 8.1 Hz, 1H), 7.96 (d, *J* = 7.1 Hz, 2H), 7.92 – 7.84 (m, 2H), 7.81 – 7.68 (m, 2H), 7.67 – 7.56 (m, 3H), 7.48 (t, *J* = 7.7 Hz, 2H). <sup>13</sup>C {<sup>1</sup>H} NMR (100 MHz, CDCl<sub>3</sub>) δ 198.0, 138.2, 135.4, 133.4, 131.3, 130.7, 130.5, 130.1, 129.6, 129.4, 129.2, 128.6, 128.4, 127.3, 127.2, 127.2, 126.7, 123.0, 122.8. HRMS *m/z* calculated for C<sub>21</sub>H<sub>14</sub>O [M+H]<sup>+</sup>: 283.1117, found: 283.1127.

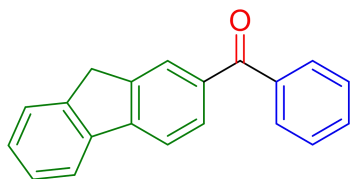

**(9H-fluoren-2-yl)(phenyl)methanone<sup>12</sup> (4s).** The residue was purified by column chromatography (Hexane/EtOAc =40/1) on silica gel and collected as pale yellow solid (43.8 mg, 81% yield). mp 117.9 °C. <sup>1</sup>H NMR (400 MHz, CDCl<sub>3</sub>) δ 8.03 (s, 1H), 7.89 – 7.81 (m, 5H), 7.61 (t, *J* = 7.4 Hz, 2H), 7.51 (t, *J* = 7.5 Hz, 2H), 7.46 – 7.36 (m, 2H), 3.97 (s, 2H). <sup>13</sup>C {<sup>1</sup>H} NMR (100 MHz, CDCl<sub>3</sub>) δ 196.8, 146.0, 144.4, 143.1, 140.6, 138.2, 135.9, 132.2, 130.0, 129.7, 128.3, 128.0, 127.1, 126.9, 125.3, 120.9, 119.4, 36.9. HRMS *m/z* calculated for C<sub>20</sub>H<sub>14</sub>O [M+H]<sup>+</sup>: 271.1117, found: 271.1123.

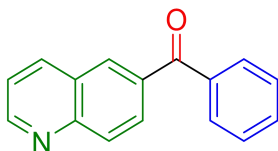

**phenyl(quinolin-6-yl)methanone<sup>13</sup> (4t).** The residue was purified by column chromatography (Hexane/EtOAc =15/1) on silica gel and collected as yellow solid (36.4 mg, 78% yield). mp 56.9 °C. <sup>1</sup>H NMR (400 MHz, CDCl<sub>3</sub>) δ 9.03 (dd, *J* = 4.1, 1.3 Hz, 1H), 8.29 – 8.12 (m, 4H), 7.90 – 7.81 (m, 2H), 7.64 (t, *J* = 7.4 Hz, 1H), 7.57 – 7.46 (m, 2H). <sup>13</sup>C {<sup>1</sup>H} NMR (100 MHz, CDCl<sub>3</sub>) δ 196.1, 152.5, 149.8, 137.4, 135.5, 132.8, 131.4, 130.1, 129.9, 129.5, 128.5, 127.3, 122.1. HRMS *m/z* calculated for C<sub>16</sub>H<sub>11</sub>NO [M+H]<sup>+</sup>: 234.0913, found: 234.0916.

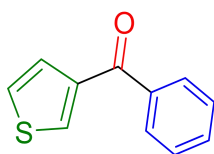

**phenyl(thiophen-3-yl)methanone<sup>12</sup> (4u).** The residue was purified by column chromatography (Hexane/EtOAc =40/1) on silica gel and collected as yellow oil (24.8 mg, 66% yield). <sup>1</sup>H NMR (400 MHz, CDCl<sub>3</sub>) δ 7.93 (d, *J* = 2.5 Hz, 1H), 7.84 (d, *J* = 7.8 Hz, 2H), 7.63 – 7.54 (m, 2H), 7.48 (t, *J* = 7.6 Hz, 2H), 7.38 (dd, *J* = 4.8, 3.0 Hz, 1H). <sup>13</sup>C {<sup>1</sup>H} NMR (100 MHz, CDCl<sub>3</sub>) δ 190.0, 141.3, 138.6, 134.0, 132.3, 129.4, 128.6, 128.4, 126.2. HRMS *m/z* calculated for C<sub>11</sub>H<sub>8</sub>OS [M+H]<sup>+</sup>: 189.0369, found: 189.0365.

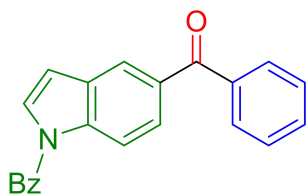

**(1H-indole-1,5-diyl)bis(phenylmethanone) (4v).** The residue was purified by column chromatography (Hexane/EtOAc =15/1) on silica gel and collected as yellow solid (38.4 mg, 59% yield). mp 129.4 °C.  $^1\text{H NMR}$  (400 MHz,  $\text{CDCl}_3$ )  $\delta$  8.46 (d,  $J = 8.6$  Hz, 1H), 8.10 (s, 1H), 7.88 (d,  $J = 8.7$  Hz, 1H), 7.80 (dd,  $J = 27.3, 7.5$  Hz, 4H), 7.70 – 7.46 (m, 6H), 7.41 (d,  $J = 3.7$  Hz, 1H), 6.70 (d,  $J = 3.7$  Hz, 1H).  $^{13}\text{C}$   $\{^1\text{H}\}$  NMR (100 MHz,  $\text{CDCl}_3$ )  $\delta$  196.7, 168.7, 138.4, 138.2, 134.0, 133.4, 132.4, 132.2, 130.4, 130.1, 129.3, 129.0, 128.8, 128.3, 127.0, 123.9, 116.0, 108.9. HRMS  $m/z$  calculated for  $\text{C}_{22}\text{H}_{15}\text{NO}_2$   $[\text{M}+\text{H}]^+$ : 326.1176, found: 326.1179.

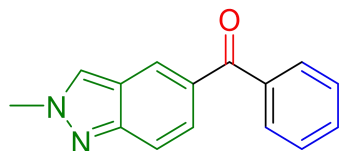

**(2-methyl-2H-indazol-5-yl)(phenyl)methanone (4w).** The residue was purified by column chromatography (Hexane/EtOAc =3/1) on silica gel and collected as yellow solid (30.2 mg, 64% yield). mp 98.6 °C.  $^1\text{H NMR}$  (400 MHz,  $\text{CDCl}_3$ )  $\delta$  8.13 (s, 1H), 8.03 (s, 1H), 7.87 – 7.71 (m, 4H), 7.61 – 7.53 (m, 1H), 7.48 (t,  $J = 7.5$  Hz, 2H), 4.24 (s, 3H).  $^{13}\text{C}$   $\{^1\text{H}\}$  NMR (100 MHz,  $\text{CDCl}_3$ )  $\delta$  196.6, 150.1, 138.4, 132.0, 131.4, 129.8, 128.2, 126.5, 126.4, 126.1, 121.1, 117.4, 40.7. HRMS  $m/z$  calculated for  $\text{C}_{15}\text{H}_{12}\text{N}_2\text{O}$   $[\text{M}+\text{H}]^+$ : 237.1022, found: 237.1034.

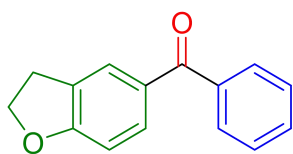

**(2,3-dihydrobenzofuran-5-yl)(phenyl)methanone<sup>13</sup> (4x).** The residue was purified by column chromatography (Hexane/EtOAc =8/1) on silica gel and collected as colorless oil (34.1 mg, 76% yield).  $^1\text{H NMR}$  (400 MHz,  $\text{CDCl}_3$ )  $\delta$  7.79 – 7.70 (m, 3H), 7.68 – 7.60 (m, 1H), 7.55 (t,  $J = 7.4$  Hz, 1H), 7.46 (t,  $J = 7.5$  Hz, 2H), 6.81 (d,  $J = 8.4$  Hz, 1H), 4.66 (t,  $J = 8.8$  Hz, 2H), 3.25 (t,  $J = 8.7$  Hz, 2H).  $^{13}\text{C}$   $\{^1\text{H}\}$  NMR (100 MHz,  $\text{CDCl}_3$ )  $\delta$  195.6, 164.2, 138.6, 132.5, 131.8, 130.4, 129.7, 128.2, 127.6, 127.5, 108.8, 72.2, 29.1. HRMS  $m/z$  calculated for  $\text{C}_{15}\text{H}_{12}\text{O}_2$   $[\text{M}+\text{H}]^+$ : 225.0910, found: 225.0912.

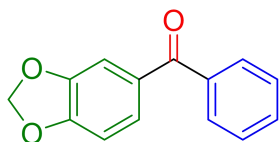

**benzo[d][1,3]dioxol-5-yl(phenyl)methanone<sup>2</sup> (4y).** The residue was purified by column chromatography (Hexane/EtOAc =40/1) on silica gel and collected as pale yellow oil (42.9 mg, 95% yield). <sup>1</sup>H NMR (400 MHz, CDCl<sub>3</sub>) δ 7.73 (d, *J* = 7.9 Hz, 2H), 7.55 (t, *J* = 7.0 Hz, 1H), 7.45 (t, *J* = 7.6 Hz, 2H), 7.36 (d, *J* = 7.5 Hz, 2H), 6.84 (d, *J* = 8.0 Hz, 1H), 6.04 (s, 2H). <sup>13</sup>C {<sup>1</sup>H} NMR (100 MHz, CDCl<sub>3</sub>) δ 195.1, 151.5, 147.9, 138.1, 132.0, 131.9, 129.7, 128.2, 126.9, 109.9, 107.7, 101.9. HRMS *m/z* calculated for C<sub>14</sub>H<sub>10</sub>O<sub>3</sub> [M+H]<sup>+</sup>: 227.0703, found: 227.0702.

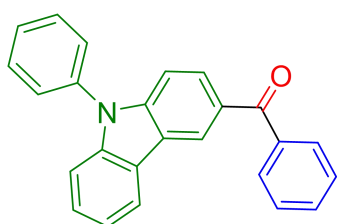

**phenyl(9-phenyl-9H-carbazol-3-yl)methanone (4z).** The residue was purified by column chromatography (Hexane/EtOAc =40/1) on silica gel and collected as white solid (62.5 mg, 90% yield). mp 161.3 °C. <sup>1</sup>H NMR (400 MHz, CDCl<sub>3</sub>) δ 8.68 (s, 1H), 8.17 (d, *J* = 7.7 Hz, 1H), 7.97 (dd, *J* = 8.6, 1.6 Hz, 1H), 7.87 (d, *J* = 7.1 Hz, 2H), 7.69 – 7.56 (m, 5H), 7.53 (t, *J* = 7.5 Hz, 3H), 7.49 – 7.39 (m, 3H), 7.38 – 7.30 (m, 1H). <sup>13</sup>C {<sup>1</sup>H} NMR (100 MHz, CDCl<sub>3</sub>) δ 196.6, 143.4, 141.8, 138.9, 137.0, 131.8, 130.1, 130.0, 129.6, 128.7, 128.2, 128.1, 127.2, 126.8, 123.9, 123.4, 123.0, 120.9, 120.7, 110.3, 109.4. HRMS *m/z* calculated for C<sub>25</sub>H<sub>17</sub>NO [M+H]<sup>+</sup>: 348.1383, found: 348.1397.

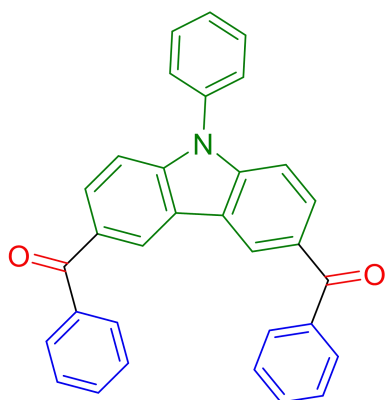

**(9-phenyl-9H-carbazole-3,6-diyl)bis(phenylmethanone) (4aa).** The residue was purified by column chromatography (Hexane/EtOAc =25/1) on silica gel and collected as yellow solid (48.8

mg, 54% yield). mp 191.0 °C.  $^1\text{H NMR}$  (400 MHz,  $\text{CDCl}_3$ )  $\delta$  8.64 (s, 1H), 8.01 (dd,  $J = 8.6, 1.6$  Hz, 2H), 7.85 (d,  $J = 7.1$  Hz, 4H), 7.72 – 7.65 (m, 2H), 7.65 – 7.57 (m, 5H), 7.52 (t,  $J = 7.5$  Hz, 4H), 7.46 (d,  $J = 8.6$  Hz, 2H).  $^{13}\text{C}$   $\{^1\text{H}\}$  NMR (100 MHz,  $\text{CDCl}_3$ )  $\delta$  196.4, 144.2, 138.5, 136.3, 132.1, 130.5, 130.3, 130.0, 129.3, 128.7, 128.3, 127.1, 124.0, 123.0, 110.0. HRMS  $m/z$  calculated for  $\text{C}_{32}\text{H}_{21}\text{O}_2\text{N}$   $[\text{M}+\text{H}]^+$ : 452.1645, found: 452.1657.

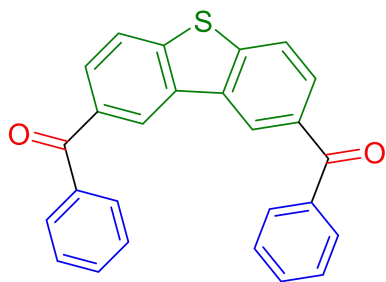

**dibenzo[b,d]thiophene-2,8-diylbis(phenylmethanone) (4ab).** The residue was purified by column chromatography (Hexane/EtOAc =25/1) on silica gel and collected as pale yellow solid (40 mg, 51% yield). mp 187.4 °C.  $^1\text{H NMR}$  (400 MHz,  $\text{CDCl}_3$ )  $\delta$  8.62 (s, 2H), 7.97 (q,  $J = 8.4$  Hz, 4H), 7.85 (d,  $J = 7.4$  Hz, 4H), 7.63 (t,  $J = 7.4$  Hz, 2H), 7.52 (t,  $J = 7.6$  Hz, 4H).  $^{13}\text{C}$   $\{^1\text{H}\}$  NMR (100 MHz,  $\text{CDCl}_3$ )  $\delta$  196.3, 144.2, 137.7, 135.1, 134.6, 132.6, 130.1, 128.8, 128.5, 123.9, 122.8. HRMS  $m/z$  calculated for  $\text{C}_{26}\text{H}_{16}\text{OS}$   $[\text{M}+\text{H}]^+$ : 393.0944, found: 393.0953.

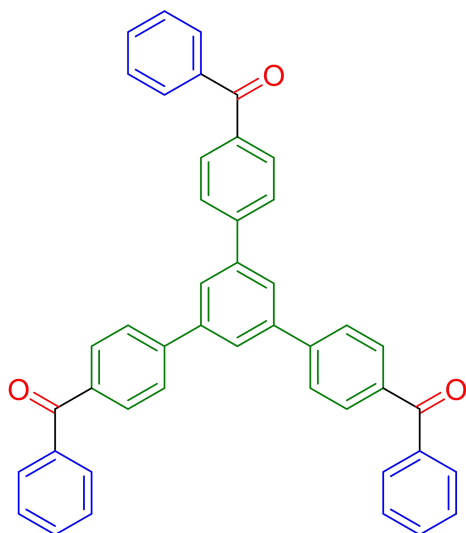

**1,3,5-Tris(4-benzoylphenyl)benzene<sup>23</sup> (4ac).** The residue was purified by column chromatography (Hexane/EtOAc =6/1) on silica gel and collected as yellow solid (51.9 mg, 42% yield). mp 186.1 °C.  $^1\text{H NMR}$  (400 MHz,  $\text{CDCl}_3$ )  $\delta$  7.99 – 7.92 (m, 9H), 7.85 (t,  $J = 8.8$  Hz, 12H), 7.63 (t,  $J = 7.4$  Hz, 3H), 7.52 (t,  $J = 7.6$  Hz, 6H).  $^{13}\text{C}$   $\{^1\text{H}\}$  NMR (100 MHz,  $\text{CDCl}_3$ )  $\delta$  196.2, 144.5, 141.7, 137.6, 136.9, 132.6, 130.9, 130.1, 128.4, 127.2, 126.2. HRMS  $m/z$  calculated for

C<sub>45</sub>H<sub>30</sub>O<sub>3</sub> [M+H]<sup>+</sup>: 619.2268, found: 619.2247.

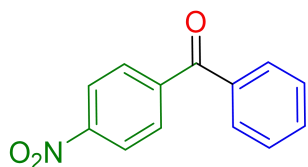

**(4-nitrophenyl)(phenyl)methanone<sup>5</sup> (4ad)**. The residue was purified by column chromatography (Hexane/EtOAc =40/1) on silica gel and collected as yellow solid (15.0 mg, 33% yield). mp 136 °C. <sup>1</sup>H NMR (400 MHz, CDCl<sub>3</sub>) δ 8.32 (d, *J* = 7.5 Hz, 2H), 7.92 (d, *J* = 7.5 Hz, 2H), 7.79 (d, *J* = 6.5 Hz, 2H), 7.69 – 7.60 (m, 1H), 7.58 – 7.46 (m, 2H). <sup>13</sup>C {<sup>1</sup>H} NMR (100 MHz, CDCl<sub>3</sub>) δ 194.8, 149.8, 142.9, 136.3, 133.5, 130.7, 130.1, 128.7, 123.6.

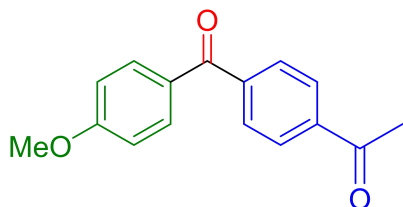

**1-(4-(4-methoxybenzoyl)phenyl)ethan-1-one<sup>14</sup> (4ae)**. The residue was purified by column chromatography (Hexane/EtOAc =25/1) on silica gel and collected as pale yellow solid (41.2 mg, 81% yield). mp 105.2 °C. <sup>1</sup>H NMR (400 MHz, CDCl<sub>3</sub>) δ 8.02 (d, *J* = 8.2 Hz, 2H), 7.79 (dd, *J* = 8.3, 3.2 Hz, 4H), 6.95 (d, *J* = 8.7 Hz, 2H), 3.87 (s, 3H), 2.64 (s, 3H). <sup>13</sup>C {<sup>1</sup>H} NMR (100 MHz, CDCl<sub>3</sub>) δ 197.6, 194.7, 163.6, 142.1, 139.1, 132.6, 129.7, 129.5, 128.1, 113.8, 55.6, 26.9. HRMS *m/z* calculated for C<sub>16</sub>H<sub>14</sub>O<sub>3</sub> [M+H]<sup>+</sup>: 255.1016, found: 255.1012.

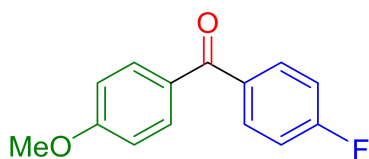

**(4-fluorophenyl)(4-methoxyphenyl)methanone<sup>2</sup> (4af)**. The residue was purified by column chromatography (Hexane/EtOAc =40/1) on silica gel and collected as pale yellow solid (39.6 mg, 86% yield). mp 91.8 °C. <sup>1</sup>H NMR (400 MHz, CDCl<sub>3</sub>) δ 7.78 (dt, *J* = 8.7, 2.4 Hz, 4H), 7.13 (t, *J* = 8.6 Hz, 2H), 6.95 (d, *J* = 8.7 Hz, 2H), 3.87 (s, 3H). <sup>13</sup>C {<sup>1</sup>H} NMR (100 MHz, CDCl<sub>3</sub>) δ 194.1, 166.3, 163.8, 163.3, 134.4, 134.4, 132.4, 132.3, 132.2, 130.0, 115.4, 115.2, 113.6, 55.5. <sup>19</sup>F NMR (377 MHz, CDCl<sub>3</sub>) δ -106.90 (s) ppm. HRMS *m/z* calculated for C<sub>14</sub>H<sub>11</sub>FO<sub>2</sub> [M+H]<sup>+</sup>: 231.0816, found: 231.0810.

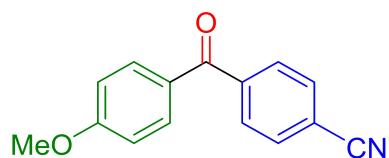

**4-(4-methoxybenzoyl)benzonitrile<sup>1</sup> (4ag).** The residue was purified by column chromatography (Hexane/EtOAc =25/1) on silica gel and collected as pale yellow solid (28 mg, 59% yield). mp 123.5 °C. <sup>1</sup>H NMR (400 MHz, CDCl<sub>3</sub>) δ 7.79 (q, *J* = 8.2 Hz, 6H), 6.97 (d, *J* = 8.8 Hz, 2H), 3.89 (s, 3H). <sup>13</sup>C {<sup>1</sup>H} NMR (100 MHz, CDCl<sub>3</sub>) δ 193.7, 163.9, 142.1, 132.6, 132.1, 129.9, 128.9, 118.1, 115.1, 113.9, 55.6. HRMS *m/z* calculated for C<sub>15</sub>H<sub>11</sub>NO<sub>2</sub> [M+H]<sup>+</sup>: 238.0863, found: 238.0865.

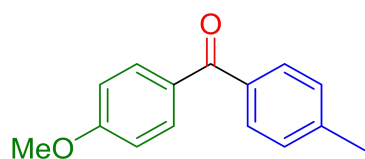

**(4-methoxyphenyl)(p-tolyl)methanone<sup>1</sup> (4ah).** The residue was purified by column chromatography (Hexane/EtOAc =40/1) on silica gel and collected as pale yellow solid (36.2 mg, 80% yield). mp 88.6 °C. <sup>1</sup>H NMR (400 MHz, CDCl<sub>3</sub>) δ 7.85 – 7.75 (m, 2H), 7.66 (d, *J* = 8.1 Hz, 2H), 7.25 (d, *J* = 7.9 Hz, 2H), 7.00 – 6.90 (m, 2H), 3.87 (s, 3H), 2.42 (s, 3H). <sup>13</sup>C {<sup>1</sup>H} NMR (100 MHz, CDCl<sub>3</sub>) δ 195.4, 163.0, 142.6, 135.5, 132.4, 130.5, 130.0, 128.9, 113.5, 55.5, 21.6. HRMS *m/z* calculated for C<sub>15</sub>H<sub>14</sub>O<sub>2</sub> [M+H]<sup>+</sup>: 227.1067, found: 227.1070.

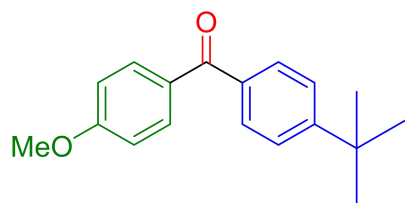

**(4-(tert-butyl)phenyl)(4-methoxyphenyl)methanone<sup>2</sup> (4ai).** The residue was purified by column chromatography (Hexane/EtOAc =40/1) on silica gel and collected as yellow oil (32.2 mg, 60% yield). <sup>1</sup>H NMR (400 MHz, CDCl<sub>3</sub>) δ 7.87 – 7.81 (m, 2H), 7.72 (d, *J* = 8.4 Hz, 2H), 7.49 (d, *J* = 8.4 Hz, 2H), 6.99 – 6.92 (m, 2H), 3.88 (s, 3H), 1.36 (s, 9H). <sup>13</sup>C {<sup>1</sup>H} NMR (100 MHz, CDCl<sub>3</sub>) δ 195.3, 163.1, 155.6, 135.5, 132.5, 130.4, 129.8, 125.2, 113.5, 55.5, 35.1, 31.2. HRMS *m/z* calculated for C<sub>18</sub>H<sub>20</sub>O<sub>2</sub> [M+H]<sup>+</sup>: 269.1536, found: 269.1543.



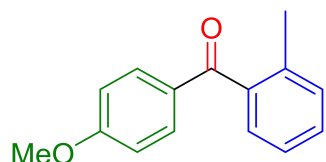

**(4-methoxyphenyl)(o-tolyl)methanone<sup>1</sup> (4aj).** The residue was purified by column chromatography (Hexane/EtOAc =40/1) on silica gel and collected as pale yellow oil (33.0 mg, 73% yield). <sup>1</sup>H NMR (400 MHz, CDCl<sub>3</sub>) δ 7.77 (d, *J* = 8.8 Hz, 2H), 7.34 (t, *J* = 7.3 Hz, 1H), 7.29 – 7.18 (m, 3H), 6.91 (d, *J* = 8.8 Hz, 2H), 3.84 (s, 3H), 2.28 (s, 3H). <sup>13</sup>C {<sup>1</sup>H} NMR (100 MHz, CDCl<sub>3</sub>) δ 197.4, 163.7, 139.2, 136.2, 132.5, 130.8, 130.5, 129.8, 127.9, 125.2, 113.7, 55.5, 19.8. HRMS *m/z* calculated for C<sub>15</sub>H<sub>14</sub>O<sub>2</sub> [M+H]<sup>+</sup>: 227.1067, found: 227.1066.

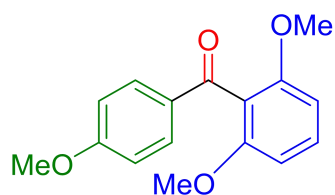

**(2,6-dimethoxyphenyl)(4-methoxyphenyl)methanone<sup>15</sup> (4ak).** The residue was purified by column chromatography (Hexane/EtOAc =15/1) on silica gel and collected as yellow oil (42.5 mg, 78% yield). <sup>1</sup>H NMR (400 MHz, CDCl<sub>3</sub>) δ 7.81 (dd, *J* = 8.7, 1.7 Hz, 2H), 7.32 (td, *J* = 8.4, 1.7 Hz, 1H), 6.95 – 6.85 (m, 2H), 6.60 (dd, *J* = 8.4, 1.6 Hz, 2H), 3.83 (s, 3H), 3.69 (s, 6H). <sup>13</sup>C {<sup>1</sup>H} NMR (100 MHz, CDCl<sub>3</sub>) δ 193.9, 163.7, 157.5, 131.8, 130.9, 130.6, 118.1, 113.7, 104.0, 55.9, 55.5. HRMS *m/z* calculated for C<sub>16</sub>H<sub>16</sub>O<sub>4</sub> [M+H]<sup>+</sup>: 273.1121, found: 273.1128.

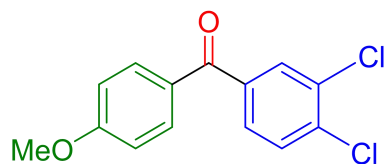

**(3,4-dichlorophenyl)(4-methoxyphenyl)methanone<sup>16</sup> (4al).** The residue was purified by column chromatography (Hexane/EtOAc =40/1) on silica gel and collected as white solid (52.6 mg, 92% yield). mp 88.4 °C. <sup>1</sup>H NMR (400 MHz, CDCl<sub>3</sub>) δ 7.89 – 7.73 (m, 3H), 7.57 (q, *J* = 8.6 Hz, 2H), 6.98 (d, *J* = 8.6 Hz, 2H), 3.89 (s, 3H). <sup>13</sup>C {<sup>1</sup>H} NMR (100 MHz, CDCl<sub>3</sub>) δ 192.9, 163.7, 137.9, 136.4, 132.8, 132.5, 131.6, 130.4, 129.2, 128.8, 113.8, 55.6. HRMS *m/z* calculated for C<sub>14</sub>H<sub>10</sub>Cl<sub>2</sub>O<sub>2</sub> [M+H]<sup>+</sup>: 281.0131, found: 281.0137.

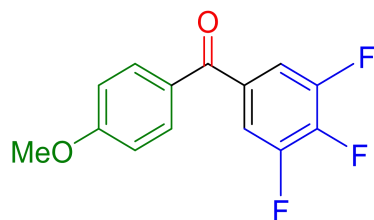

**(4-methoxyphenyl)(3,4,5-trifluorophenyl)methanone (4am).** The residue was purified by column chromatography (Hexane/EtOAc =40/1) on silica gel and collected as white solid (52.6 mg, 92% yield). mp 99.8 °C.  $^1\text{H NMR}$  (400 MHz,  $\text{CDCl}_3$ )  $\delta$  7.82 – 7.73 (m, 2H), 7.46 – 7.36 (m, 2H), 7.03 – 6.92 (m, 2H), 3.90 (s, 3H).  $^{13}\text{C}$   $\{^1\text{H}\}$  NMR (100 MHz,  $\text{CDCl}_3$ )  $\delta$  191.6, 163.8, 152.2, 152.2, 152.1, 152.1, 149.7, 149.7, 149.6, 149.5, 143.8, 143.6, 143.5, 141.2, 141.1, 140.9, 133.8, 133.7, 132.4, 128.7, 114.4, 114.3, 114.2, 114.1, 113.9, 55.6.  $^{19}\text{F NMR}$  (377 MHz,  $\text{CDCl}_3$ )  $\delta$  -132.55 (s), -154.18 (s) ppm. HRMS  $m/z$  calculated for  $\text{C}_{14}\text{H}_9\text{F}_3\text{O}_2$   $[\text{M}+\text{H}]^+$ : 267.0627, found: 267.0629.

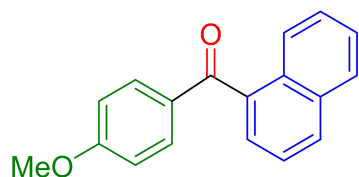

**(4-methoxyphenyl)(naphthalen-1-yl)methanone<sup>1</sup> (4an).** The residue was purified by column chromatography (Hexane/EtOAc =40/1) on silica gel and collected as pale yellow oil (28.8 mg, 55% yield).  $^1\text{H NMR}$  (400 MHz,  $\text{CDCl}_3$ )  $\delta$  8.00 (t,  $J = 9.2$  Hz, 2H), 7.91 (d,  $J = 7.9$  Hz, 1H), 7.86 (d,  $J = 8.8$  Hz, 2H), 7.60 – 7.43 (m, 4H), 6.93 (d,  $J = 8.8$  Hz, 2H), 3.87 (s, 3H).  $^{13}\text{C}$   $\{^1\text{H}\}$  NMR (100 MHz,  $\text{CDCl}_3$ )  $\delta$  196.8, 163.9, 137.1, 133.7, 132.8, 131.1, 130.9, 130.7, 128.4, 127.1, 126.9, 126.4, 125.8, 124.5, 113.8, 55.6. HRMS  $m/z$  calculated for  $\text{C}_{18}\text{H}_{14}\text{O}_2$   $[\text{M}+\text{H}]^+$ : 263.1067, found: 263.1070.

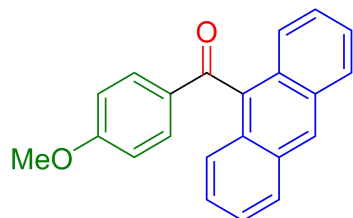

**anthracen-9-yl(4-methoxyphenyl)methanone<sup>17</sup> (4ao).** The residue was purified by column chromatography (Hexane/EtOAc =15/1) on silica gel and collected as yellow solid (29.4 mg, 47% yield). mp 186.6 °C.  $^1\text{H NMR}$  (400 MHz,  $\text{CDCl}_3$ )  $\delta$  8.55 (s, 1H), 8.06 (d,  $J = 8.5$  Hz, 2H), 7.87 –

7.70 (m, 4H), 7.50 – 7.35 (m, 4H), 6.87 (d,  $J = 8.9$  Hz, 2H), 3.82 (s, 3H).  $^{13}\text{C}$   $\{^1\text{H}\}$  NMR (100 MHz,  $\text{CDCl}_3$ )  $\delta$  198.6, 164.3, 134.5, 132.6, 131.5, 131.1, 128.6, 128.6, 128.1, 126.4, 125.5, 125.4, 114.1, 55.5. HRMS  $m/z$  calculated for  $\text{C}_{22}\text{H}_{16}\text{O}_2$   $[\text{M}+\text{H}]^+$ : 313.1223, found: 313.1218.

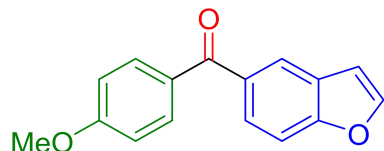

**benzofuran-5-yl(4-methoxyphenyl)methanone (4ap).** The residue was purified by column chromatography (Hexane/EtOAc =6/1) on silica gel and collected as pale yellow solid (36.8 mg, 73% yield). mp 126.7 °C.  $^1\text{H}$  NMR (400 MHz,  $\text{CDCl}_3$ )  $\delta$  8.04 (d,  $J = 1.5$  Hz, 1H), 7.87 – 7.81 (m, 2H), 7.78 (dd,  $J = 8.6, 1.7$  Hz, 1H), 7.71 (d,  $J = 2.2$  Hz, 1H), 7.57 (d,  $J = 8.6$  Hz, 1H), 7.02 – 6.94 (m, 2H), 6.85 (d,  $J = 1.5$  Hz, 1H), 3.89 (s, 3H).  $^{13}\text{C}$   $\{^1\text{H}\}$  NMR (100 MHz,  $\text{CDCl}_3$ )  $\delta$  195.4, 163.0, 156.9, 146.3, 133.4, 132.5, 130.7, 127.2, 126.6, 124.0, 113.5, 111.2, 107.2, 55.5. HRMS  $m/z$  calculated for  $\text{C}_{16}\text{H}_{12}\text{O}_3$   $[\text{M}+\text{H}]^+$ : 253.0859, found: 253.0863.

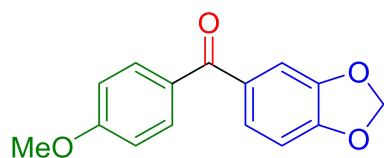

**benzo[d][1,3]dioxol-5-yl(4-methoxyphenyl)methanone<sup>18</sup> (4aq).** The residue was purified by column chromatography (Hexane/EtOAc =40/1) on silica gel and collected as white solid (42.5 mg, 83% yield). mp 96.2 °C.  $^1\text{H}$  NMR (400 MHz,  $\text{CDCl}_3$ )  $\delta$  7.77 (d,  $J = 8.8$  Hz, 2H), 7.36 – 7.27 (m, 2H), 6.94 (d,  $J = 8.8$  Hz, 2H), 6.85 (d,  $J = 8.0$  Hz, 1H), 6.04 (s, 2H), 3.87 (s, 3H).  $^{13}\text{C}$   $\{^1\text{H}\}$  NMR (100 MHz,  $\text{CDCl}_3$ )  $\delta$  194.0, 162.9, 151.1, 147.8, 132.4, 132.2, 130.5, 126.2, 113.5, 109.9, 107.6, 101.8, 55.5. HRMS  $m/z$  calculated for  $\text{C}_{15}\text{H}_{12}\text{O}_4$   $[\text{M}+\text{H}]^+$ : 257.0808, found: 257.0814.

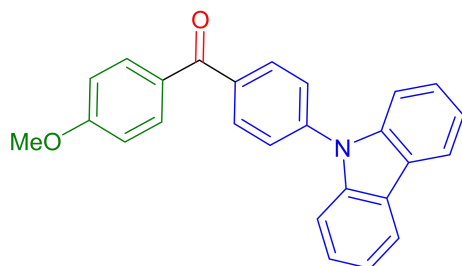

**(4-(9H-carbazol-9-yl)phenyl)(4-methoxyphenyl)methanone (4ar).** The residue was purified by column chromatography (Hexane/EtOAc =40/1) on silica gel and collected as yellow solid (59.6 mg, 79% yield). mp 167.4 °C.  $^1\text{H}$  NMR (400 MHz,  $\text{CDCl}_3$ )  $\delta$  8.17 (d,  $J = 7.7$  Hz, 2H), 8.03 (d,  $J = 8.4$  Hz, 2H), 7.94 (d,  $J = 8.8$  Hz, 2H), 7.72 (d,  $J = 8.4$  Hz, 2H), 7.53 (d,  $J = 8.2$  Hz, 2H), 7.50 –

7.41 (m, 2H), 7.37 – 7.30 (m, 2H), 7.04 (d,  $J = 8.8$  Hz, 2H), 3.92 (s, 3H).  $^{13}\text{C}$  { $^1\text{H}$ } NMR (100 MHz,  $\text{CDCl}_3$ )  $\delta$  194.5, 163.4, 141.2, 140.3, 136.8, 132.6, 131.6, 130.0, 126.3, 126.2, 123.8, 120.5, 120.5, 113.8, 109.8, 55.6. HRMS  $m/z$  calculated for  $\text{C}_{26}\text{H}_{19}\text{NO}_2$   $[\text{M}+\text{H}]^+$ : 378.1489, found: 378.1507.

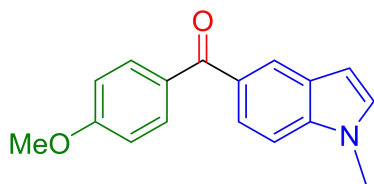

**(4-methoxyphenyl)(1-methyl-1H-indol-5-yl)methanone (4as).** The residue was purified by column chromatography (Hexane/EtOAc =6/1) on silica gel and collected as pale yellow solid (39.2 mg, 74% yield). mp 96.4 °C.  $^1\text{H}$  NMR (400 MHz,  $\text{CDCl}_3$ )  $\delta$  8.09 (d,  $J = 1.2$  Hz, 1H), 7.87 – 7.81 (m, 2H), 7.77 (dd,  $J = 8.6, 1.6$  Hz, 1H), 7.38 (d,  $J = 8.6$  Hz, 1H), 7.13 (d,  $J = 3.1$  Hz, 1H), 7.01 – 6.94 (m, 2H), 6.58 (d,  $J = 3.1$  Hz, 1H), 3.89 (s, 3H), 3.84 (s, 3H).  $^{13}\text{C}$  { $^1\text{H}$ } NMR (100 MHz,  $\text{CDCl}_3$ )  $\delta$  196.2, 162.6, 138.8, 132.4, 131.5, 130.3, 129.7, 127.6, 124.9, 123.7, 113.3, 109.0, 102.8, 55.5, 33.1. HRMS  $m/z$  calculated for  $\text{C}_{17}\text{H}_{15}\text{NO}_2$   $[\text{M}+\text{H}]^+$ : 266.1176, found: 266.1176.

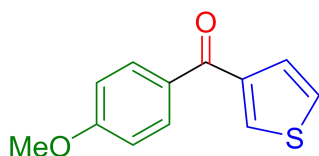

**(4-methoxyphenyl)(thiophen-3-yl)methanone<sup>19</sup> (4at).** The residue was purified by column chromatography (Hexane/EtOAc =40/1) on silica gel and collected as yellow solid (25.7 mg, 59% yield). mp 66.0 °C.  $^1\text{H}$  NMR (400 MHz,  $\text{CDCl}_3$ )  $\delta$  7.87 (d,  $J = 8.8$  Hz, 3H), 7.55 (d,  $J = 5.0$  Hz, 1H), 7.37 (dd,  $J = 5.0, 2.9$  Hz, 1H), 6.97 (d,  $J = 8.8$  Hz, 2H), 3.88 (s, 3H).  $^{13}\text{C}$  { $^1\text{H}$ } NMR (100 MHz,  $\text{CDCl}_3$ )  $\delta$  188.9, 163.2, 141.5, 132.8, 131.9, 131.2, 128.7, 126.0, 113.7, 55.5. HRMS  $m/z$  calculated for  $\text{C}_{12}\text{H}_{10}\text{O}_2\text{S}$   $[\text{M}+\text{H}]^+$ : 219.0474, found: 219.0465.

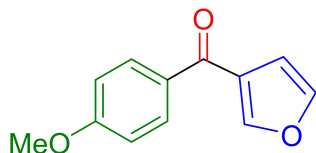

**furan-3-yl(4-methoxyphenyl)methanone<sup>20</sup> (4au).** The residue was purified by column chromatography (Hexane/EtOAc =40/1) on silica gel and collected as white solid (26.7 mg, 66% yield). mp 73.6 °C.  $^1\text{H}$  NMR (400 MHz,  $\text{CDCl}_3$ )  $\delta$  7.97 – 7.83 (m, 3H), 7.49 (s, 1H), 6.96 (d,  $J = 8.6$  Hz, 2H), 6.87 (s, 1H), 3.87 (s, 3H).  $^{13}\text{C}$  { $^1\text{H}$ } NMR (100 MHz,  $\text{CDCl}_3$ )  $\delta$  188.0, 163.3, 147.7,

143.7, 131.4, 131.2, 126.5, 113.8, 110.4, 55.5. HRMS  $m/z$  calculated for  $C_{12}H_{10}O_3$   $[M+H]^+$ : 203.0703, found: 203.0699.

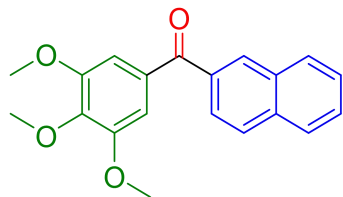

**Naphthylphenstatin**<sup>21</sup> (**7**). The residue was purified by column chromatography (Hexane/EtOAc =15/1) on silica gel and collected as yellow solid (54.1 mg, 84% yield). mp 106.1 °C. **<sup>1</sup>H NMR** (400 MHz,  $CDCl_3$ )  $\delta$  8.29 (s, 1H), 7.94 (q,  $J$  = 8.2 Hz, 4H), 7.66 – 7.52 (m, 2H), 7.13 (s, 2H), 3.96 (s, 3H), 3.87 (s, 6H). **<sup>13</sup>C {<sup>1</sup>H} NMR** (100 MHz,  $CDCl_3$ )  $\delta$  195.8, 152.9, 142.0, 135.2, 135.0, 132.9, 132.3, 131.5, 129.3, 128.3, 128.3, 127.8, 126.9, 125.8, 107.8, 61.0, 56.3. HRMS  $m/z$  calculated for  $C_{20}H_{18}O_4$   $[M+H]^+$ : 323.1278, found: 323.1275.

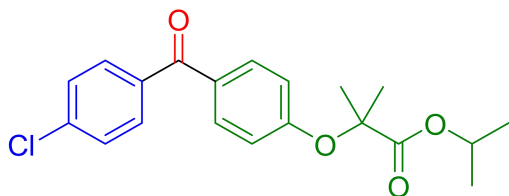

**Fenofibrate**<sup>22</sup> (**10**). The residue was purified by column chromatography (Hexane/EtOAc =25/1) on silica gel and collected as yellow solid (30.3 mg, 42% yield). mp 79.3 °C. **<sup>1</sup>H NMR** (400 MHz,  $CDCl_3$ )  $\delta$  7.79 – 7.63 (m, 4H), 7.50 – 7.38 (m, 2H), 6.90 – 6.80 (m, 2H), 5.16 – 4.99 (m, 1H), 1.66 (s, 6H), 1.20 (d,  $J$  = 6.3 Hz, 6H). **<sup>13</sup>C {<sup>1</sup>H} NMR** (100 MHz,  $CDCl_3$ )  $\delta$  194.3, 173.1, 159.7, 138.4, 136.4, 132.0, 131.2, 130.2, 128.5, 117.2, 79.4, 69.4, 25.4, 21.5. HRMS  $m/z$  calculated for  $C_{20}H_{21}ClO_4$   $[M+H]^+$ : 361.1201, found: 361.124.

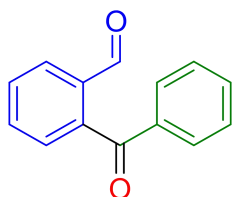

**2-benzoylbenzaldehyde**<sup>29</sup> (**4av**). The residue was purified by column chromatography (Hexane/EtOAc = 15/1) on silica gel and collected as yellow solid (28.1 mg, 67% yield). mp 66 °C. **<sup>1</sup>H NMR** (400 MHz,  $CDCl_3$ )  $\delta$  9.98 (s, 1H), 8.02 – 7.93 (m, 1H), 7.76 (d,  $J$  = 7.3 Hz, 2H), 7.69 – 7.61 (m, 2H), 7.55 (t,  $J$  = 7.4 Hz, 1H), 7.49 – 7.37 (m, 3H). **<sup>13</sup>C {<sup>1</sup>H} NMR** (100 MHz,  $CDCl_3$ )  $\delta$  196.5, 190.7, 141.3, 137.1, 135.4, 133.7, 133.4, 130.7, 130.2, 130.0, 128.9, 128.7.

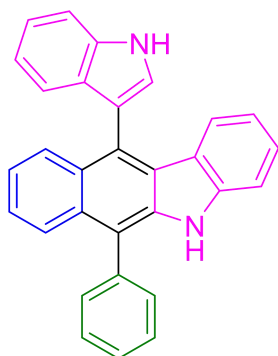

**11-(1H-indol-3-yl)-6-phenyl-5H-benzo[b]carbazole<sup>24</sup> (4av-1).** The residue was purified by column chromatography (Hexane/EtOAc =8/1) on silica gel and collected as yellow solid (75 mg,92% yield). mp 136 °C. <sup>1</sup>H NMR (400 MHz, CDCl<sub>3</sub>) δ 8.35 (s, 1H), 8.13 (d, *J* = 8.6 Hz, 1H), 8.04 (d, *J* = 8.6 Hz, 1H), 7.95 (s, 1H), 7.86 – 7.71 (m, 4H), 7.68 – 7.62 (m, 1H), 7.59 (d, *J* = 8.4 Hz, 1H), 7.55 – 7.48 (m, 1H), 7.43 – 7.32 (m, 5H), 7.27 (d, *J* = 6.8 Hz, 1H), 7.21 – 7.12 (m, 2H), 6.89 (t, *J* = 7.5 Hz, 1H). <sup>13</sup>C {<sup>1</sup>H} NMR (100 MHz, CDCl<sub>3</sub>) δ 142.3, 137.7, 137.3, 136.4, 131.2, 131.0, 129.6, 129.5, 128.2, 128.1, 127.3, 127.1, 126.3, 125.3, 124.9, 124.7, 124.2, 123.9, 123.6, 122.7, 120.7, 120.4, 119.3, 117.9, 113.9, 111.6, 110.0. HRMS *m/z* calculated for C<sub>30</sub>H<sub>20</sub>N [M+H]<sup>+</sup>: 409.1699, found: 409.1675.

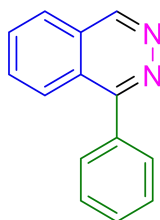

**1-phenylphthalazine<sup>25</sup> (4av-2).** The residue was purified by column chromatography (Hexane/EtOAc =1/1) on silica gel and collected as white solid (41.2 mg, 100% yield). mp 123 °C. <sup>1</sup>H NMR (400 MHz, CDCl<sub>3</sub>) δ 9.51 (d, *J* = 4.7 Hz, 1H), 8.03 (dt, *J* = 20.7, 6.0 Hz, 2H), 7.95 – 7.79 (m, 2H), 7.74 (s, 2H), 7.55 (t, *J* = 5.3 Hz, 3H). <sup>13</sup>C {<sup>1</sup>H} NMR (100 MHz, CDCl<sub>3</sub>) δ 159.9, 150.5, 136.1, 132.6, 132.3, 130.0, 129.4, 128.6, 127.1, 126.7, 126.2, 125.4. HRMS *m/z* calculated for C<sub>14</sub>H<sub>10</sub>N<sub>2</sub> [M+H]<sup>+</sup>: 207.0917, found: 207.0918.

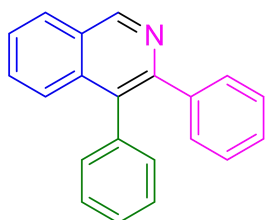

**3,4-diphenylisoquinoline<sup>26</sup> (4av-3).** The residue was purified by column chromatography (Hexane/EtOAc =15/1) on silica gel and collected as white solid (45.0 mg, 100% yield). mp 156.6 °C. <sup>1</sup>H NMR (400 MHz, CDCl<sub>3</sub>) δ 9.27 (s, 1H), 8.00 – 7.90 (m, 1H), 7.62 – 7.45 (m, 3H), 7.36 – 7.19 (m, 5H), 7.20 – 7.03 (m, 5H). <sup>13</sup>C {<sup>1</sup>H} NMR (100 MHz, CDCl<sub>3</sub>) δ 151.8, 150.6, 140.7, 137.2, 136.0, 131.2, 130.7, 130.6, 130.3, 128.3, 127.7, 127.6, 127.4, 127.4, 127.1, 126.9, 125.6. HRMS m/z calculated for C<sub>21</sub>H<sub>15</sub>N [M+H]<sup>+</sup>: 282.1277, found: 282.1287.

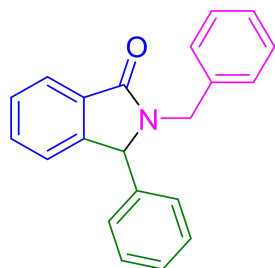

**2-benzyl-3-phenylisoindolin-1-one<sup>27</sup> (4av-4).** The residue was purified by column chromatography (Hexane/EtOAc =15/1) on silica gel and collected as white solid (55.0 mg, 92% yield). mp 135 °C. <sup>1</sup>H NMR (400 MHz, CDCl<sub>3</sub>) δ 7.85 (d, *J* = 7.2 Hz, 1H), 7.40 – 7.32 (m, 2H), 7.30 – 7.23 (m, 3H), 7.18 (q, *J* = 9.0, 7.5 Hz, 3H), 7.09 (d, *J* = 7.2 Hz, 2H), 7.05 – 6.93 (m, 3H), 5.31 (d, *J* = 14.8 Hz, 1H), 5.14 (s, 1H), 3.63 (d, *J* = 14.9 Hz, 1H). <sup>13</sup>C {<sup>1</sup>H} NMR (100 MHz, CDCl<sub>3</sub>) δ 168.5, 146.4, 137.1, 136.8, 131.9, 131.4, 129.2, 128.7, 128.5, 128.3, 127.8, 127.6, 123.8, 123.2, 63.6, 43.9. HRMS m/z calculated for C<sub>21</sub>H<sub>17</sub>NO [M+H]<sup>+</sup>: 300.1383, found: 300.1389.

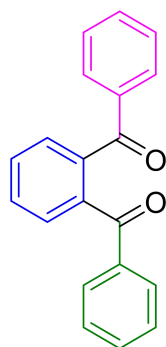

**1,3-diphenylisobenzofuran (4av-5).** The residue was purified by column chromatography (Hexane/EtOAc =15/1) on silica gel and collected as yellow solid (48.6 mg, 90% yield). mp 140 °C. <sup>1</sup>H NMR (400 MHz, CDCl<sub>3</sub>) δ 7.76 (d, *J* = 7.6 Hz, 4H), 7.66 (s, 4H), 7.56 (t, *J* = 7.3 Hz, 2H), 7.42 (t, *J* = 7.7 Hz, 4H). <sup>13</sup>C {<sup>1</sup>H} NMR (100 MHz, CDCl<sub>3</sub>) δ 196.7, 140.1, 137.3, 133.1, 130.5, 129.9, 129.8, 128.5. HRMS m/z calculated for C<sub>20</sub>H<sub>14</sub>O<sub>2</sub> [M+H]<sup>+</sup>: 287.1067, found: 287.1069.

# $^1\text{H}$ NMR and $^{13}\text{C}$ $\{^1\text{H}\}$ NMR Spectra of Products

## (4-methoxyphenyl)(phenyl)methanone (**4a**)

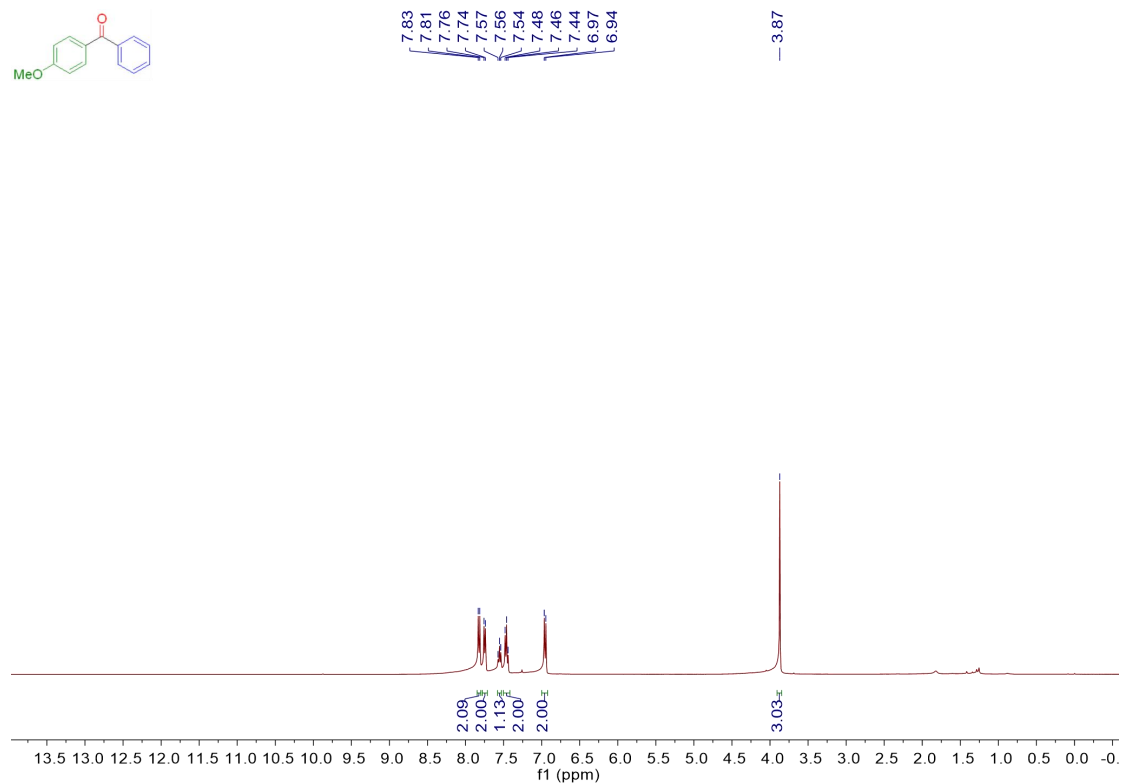

### $^1\text{H}$ -NMR (400 MHz, $\text{CDCl}_3$ ) of **4a**

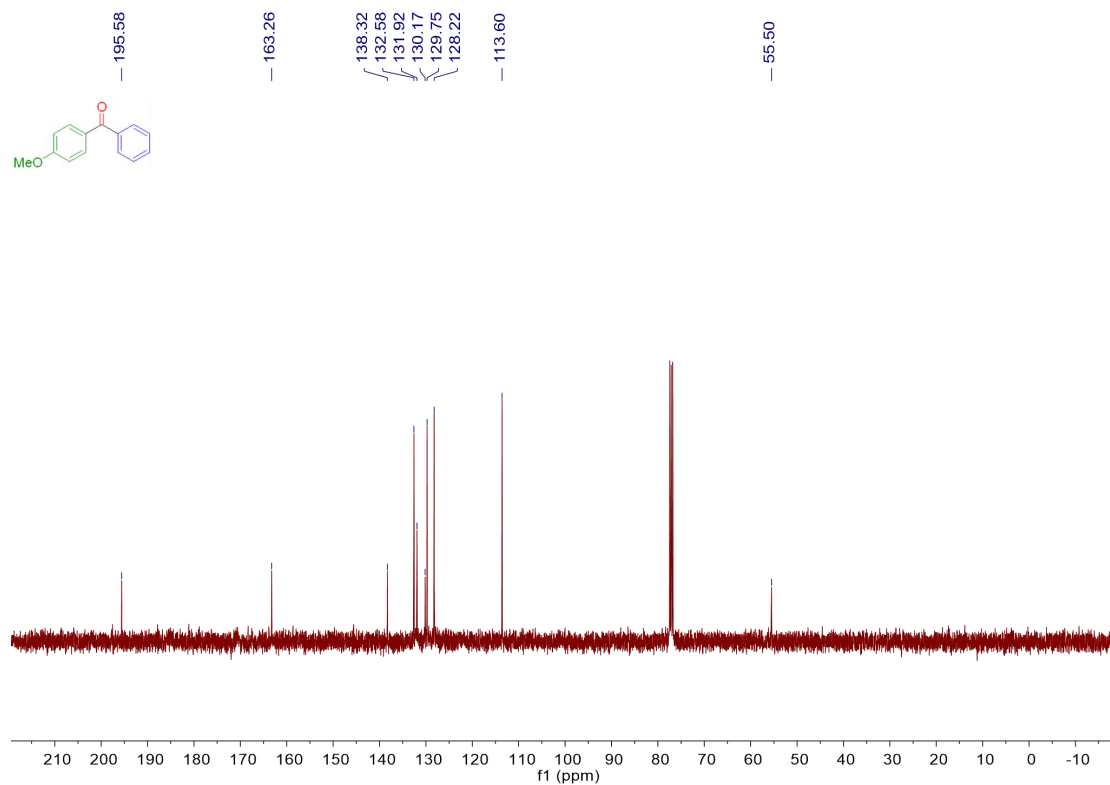

### $^{13}\text{C}$ $\{^1\text{H}\}$ NMR (100 MHz, $\text{CDCl}_3$ ) of **4a**



(4-(methylthio)phenyl)(phenyl)methanone (**4b**)

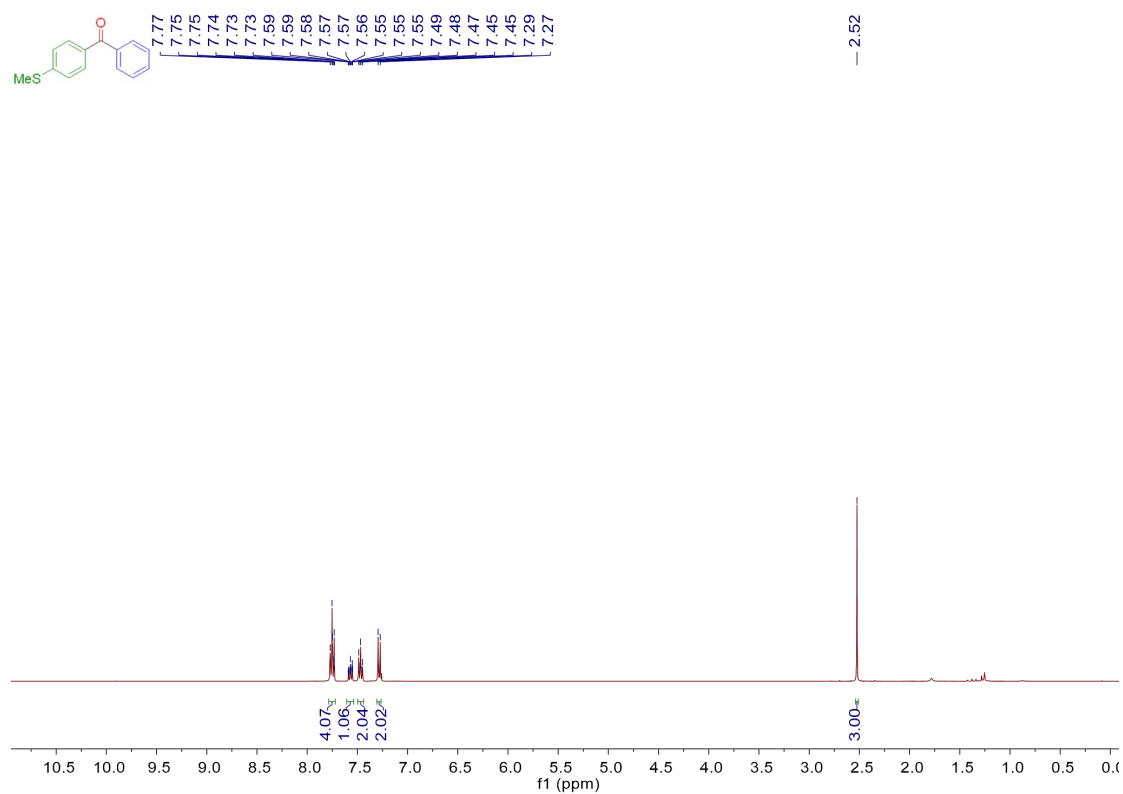

<sup>1</sup>H-NMR (400 MHz, CDCl<sub>3</sub>) of **4b**

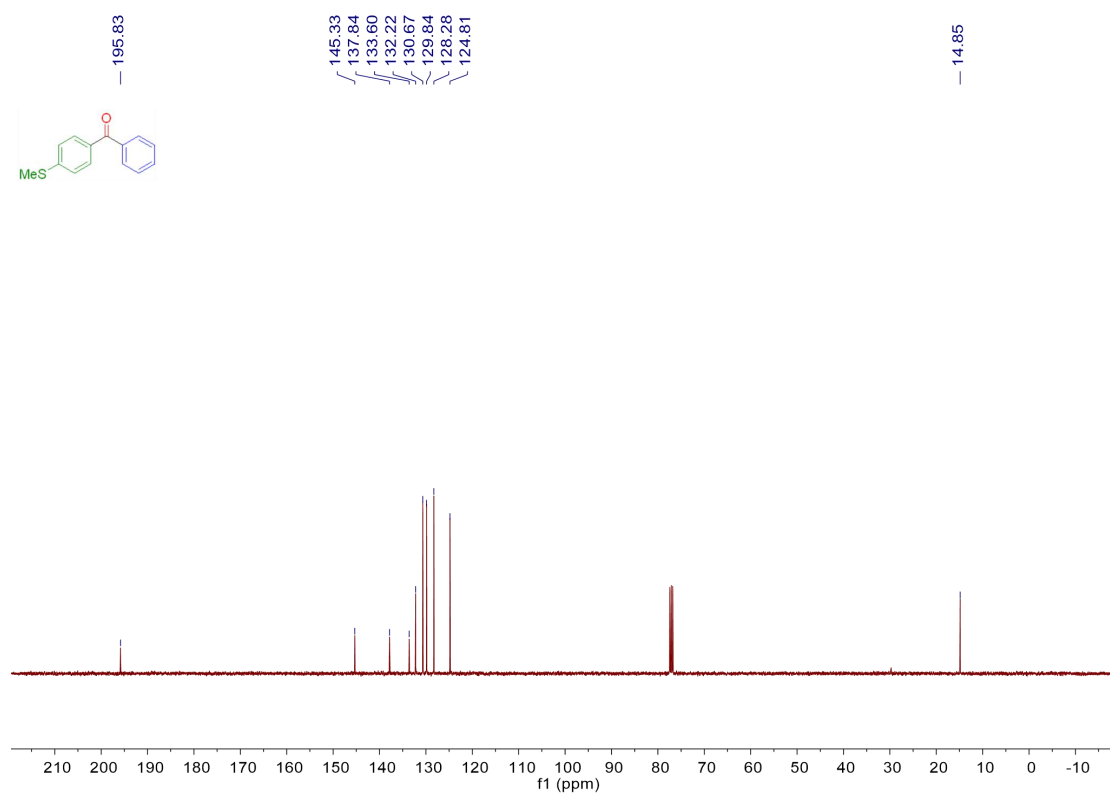

<sup>13</sup>C {<sup>1</sup>H} NMR (100 MHz, CDCl<sub>3</sub>) of **4b**

(4-(dimethylamino)phenyl)(phenyl)methanone (**4c**)

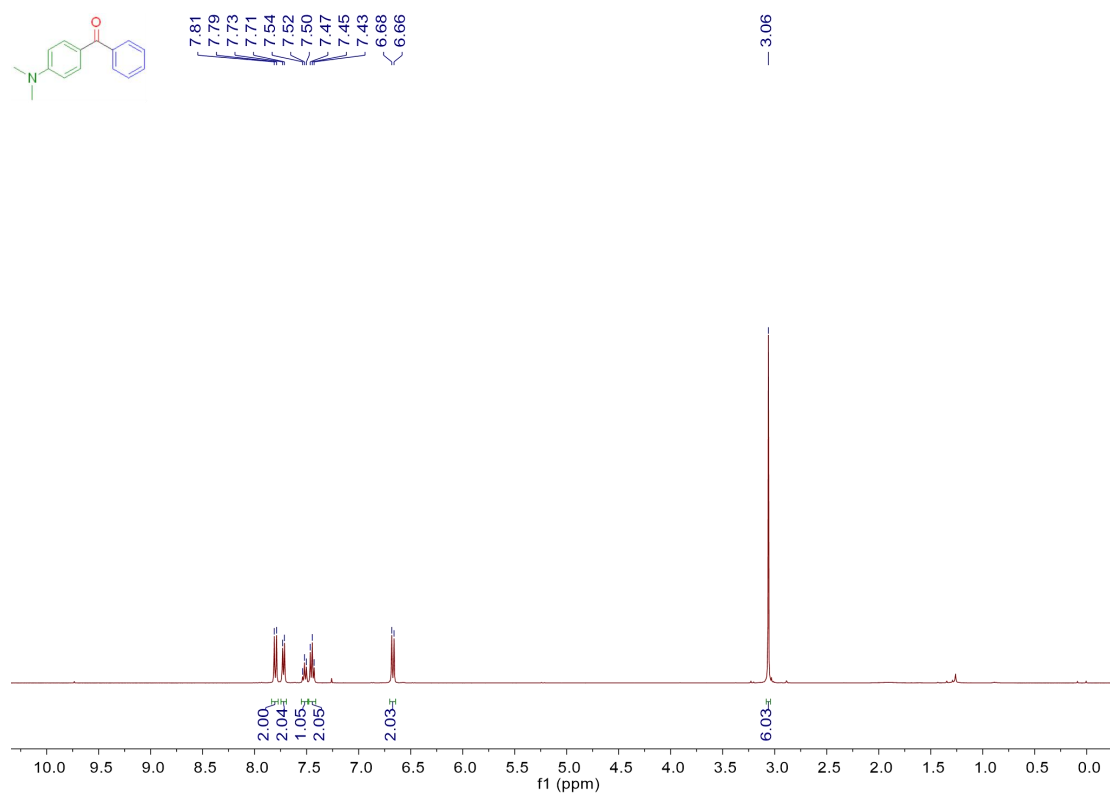

<sup>1</sup>H-NMR (400 MHz, CDCl<sub>3</sub>) of **4c**

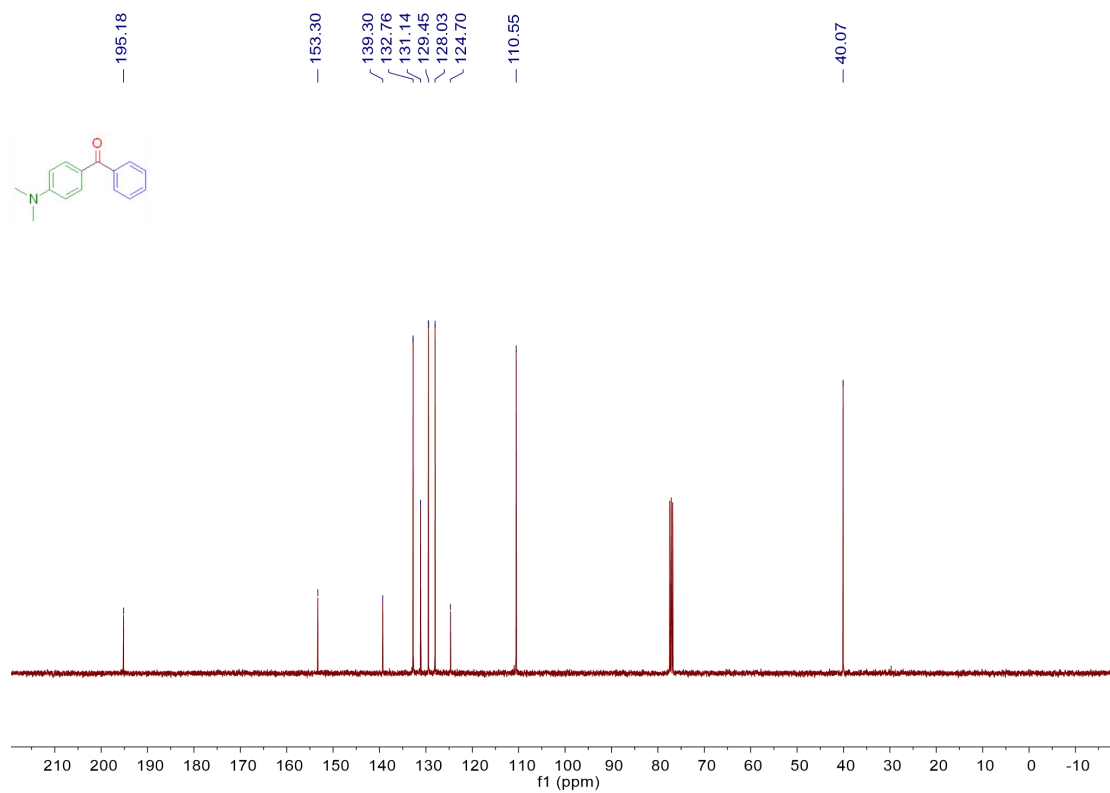

<sup>13</sup>C {<sup>1</sup>H} NMR (100 MHz, CDCl<sub>3</sub>) of **4c**

phenyl(p-tolyl)methanone (**4d**)

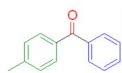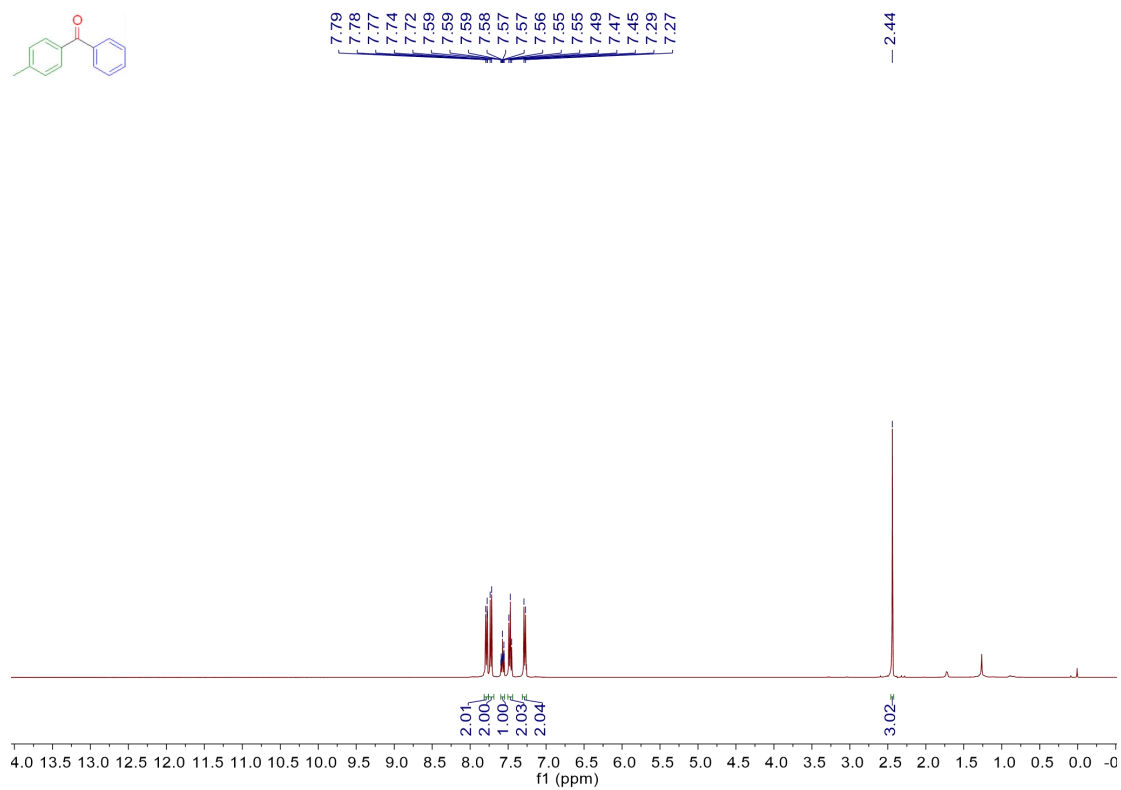

<sup>1</sup>H-NMR (400 MHz, CDCl<sub>3</sub>) of **4d**

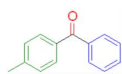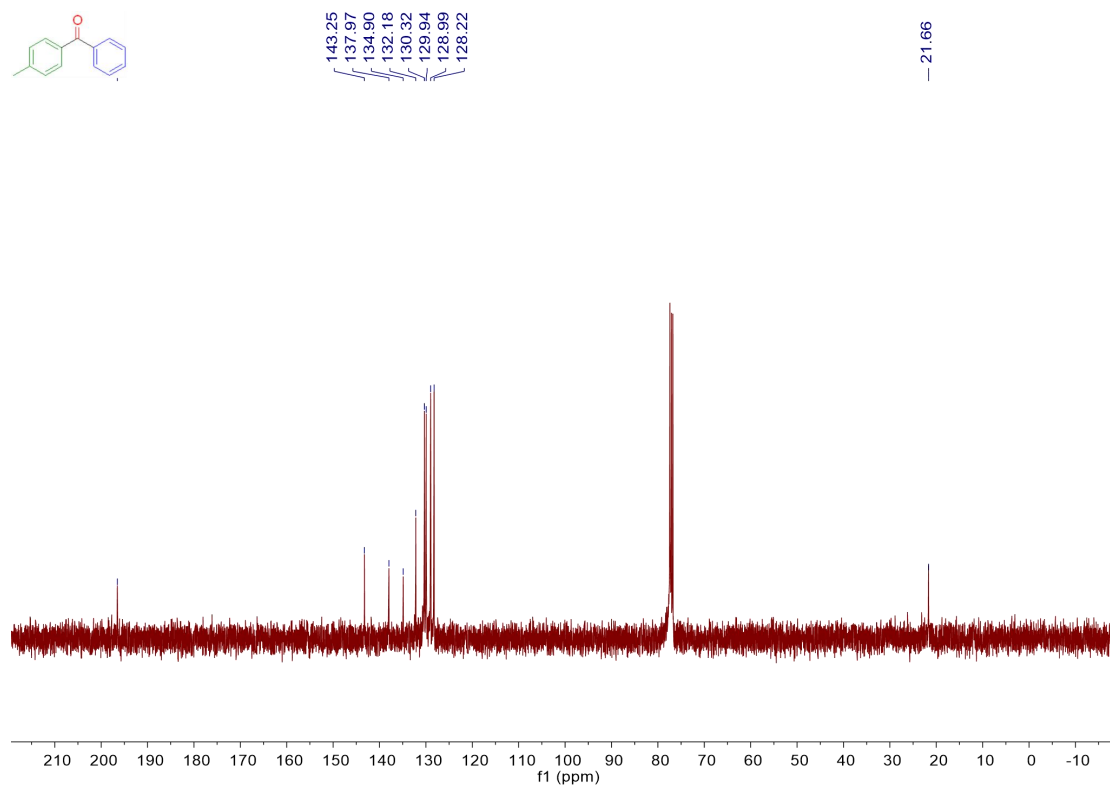

<sup>13</sup>C {<sup>1</sup>H} NMR (100 MHz, CDCl<sub>3</sub>) of **4d**

ethyl 2-(4-benzoylphenyl)acetate (**4e**)

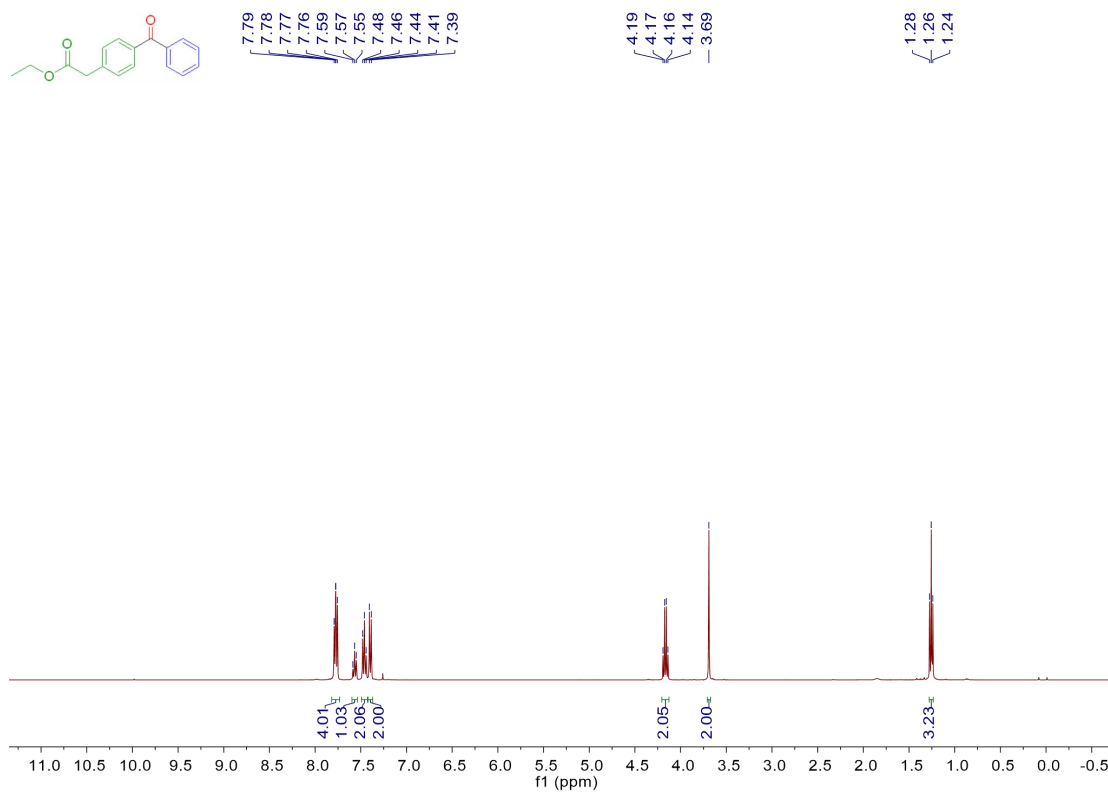

<sup>1</sup>H-NMR (400 MHz, CDCl<sub>3</sub>) of **4e**

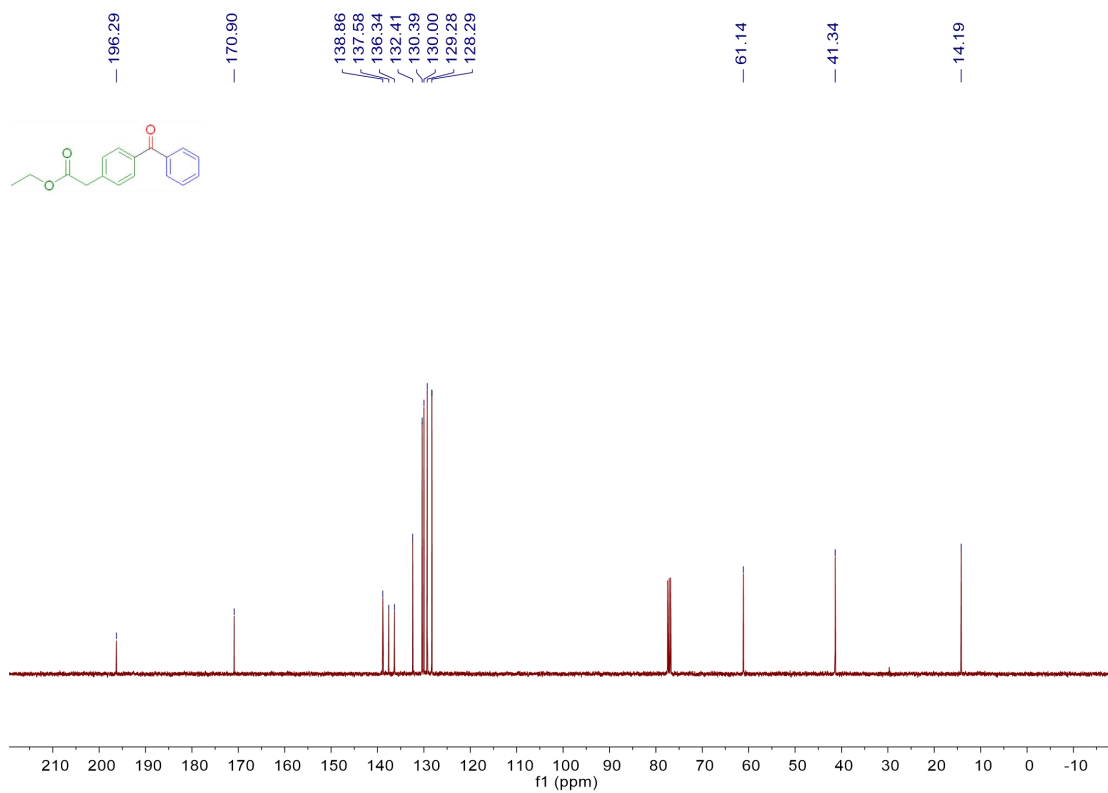

<sup>13</sup>C {<sup>1</sup>H} NMR (100 MHz, CDCl<sub>3</sub>) of **4e**

methyl 4-benzoylbenzoate (**4f**)

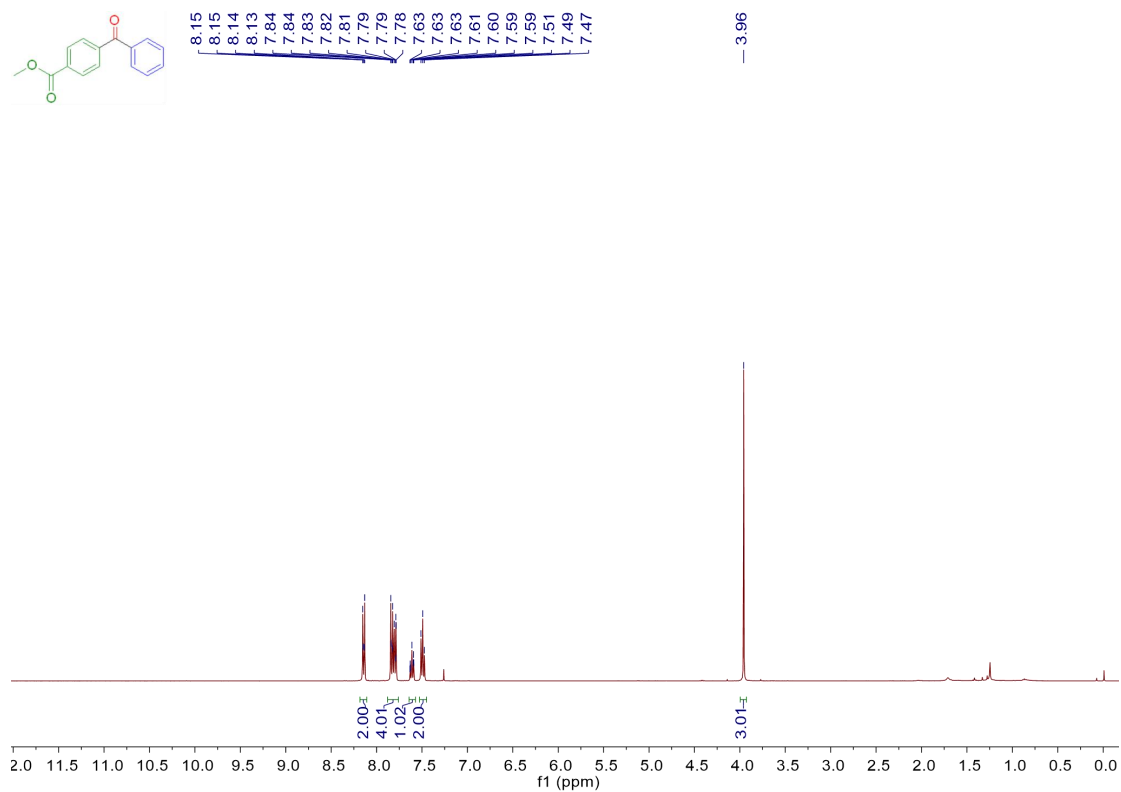

$^1\text{H-NMR}$  (400 MHz,  $\text{CDCl}_3$ ) of **4f**

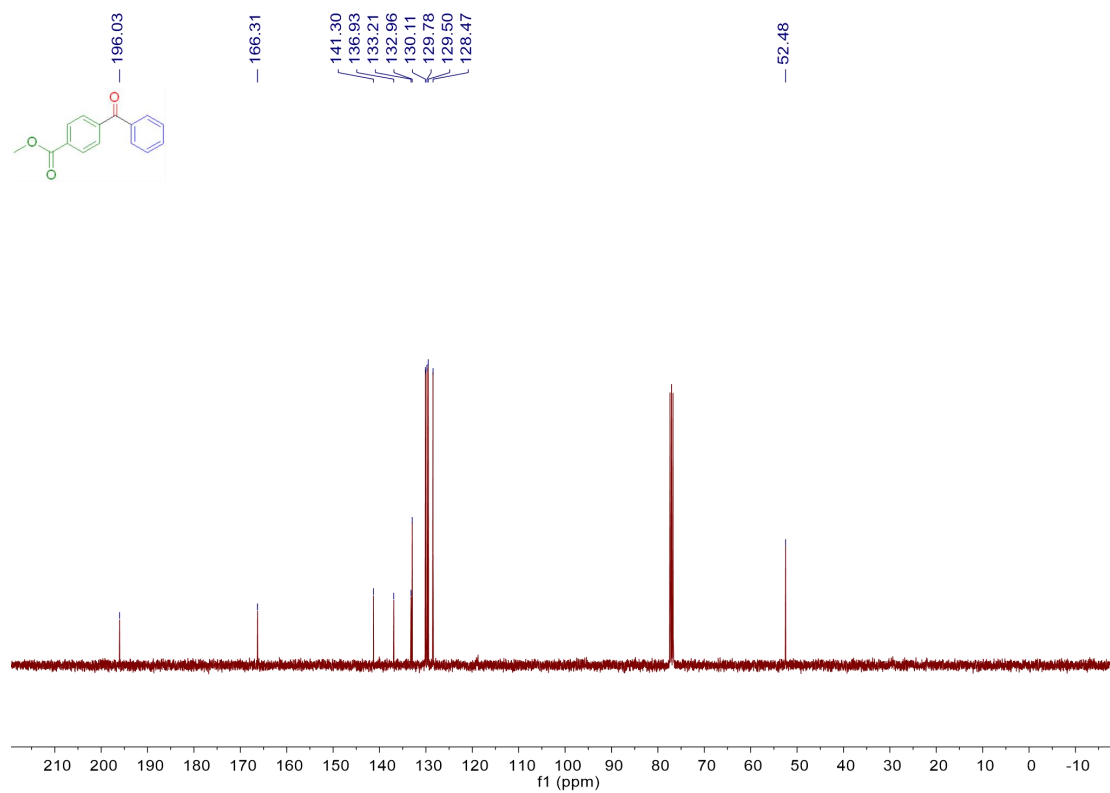

$^{13}\text{C} \{^1\text{H}\}$  NMR (100 MHz,  $\text{CDCl}_3$ ) of **4f**

# 1-(4-benzoylphenyl)ethan-1-one (4g)

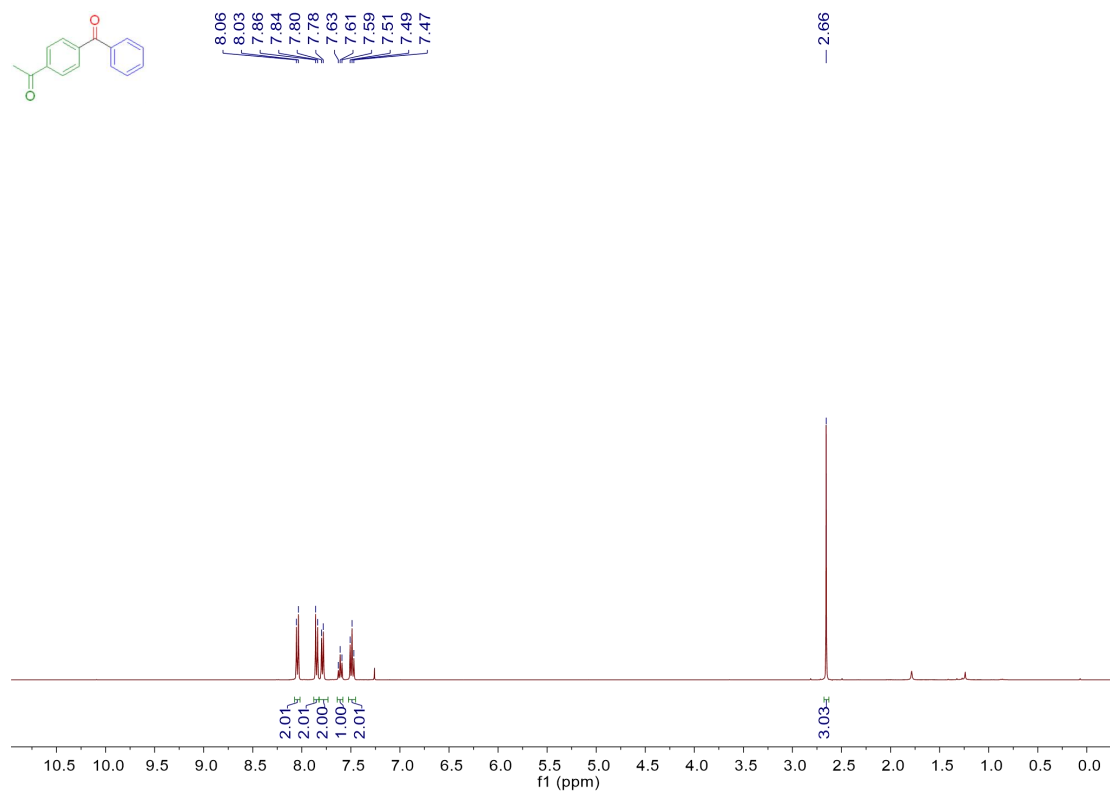

## <sup>1</sup>H-NMR (400 MHz, CDCl<sub>3</sub>) of **4g**

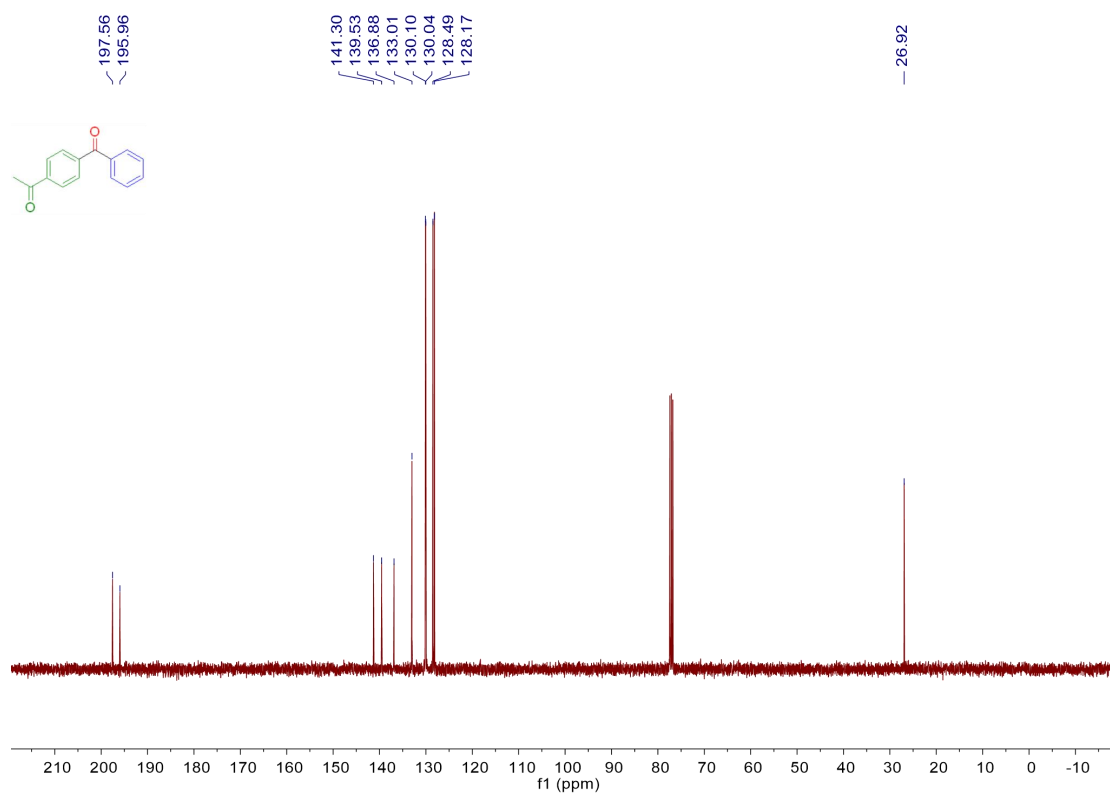

## <sup>13</sup>C {<sup>1</sup>H} NMR (100 MHz, CDCl<sub>3</sub>) of **4g**

# 1,4-phenylenebis(phenylmethanone) (**4h**)

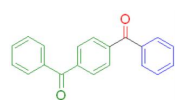

7.89  
7.85  
7.83  
7.65  
7.63  
7.61  
7.53  
7.51  
7.49

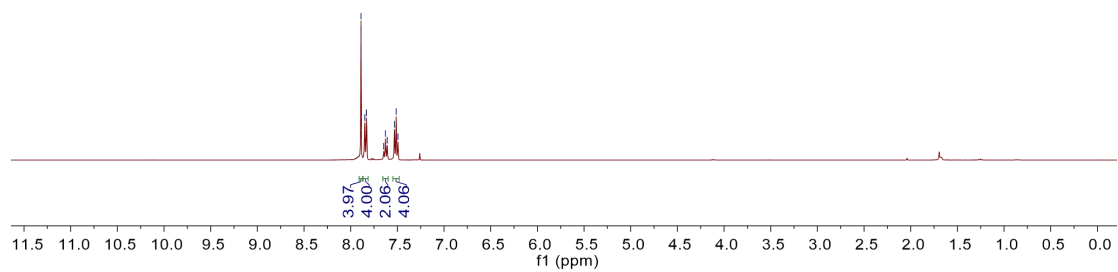

<sup>1</sup>H-NMR (400 MHz, CDCl<sub>3</sub>) of **4h**

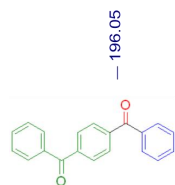

196.05  
140.66  
136.95  
133.00  
130.15  
129.75  
128.50

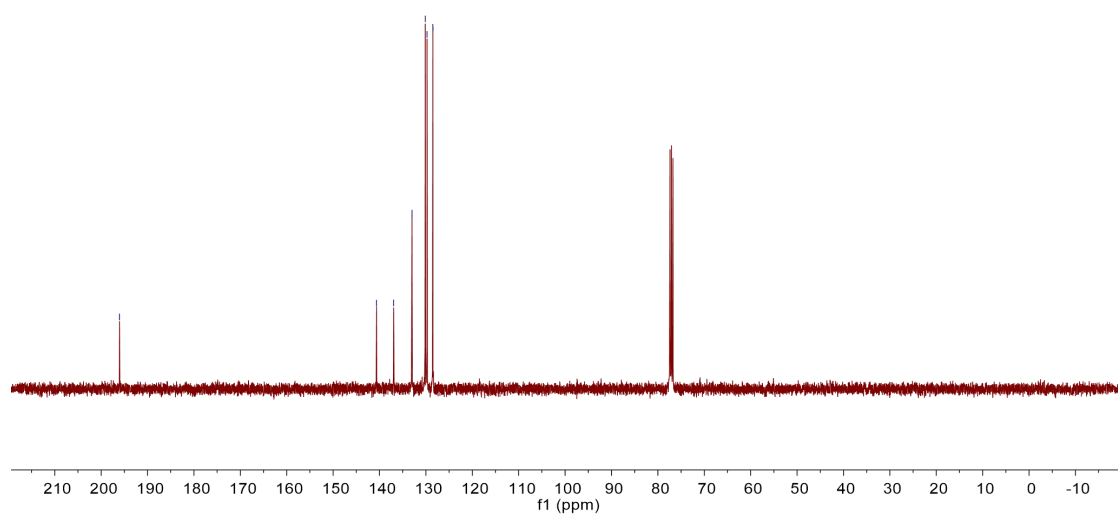

<sup>13</sup>C {<sup>1</sup>H} NMR (100 MHz, CDCl<sub>3</sub>) of **4h**

[1,1'-biphenyl]-4-yl(phenyl)methanone (**4i**)

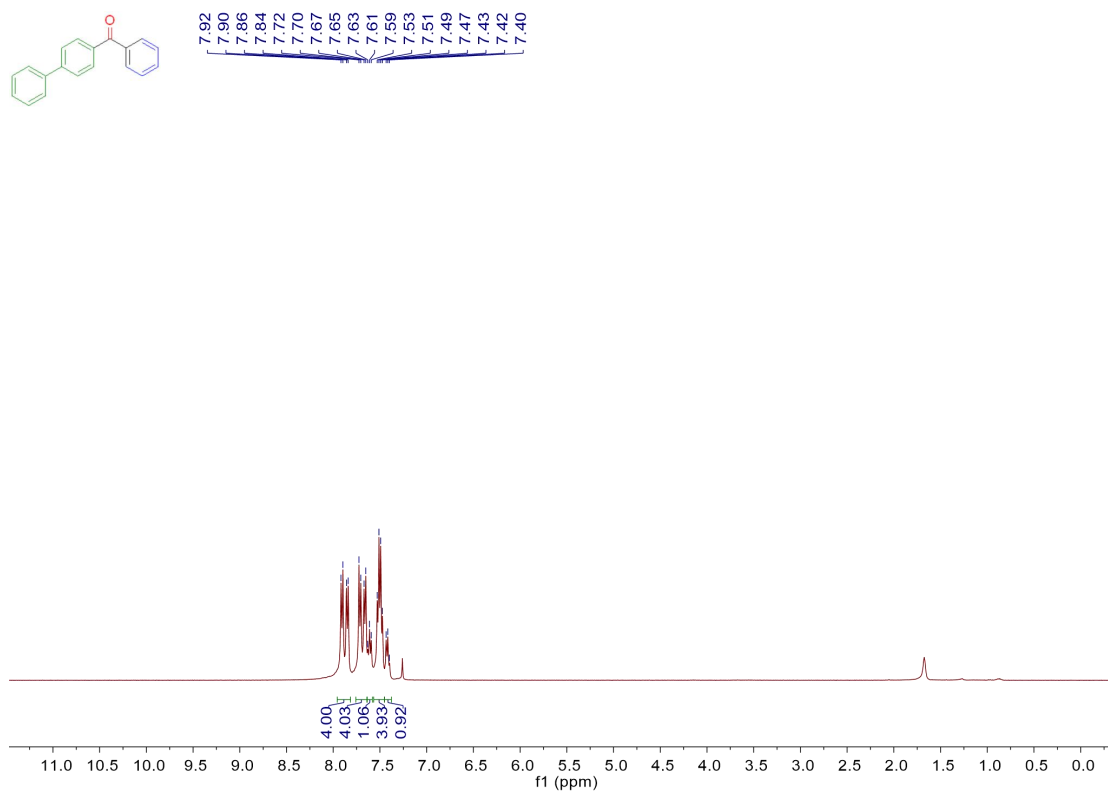

<sup>1</sup>H-NMR (400 MHz, CDCl<sub>3</sub>) of **4i**

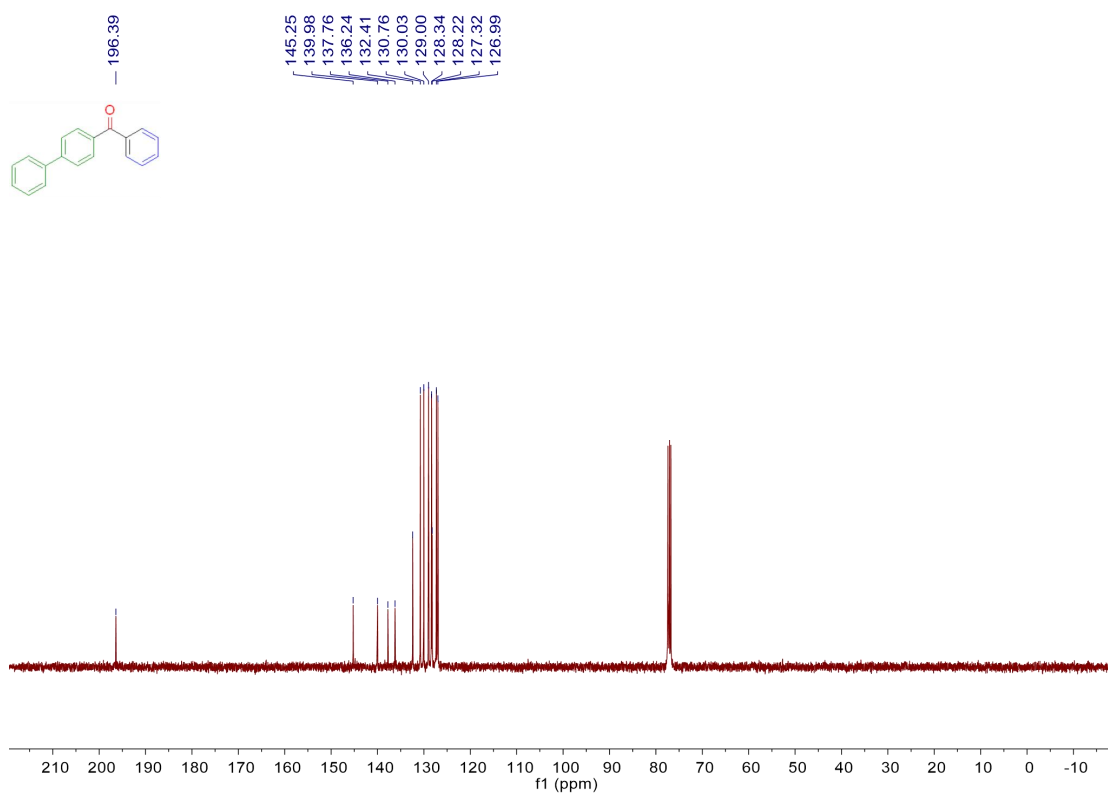

<sup>13</sup>C {<sup>1</sup>H} NMR (100 MHz, CDCl<sub>3</sub>) of **4i**



(4-fluorophenyl)(phenyl)methanone (**4j**)

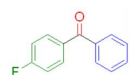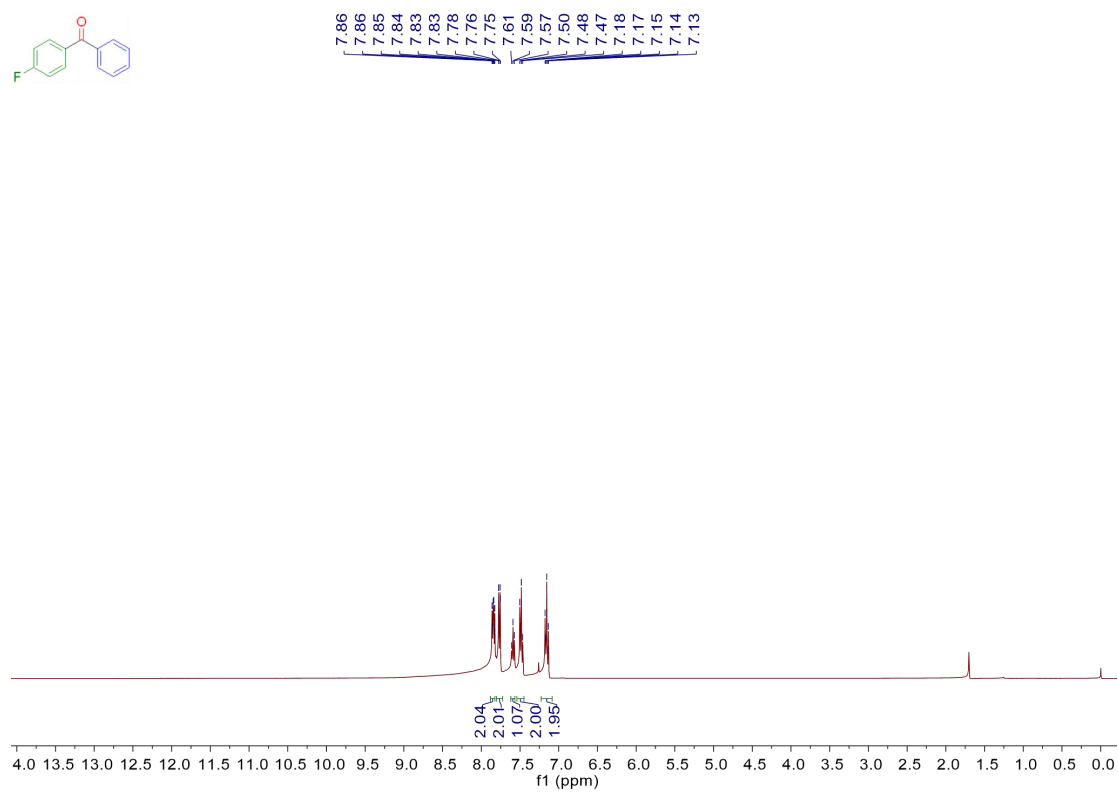

<sup>1</sup>H-NMR (400 MHz, CDCl<sub>3</sub>) of **4j**

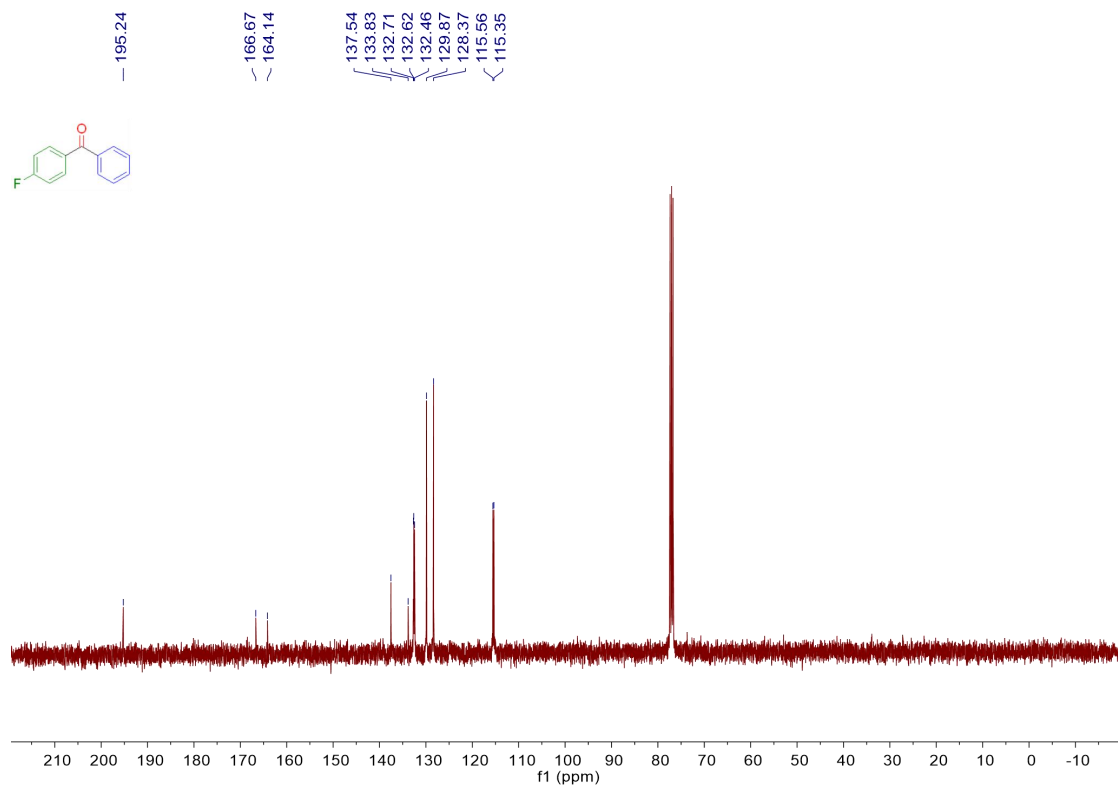

<sup>13</sup>C {<sup>1</sup>H} NMR (100 MHz, CDCl<sub>3</sub>) of **4j**

PXJ-250217-6. 10. fid

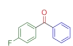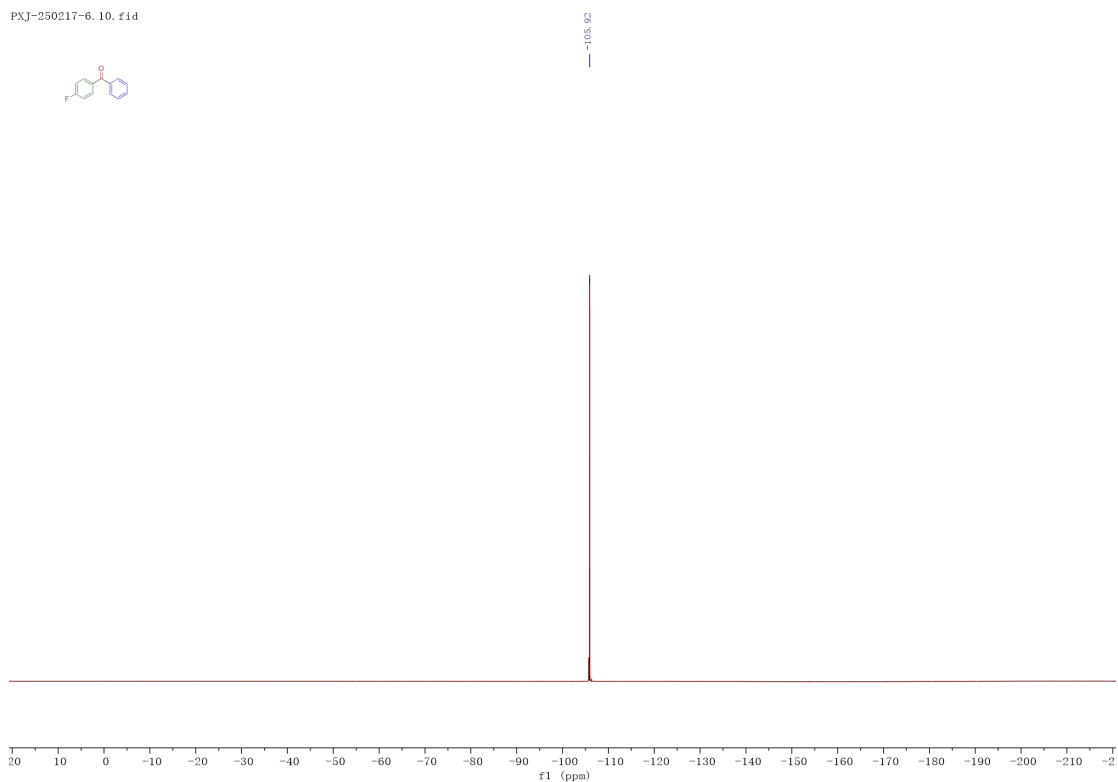

$^{19}\text{F}$  NMR (377 MHz,  $\text{CDCl}_3$ ) of **4j**

(4-chlorophenyl)(phenyl)methanone (**4k**)

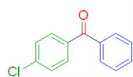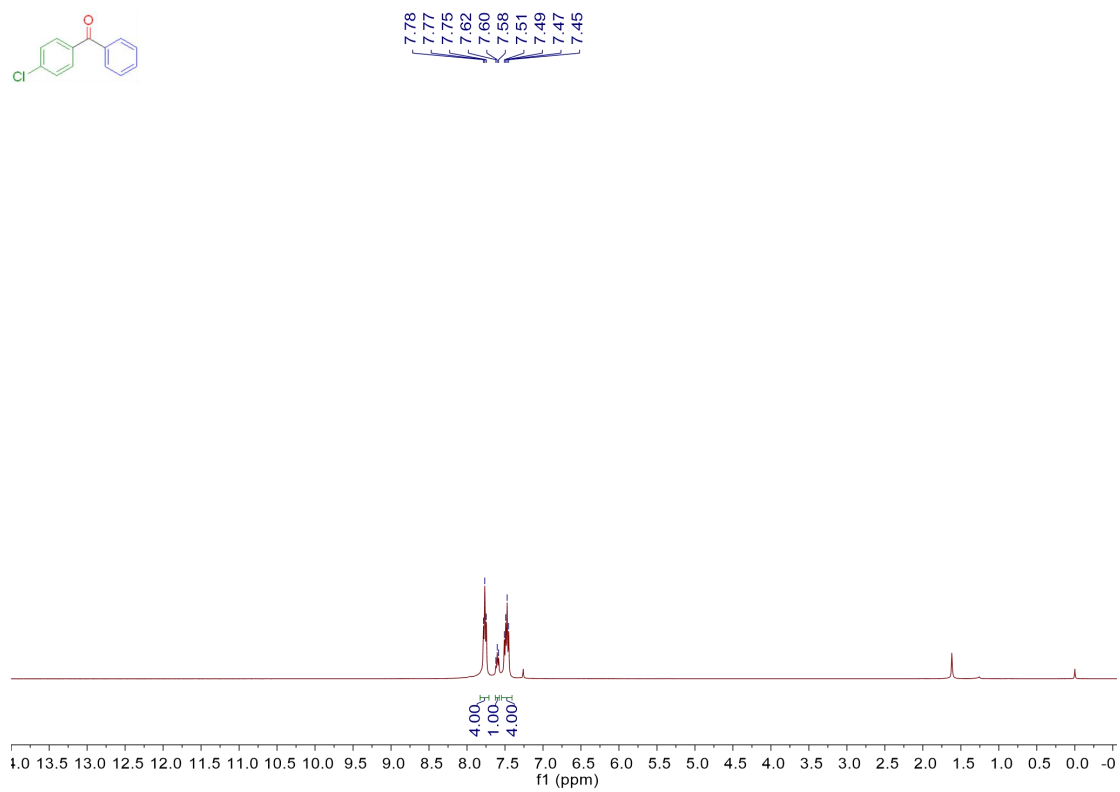

$^1\text{H}$ -NMR (400 MHz,  $\text{CDCl}_3$ ) of **4k**

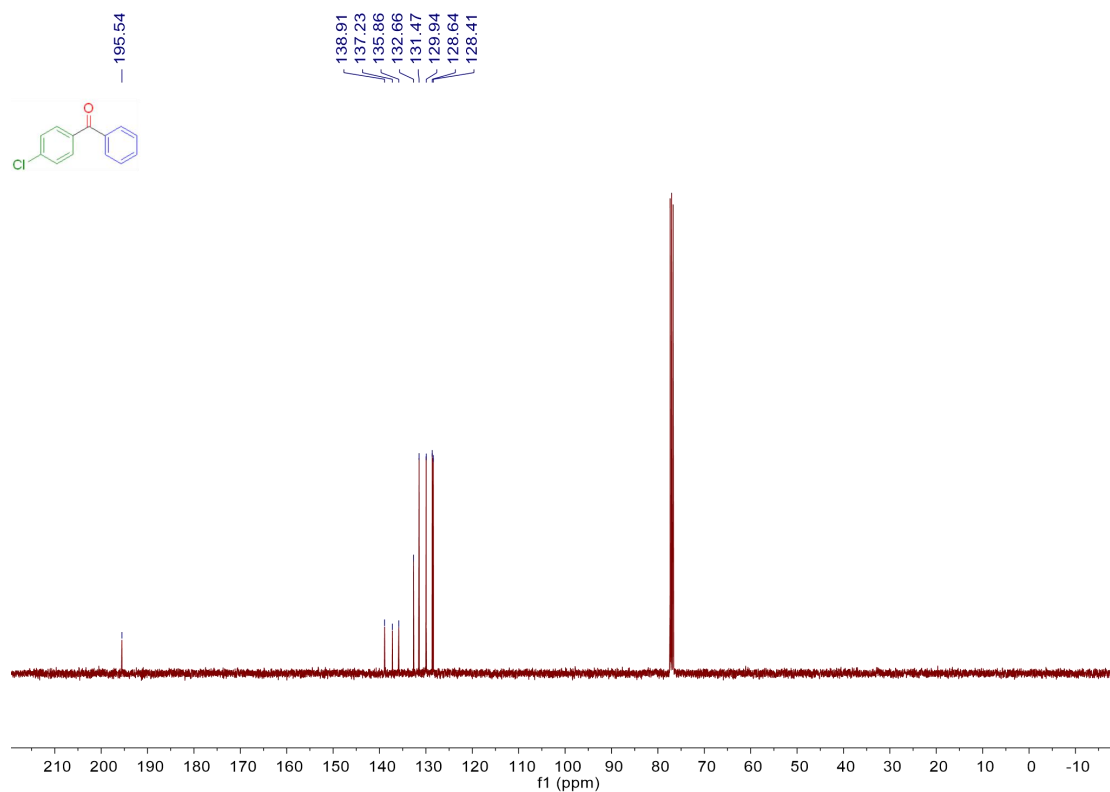

$^{13}\text{C}$  { $^1\text{H}$ } NMR (100 MHz,  $\text{CDCl}_3$ ) of **4k**

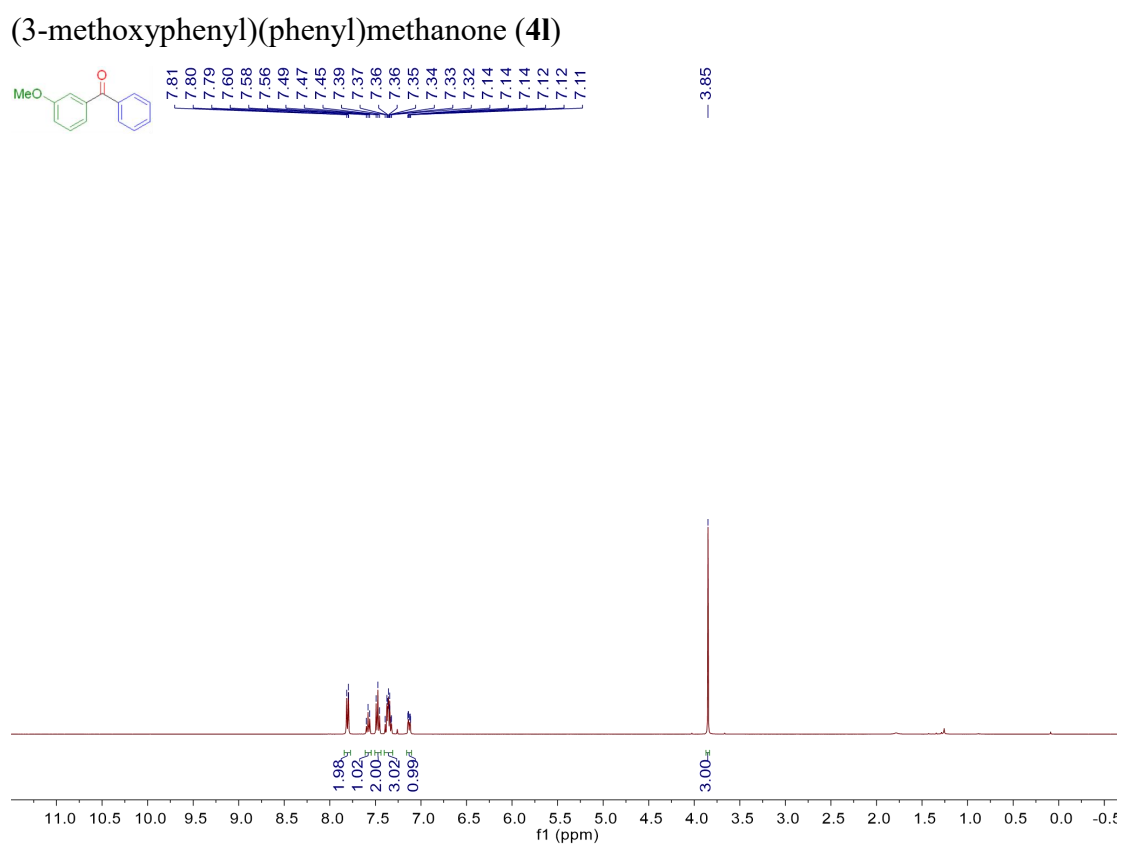

$^1\text{H}$ -NMR (400 MHz,  $\text{CDCl}_3$ ) of **4l**

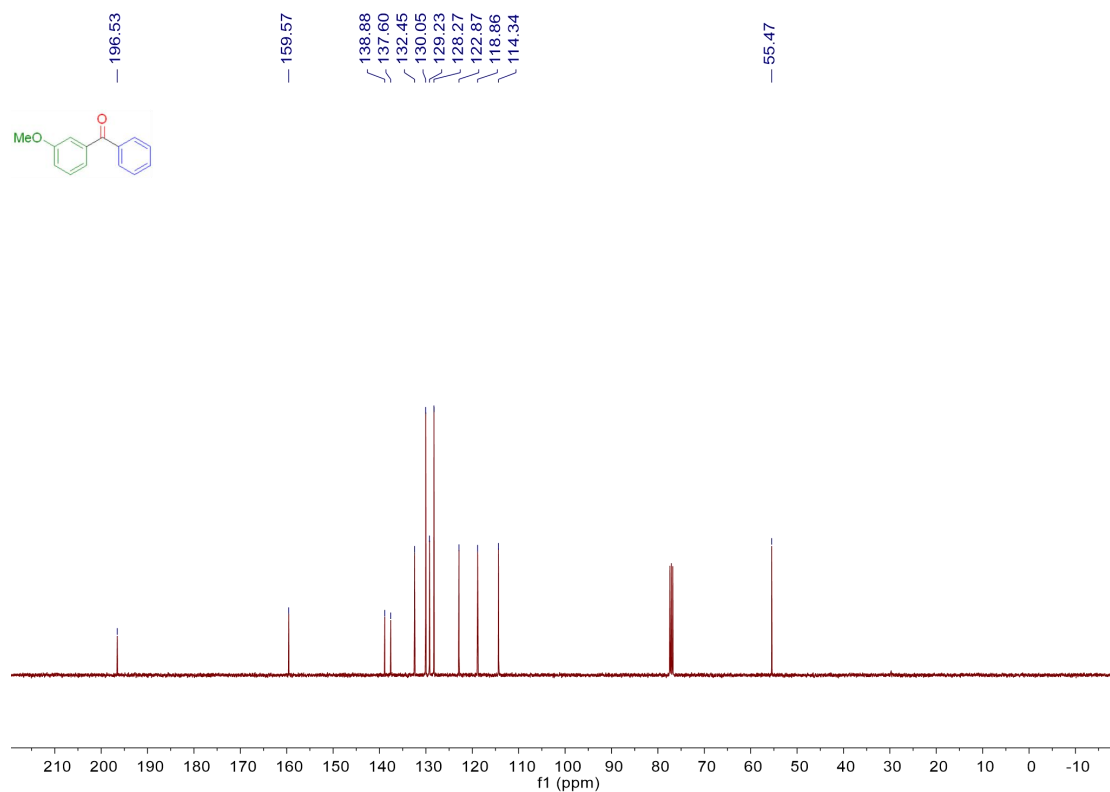

$^{13}\text{C}$   $\{^1\text{H}\}$  NMR (100 MHz,  $\text{CDCl}_3$ ) of **4l**

(3-hydroxyphenyl)(phenyl)methanone (**4m**)

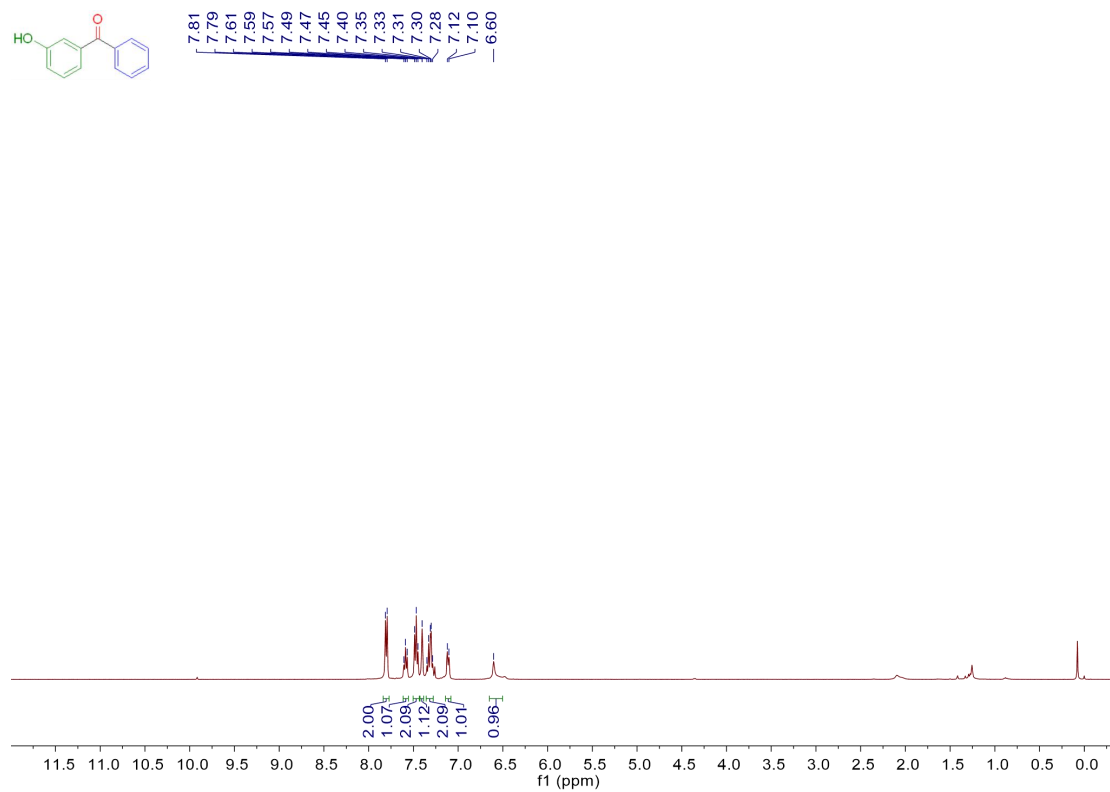

$^1\text{H}$ -NMR (400 MHz,  $\text{CDCl}_3$ ) of **4m**

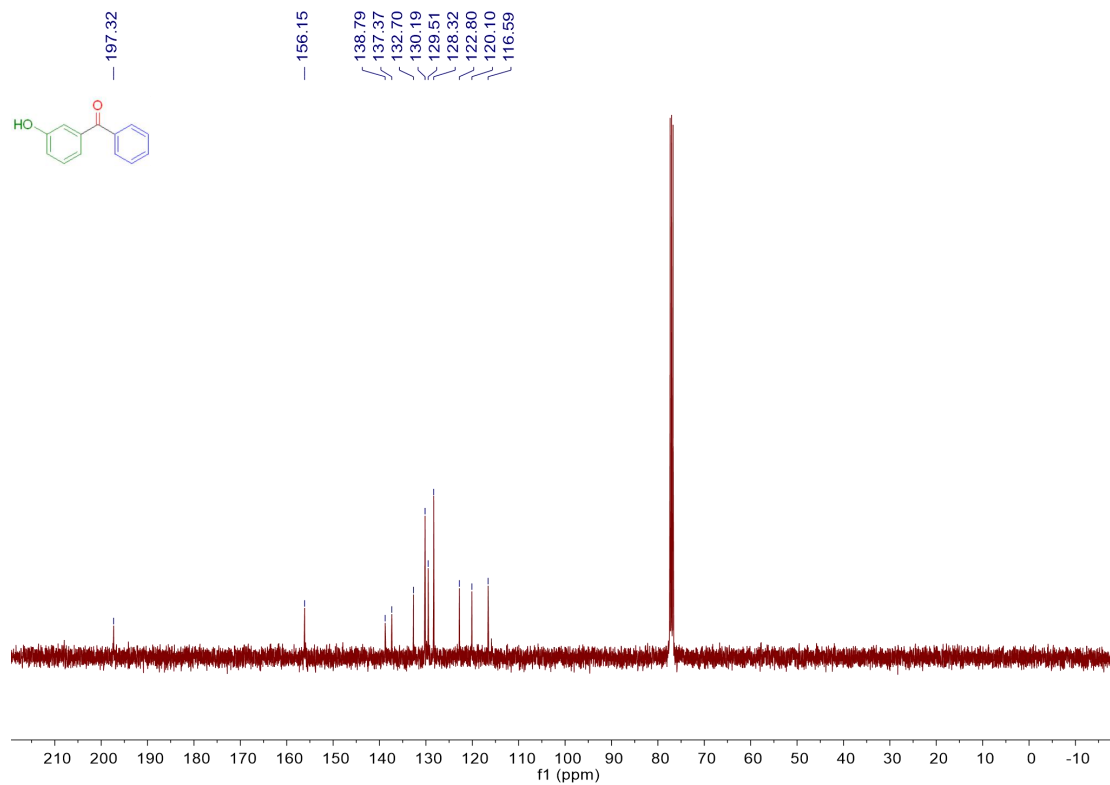

$^{13}\text{C}$   $\{^1\text{H}\}$  NMR (100 MHz,  $\text{CDCl}_3$ ) of **4m**

phenyl(o-tolyl)methanone (**4n**)

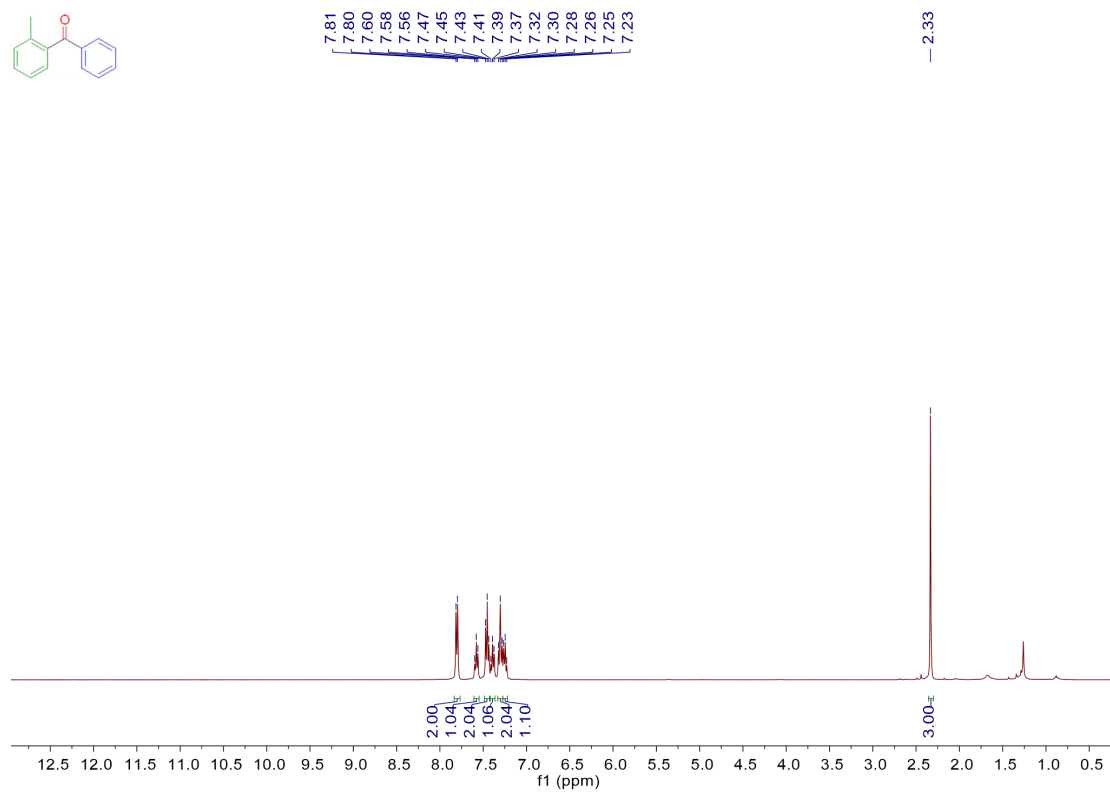

$^1\text{H}$ -NMR (400 MHz,  $\text{CDCl}_3$ ) of **4n**

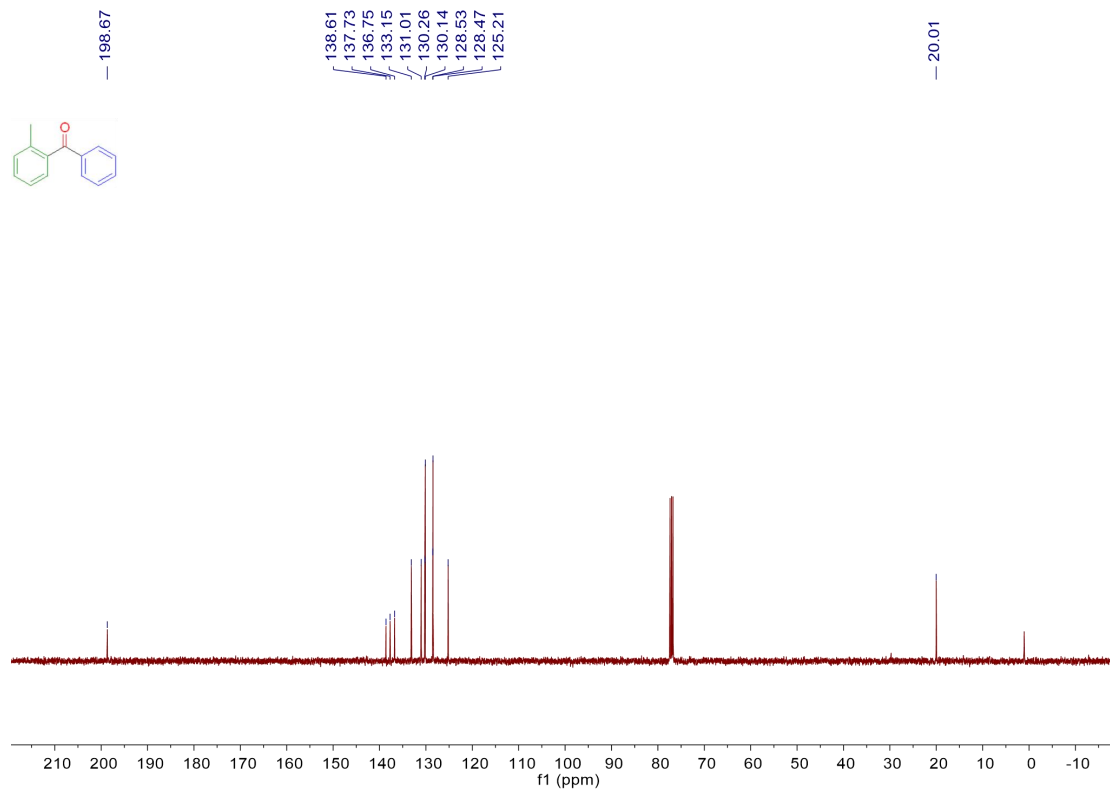

$^{13}\text{C}$   $\{^1\text{H}\}$  NMR (100 MHz,  $\text{CDCl}_3$ ) of **4n**

(3,4-difluorophenyl)(phenyl)methanone (**4o**)

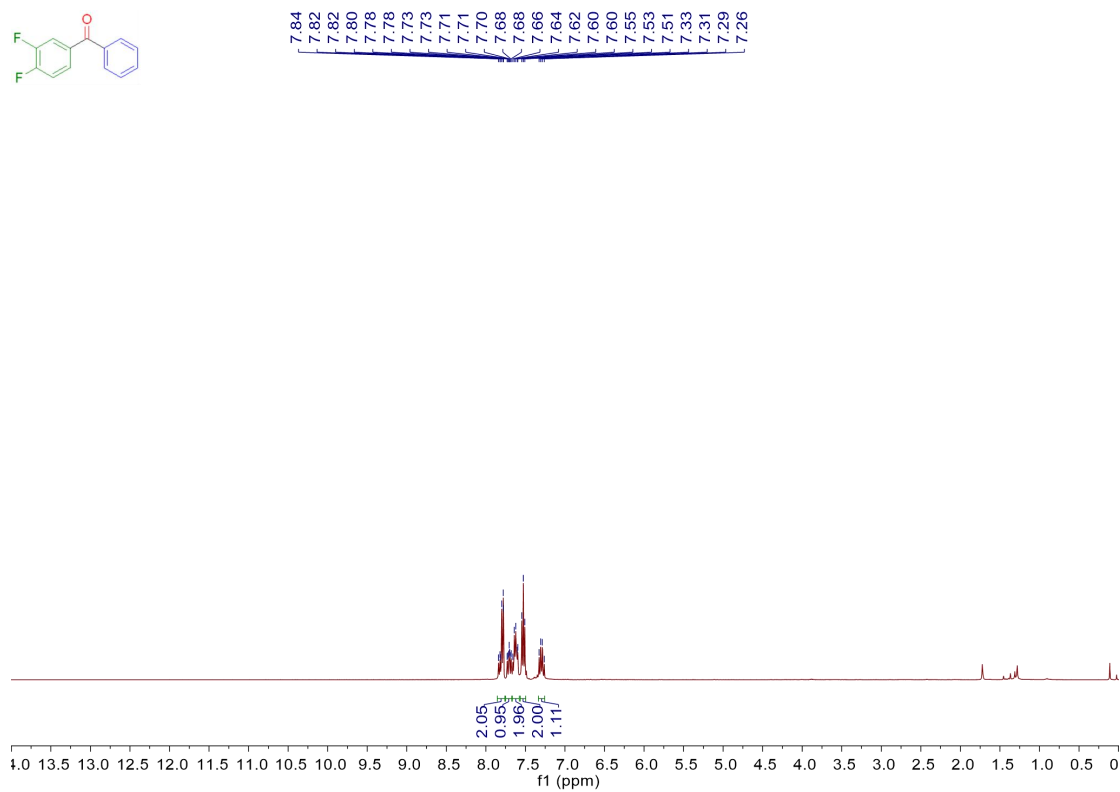

$^1\text{H}$ -NMR (400 MHz,  $\text{CDCl}_3$ ) of **4o**

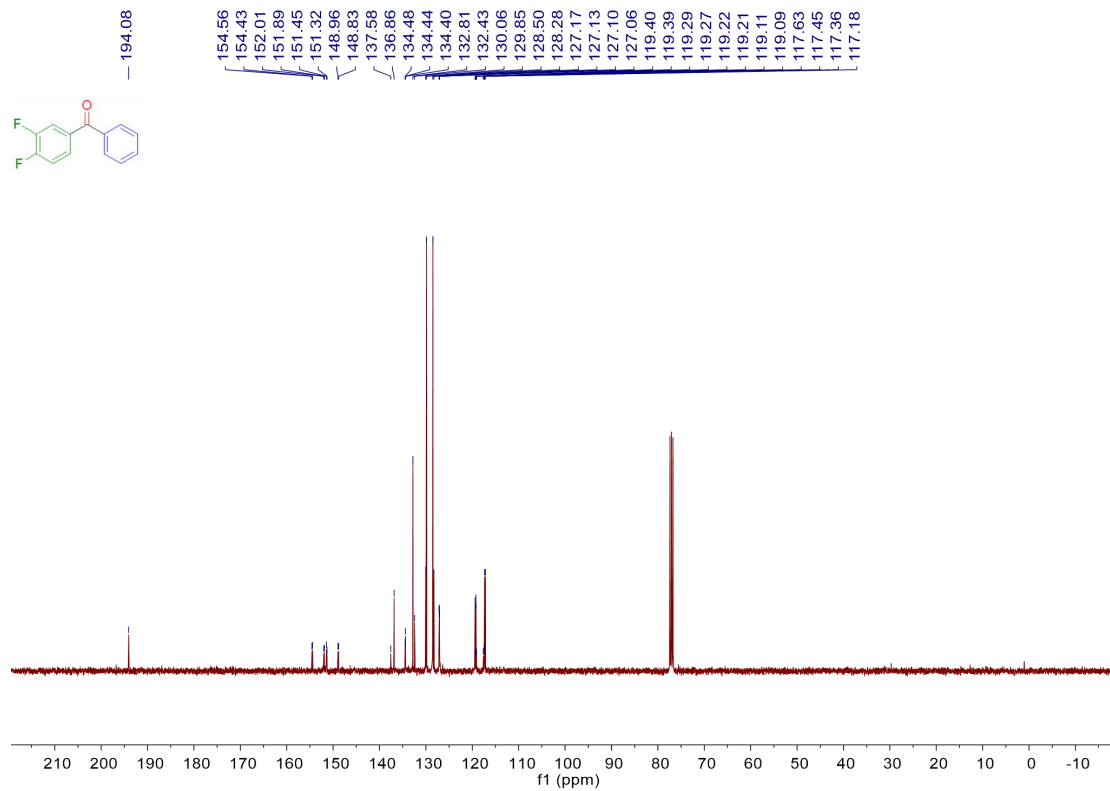

PXJ-250217-5. 10. fid

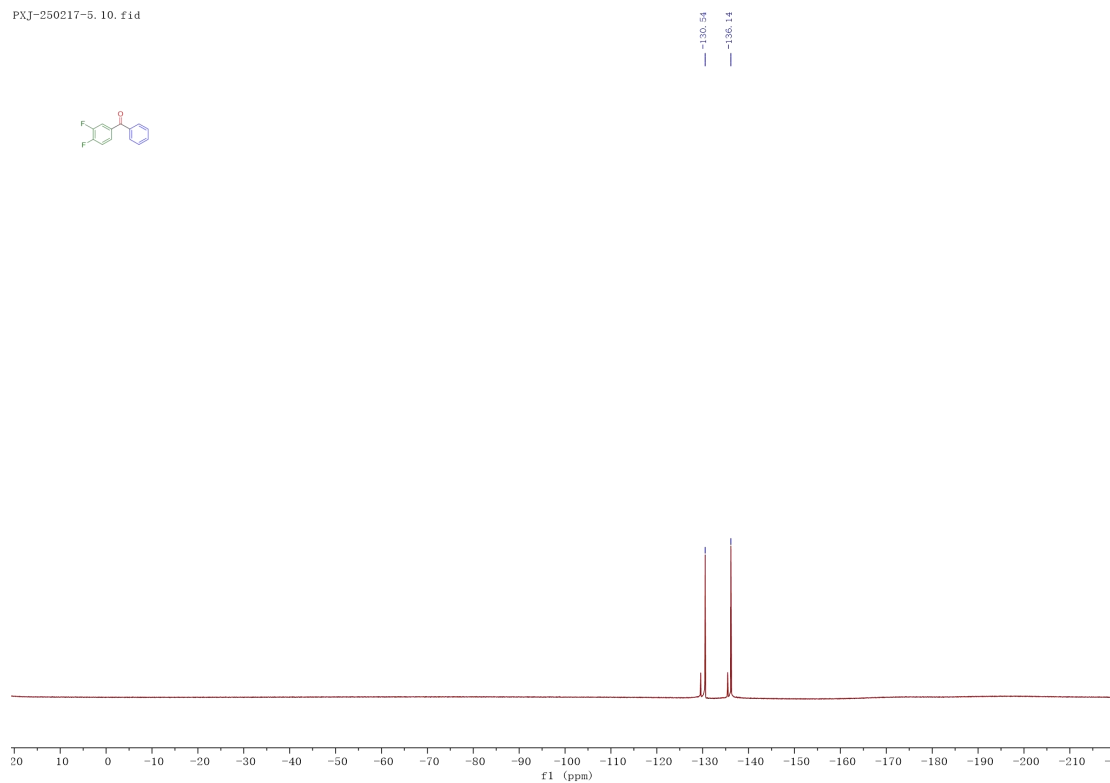

naphthalen-1-yl(phenyl)methanone (**4p**)

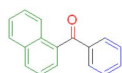

8.16  
8.14  
8.06  
8.04  
7.98  
7.96  
7.93  
7.91  
7.66  
7.64  
7.62  
7.60  
7.58  
7.57  
7.56  
7.55  
7.52  
7.52  
7.50  
7.48

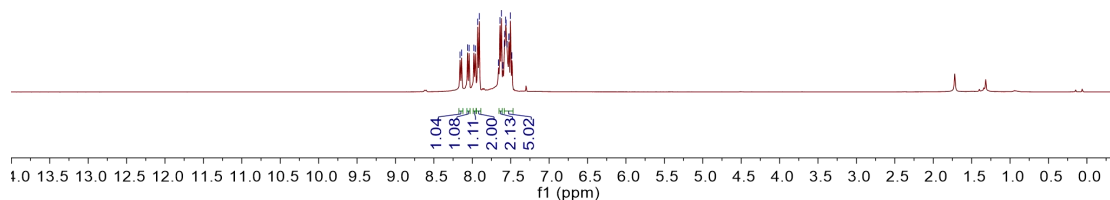

<sup>1</sup>H-NMR (400 MHz, CDCl<sub>3</sub>) of **4p**

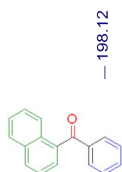

198.12

138.42  
136.45  
133.81  
133.33  
131.37  
131.06  
130.50  
128.55  
127.86  
127.35  
126.66  
126.56  
125.79  
124.44

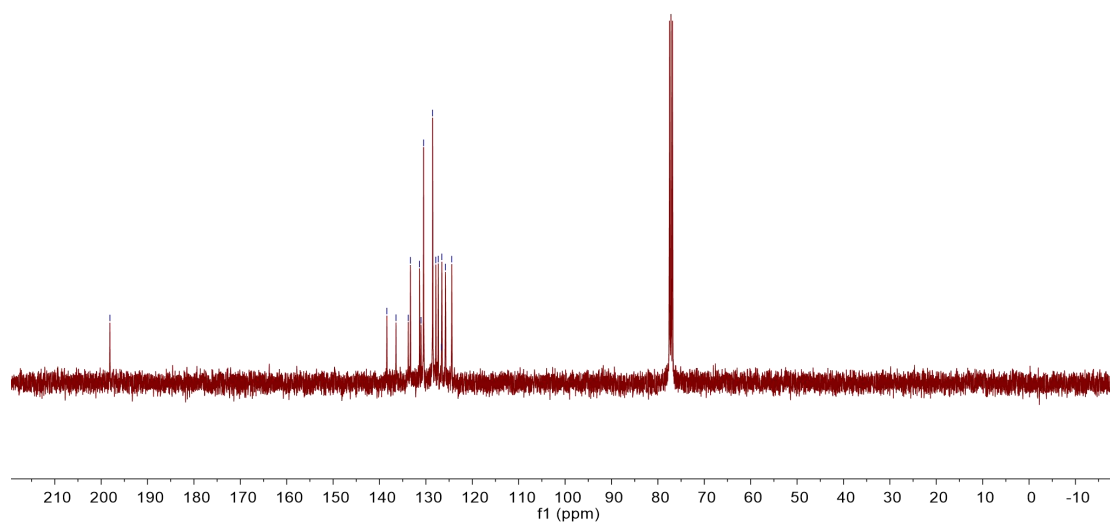

<sup>13</sup>C {<sup>1</sup>H} NMR (100 MHz, CDCl<sub>3</sub>) of **4p**



naphthalen-2-yl(phenyl)methanone (**4q**)

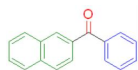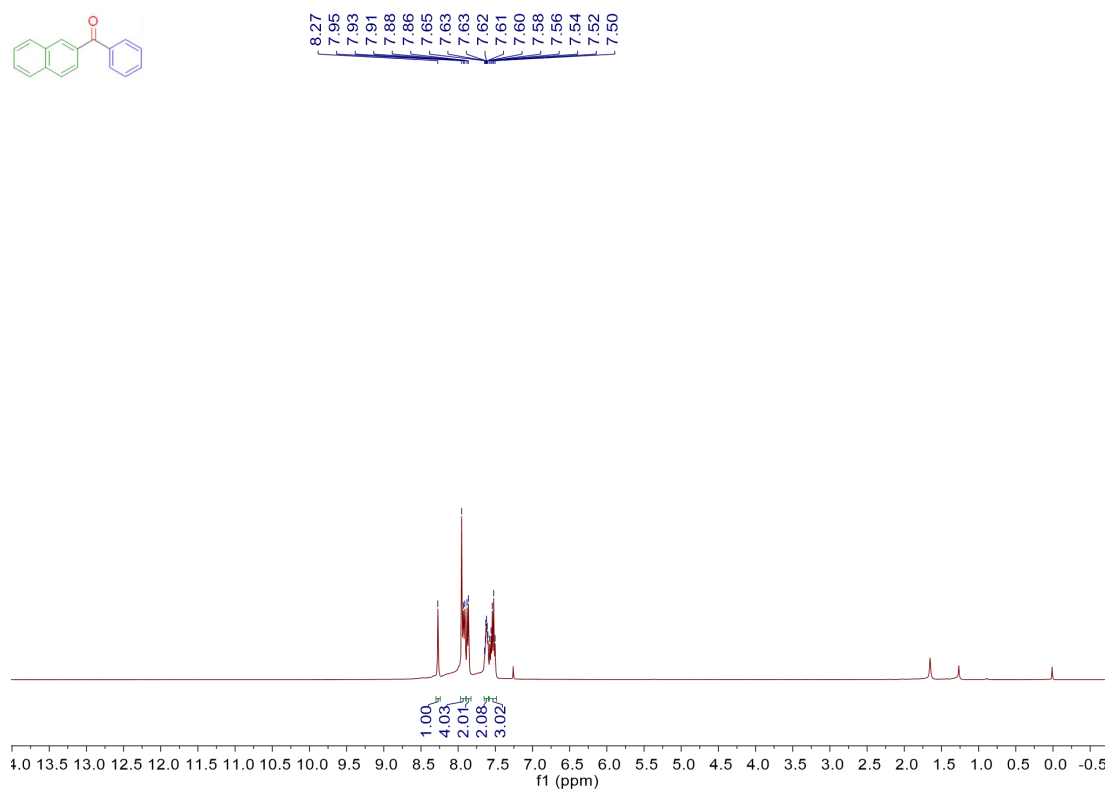

<sup>1</sup>H-NMR (400 MHz, CDCl<sub>3</sub>) of **4q**

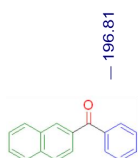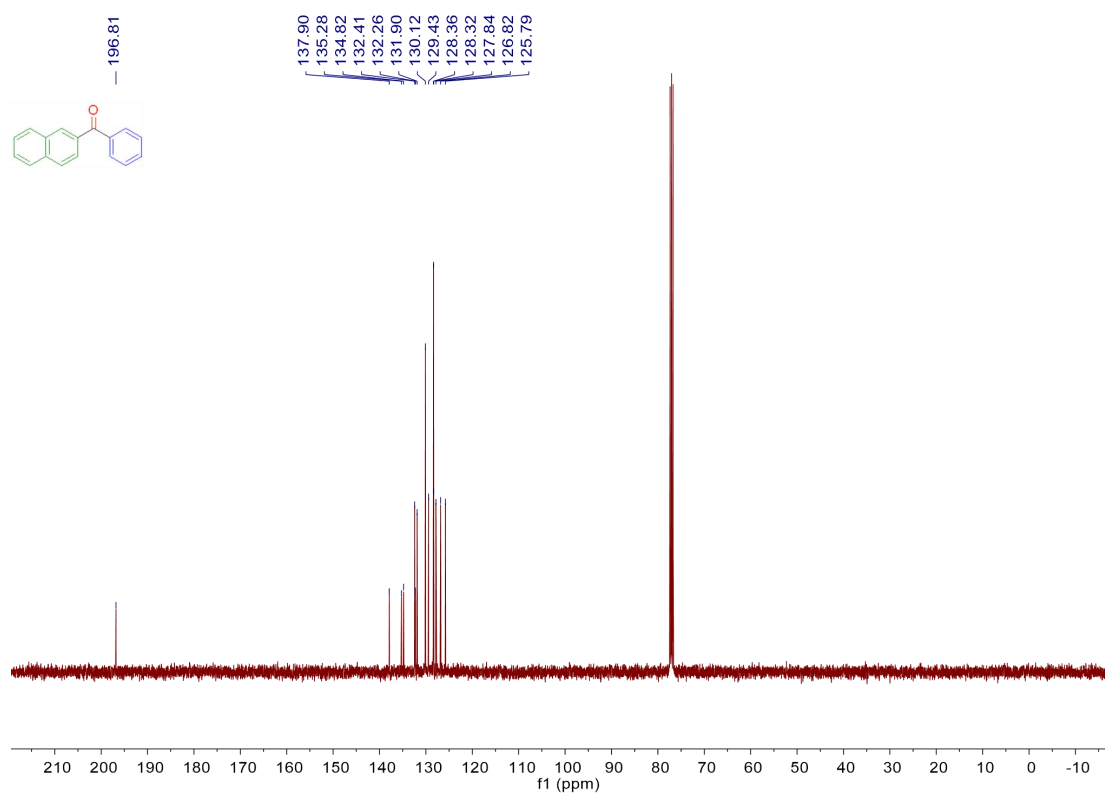

<sup>13</sup>C {<sup>1</sup>H} NMR (100 MHz, CDCl<sub>3</sub>) of **4q**

phenanthren-9-yl(phenyl)methanone (**4r**).

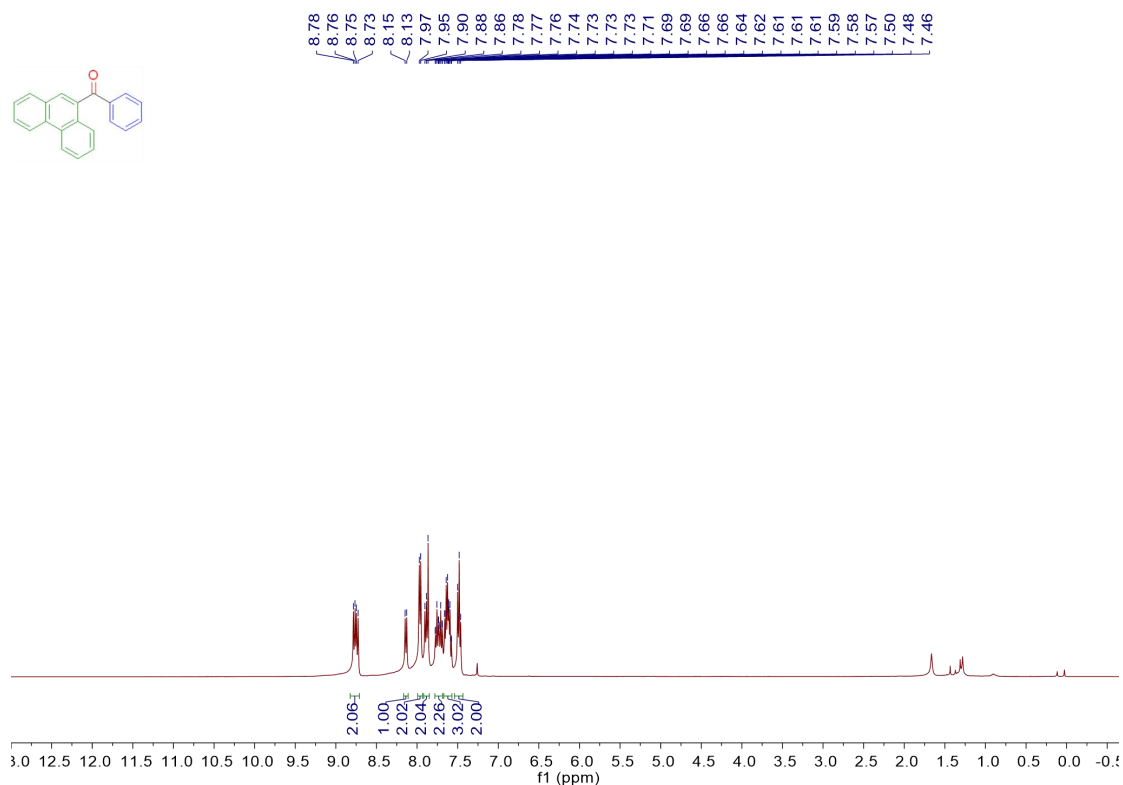

<sup>1</sup>H-NMR (400 MHz, CDCl<sub>3</sub>) of **4r**

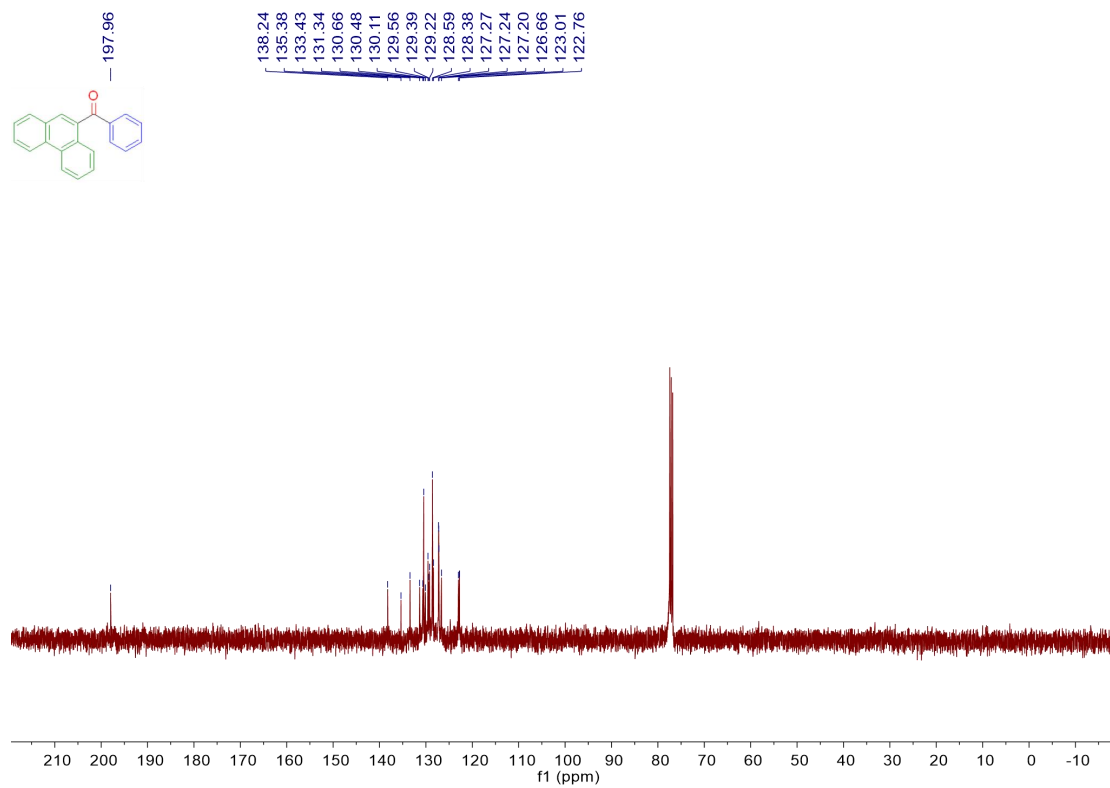

<sup>13</sup>C {<sup>1</sup>H} NMR (100 MHz, CDCl<sub>3</sub>) of **4r**

(9H-fluoren-2-yl)(phenyl)methanone (**4s**)

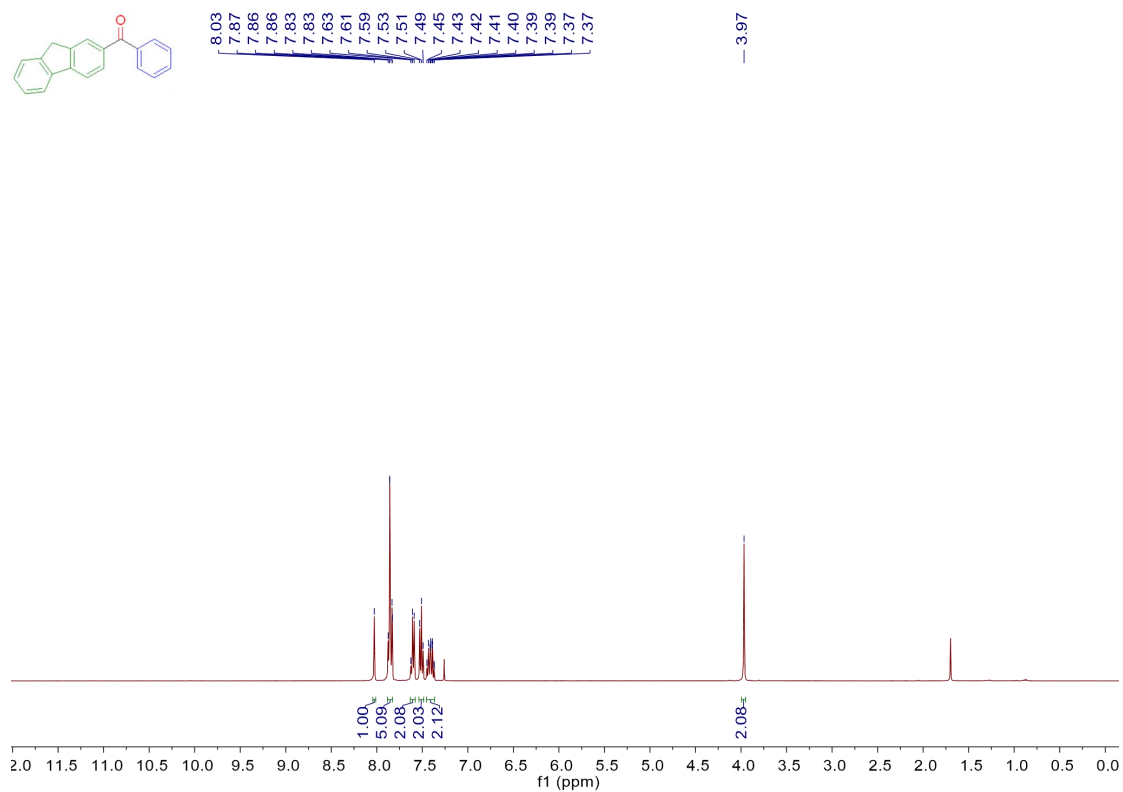

$^1\text{H-NMR}$  (400 MHz,  $\text{CDCl}_3$ ) of **4s**

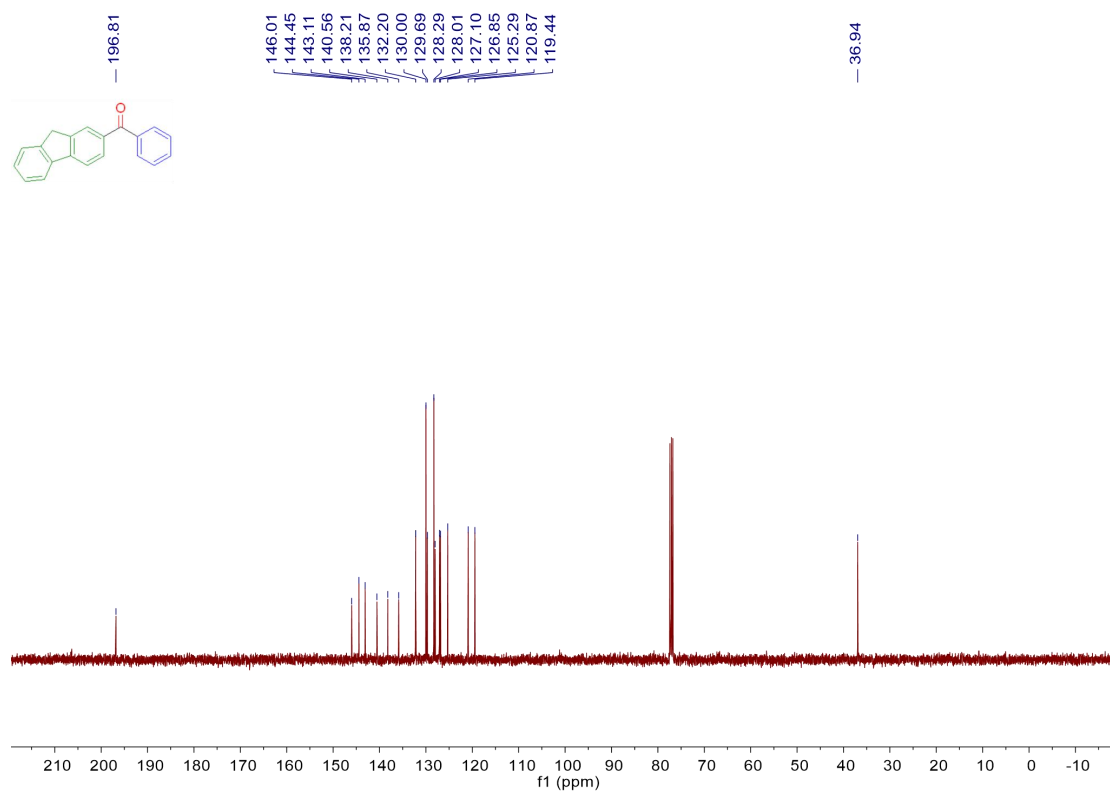

$^{13}\text{C} \{^1\text{H}\}$  NMR (100 MHz,  $\text{CDCl}_3$ ) of **4s**

phenyl(quinolin-6-yl)methanone (**4t**)

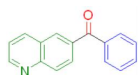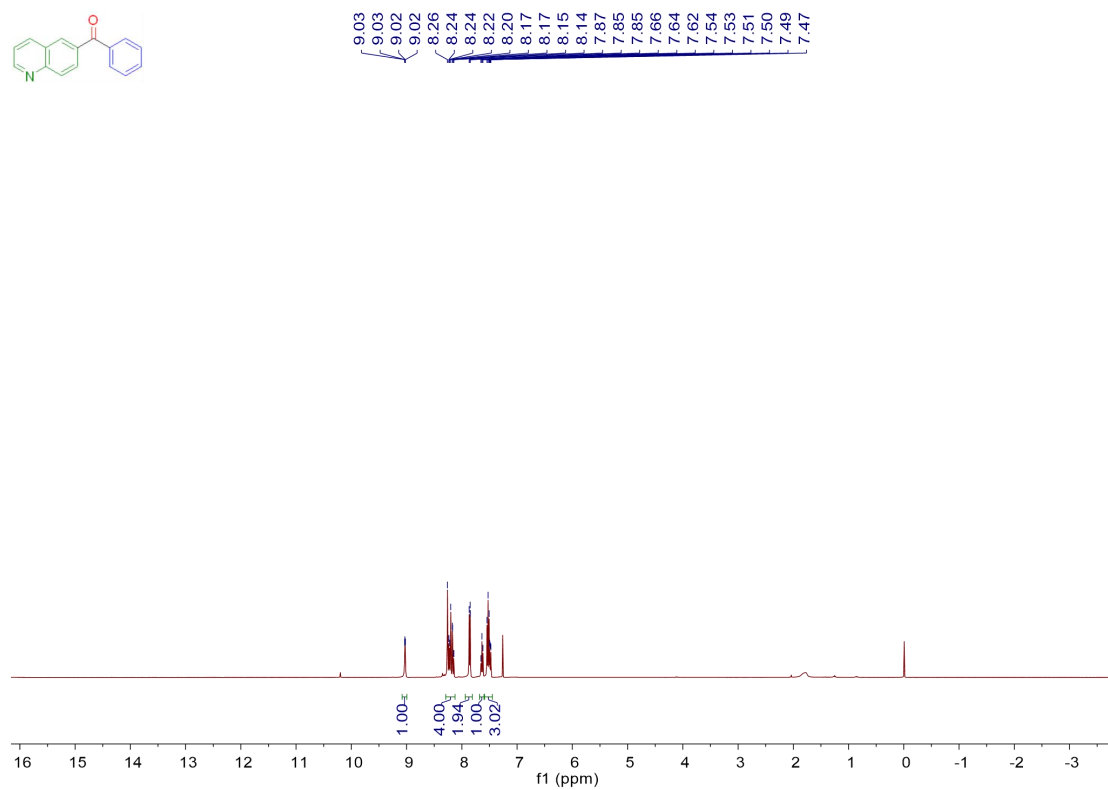

<sup>1</sup>H-NMR (400 MHz, CDCl<sub>3</sub>) of **4t**

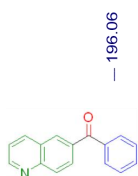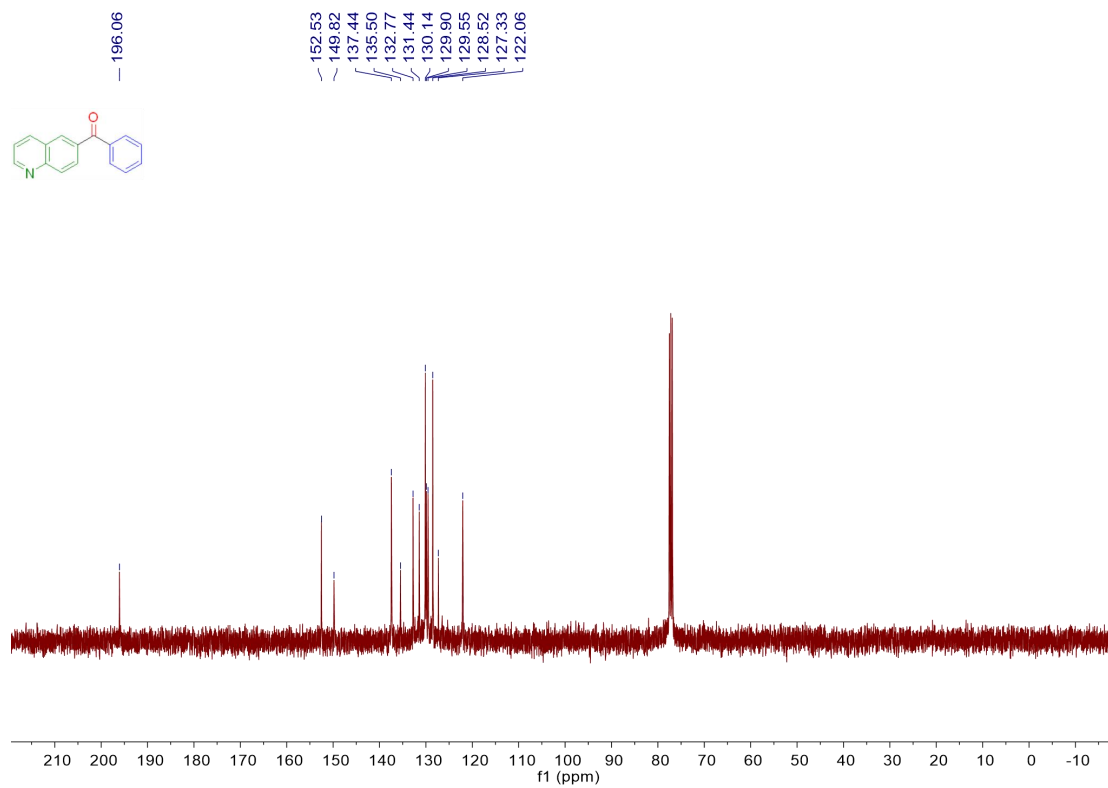

<sup>13</sup>C {<sup>1</sup>H} NMR (100 MHz, CDCl<sub>3</sub>) of **4t**

phenyl(thiophen-3-yl)methanone (**4u**)

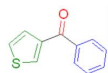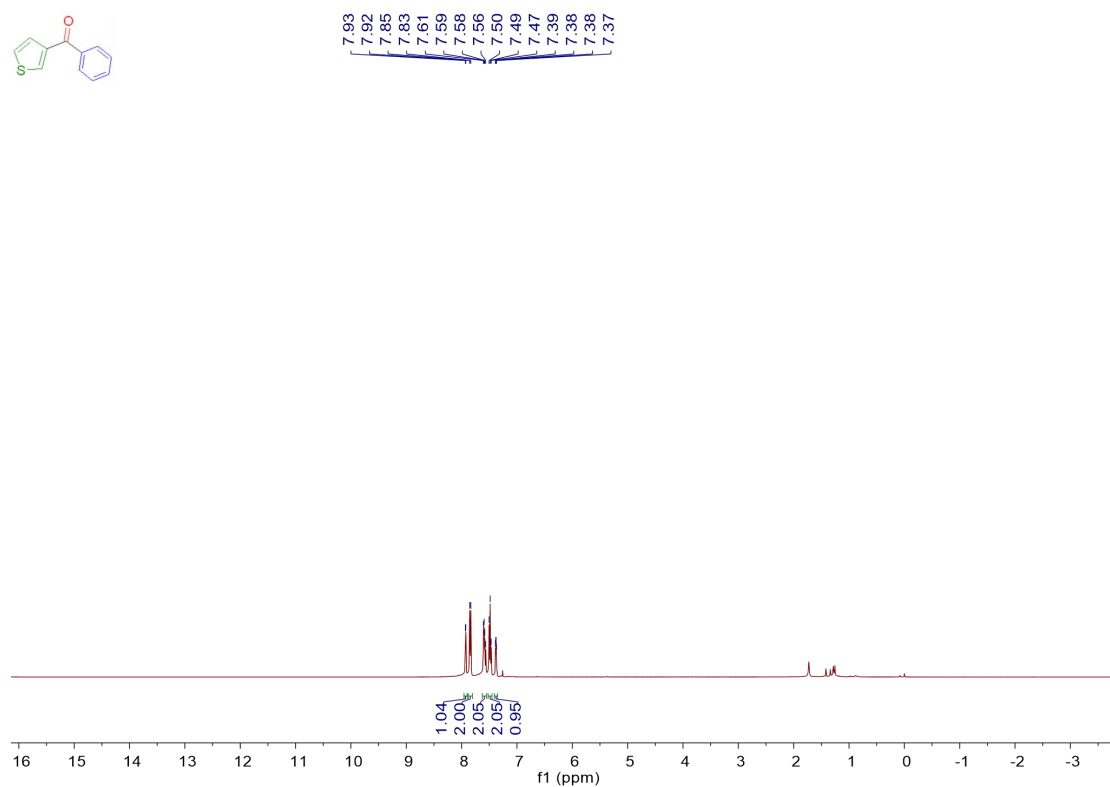

<sup>1</sup>H-NMR (400 MHz, CDCl<sub>3</sub>) of **4u**

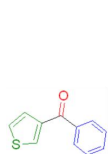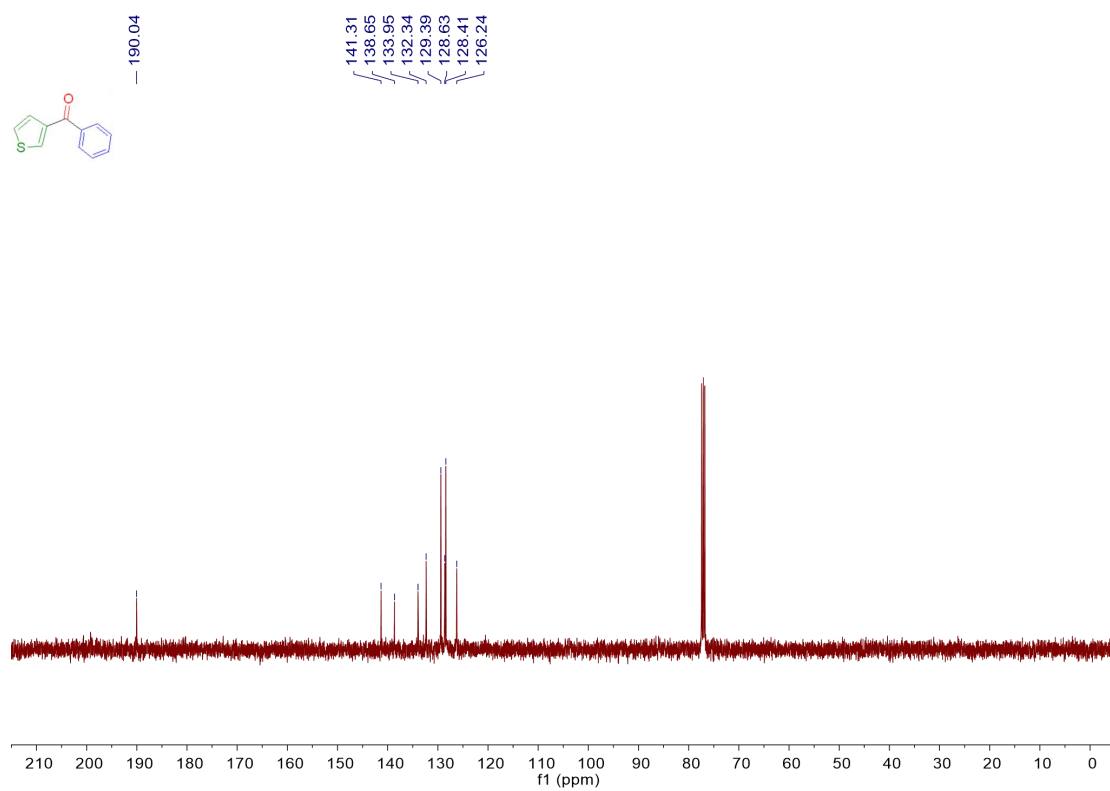

<sup>13</sup>C {<sup>1</sup>H} NMR (100 MHz, CDCl<sub>3</sub>) of **4u**

(1H-indole-1,5-diyl)bis(phenylmethanone) (**4v**)

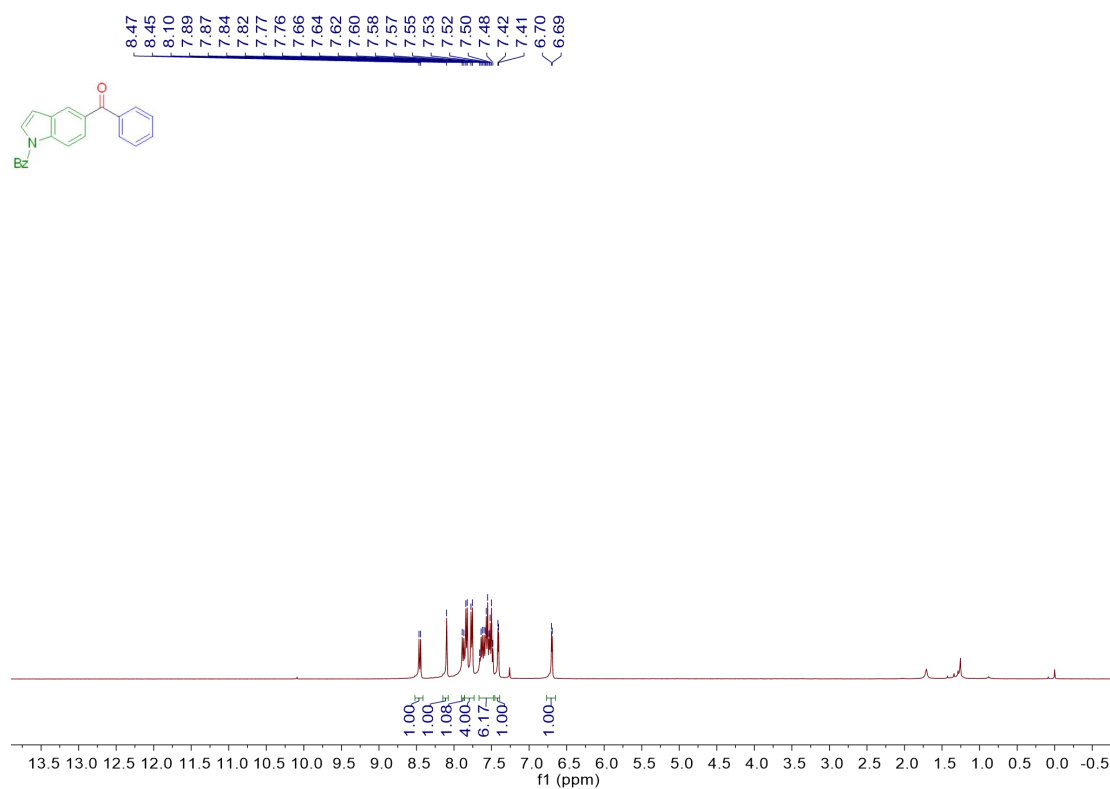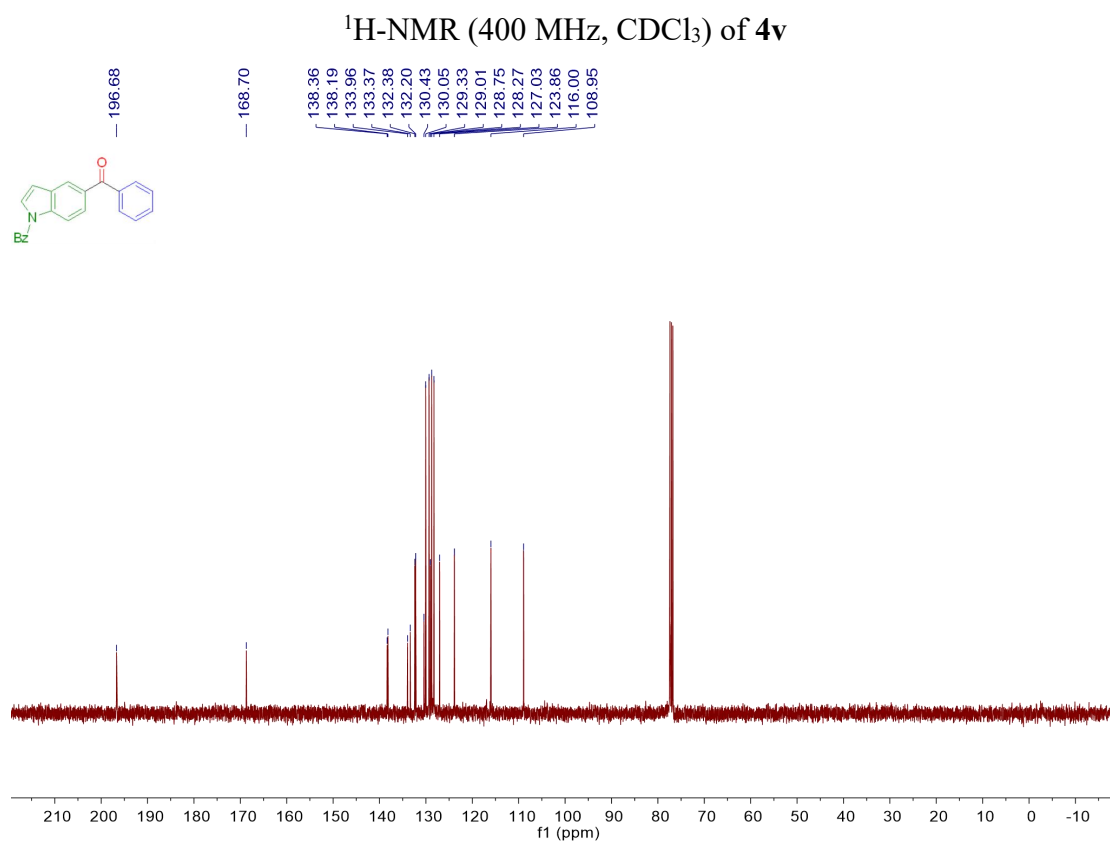

(2-methyl-2H-indazol-5-yl)(phenyl)methanone (**4w**)

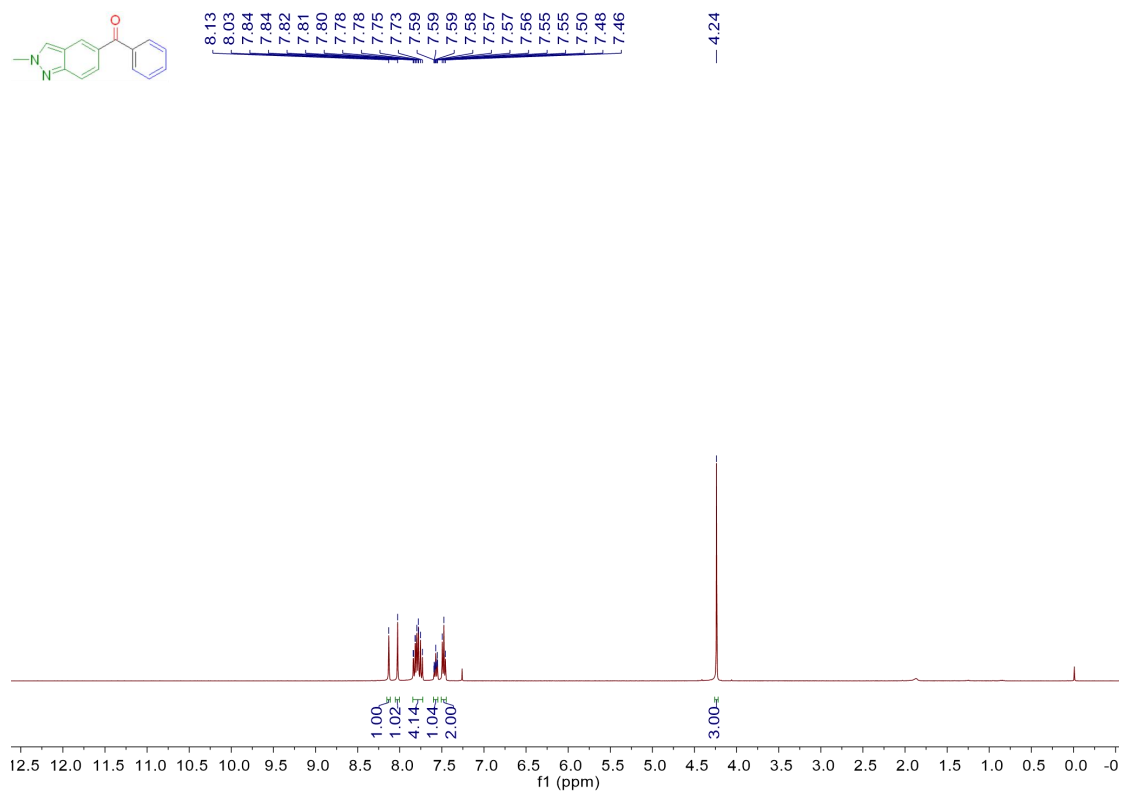

<sup>1</sup>H-NMR (400 MHz, CDCl<sub>3</sub>) of **4w**

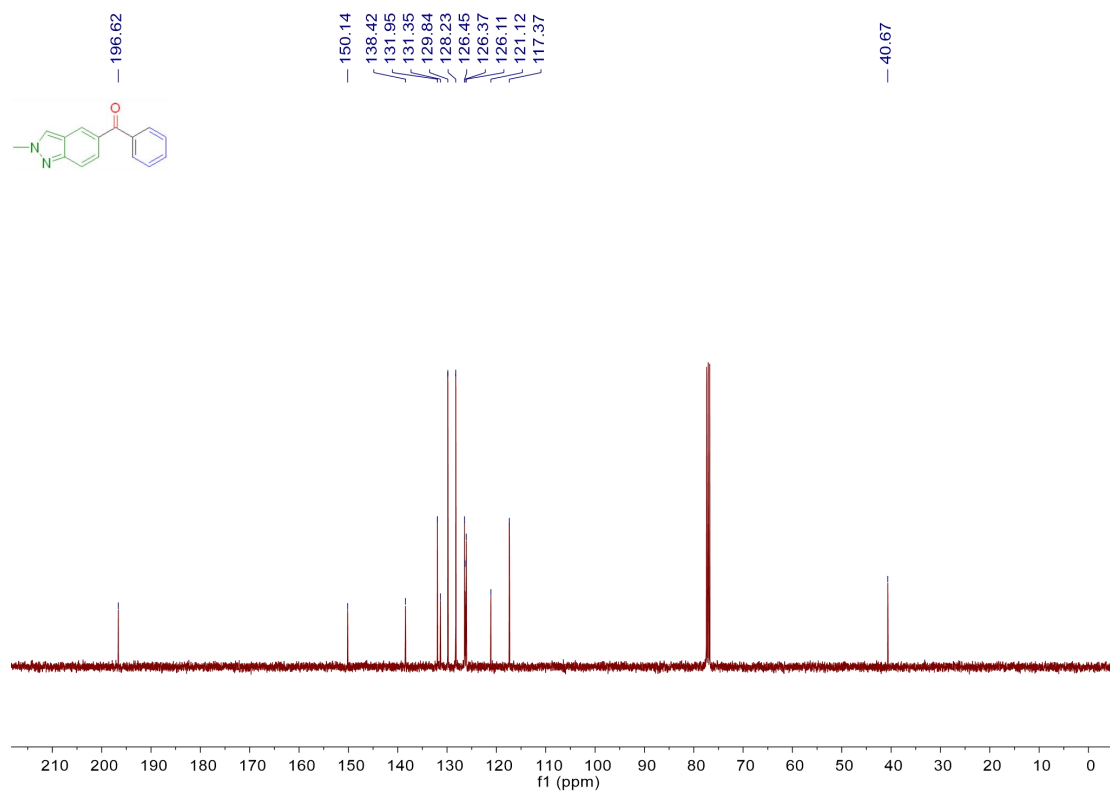

<sup>13</sup>C {<sup>1</sup>H} NMR (100 MHz, CDCl<sub>3</sub>) of **4w**

(2,3-dihydrobenzofuran-5-yl)(phenyl)methanone (**4x**)

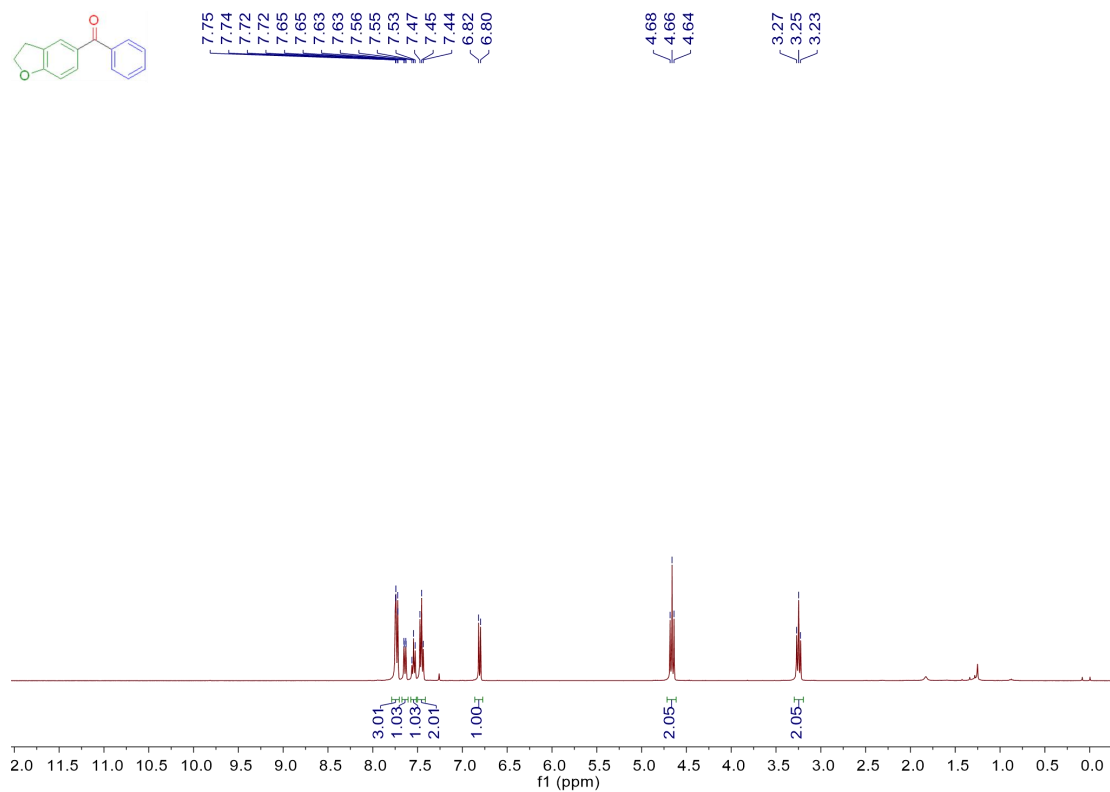

<sup>1</sup>H-NMR (400 MHz, CDCl<sub>3</sub>) of **4x**

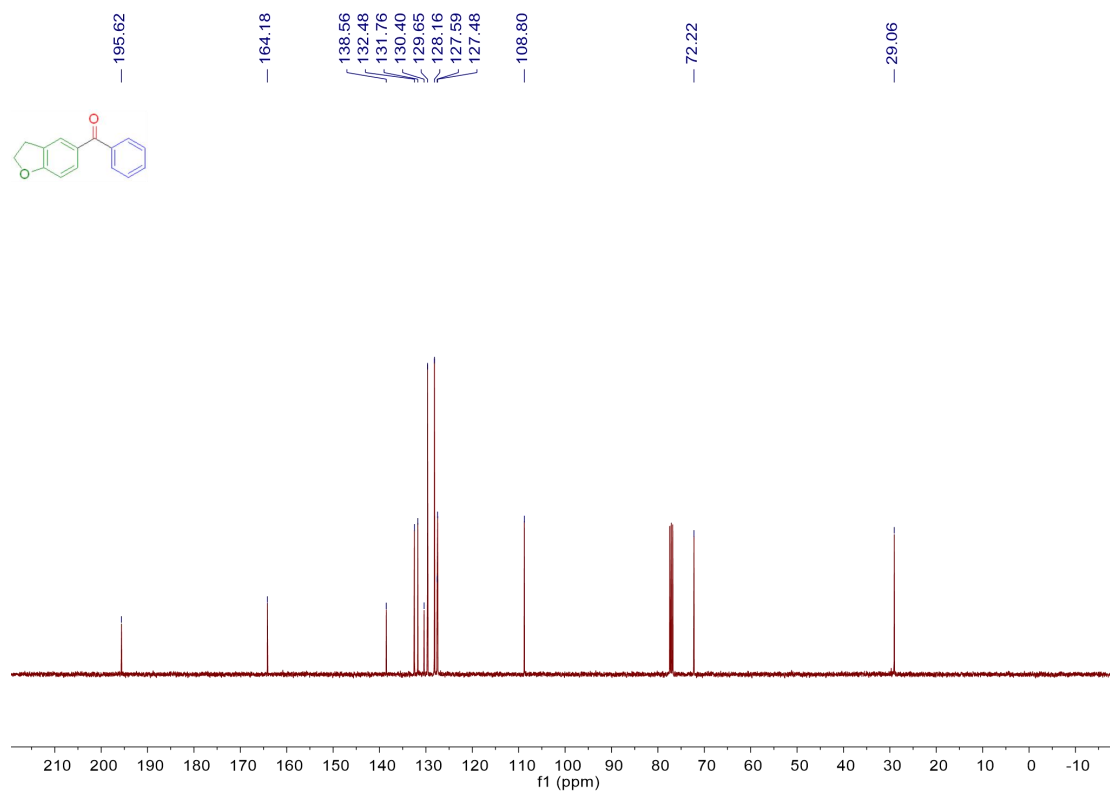

<sup>13</sup>C {<sup>1</sup>H} NMR (100 MHz, CDCl<sub>3</sub>) of **4x**



benzo[d][1,3]dioxol-5-yl(phenyl)methanone (**4y**).

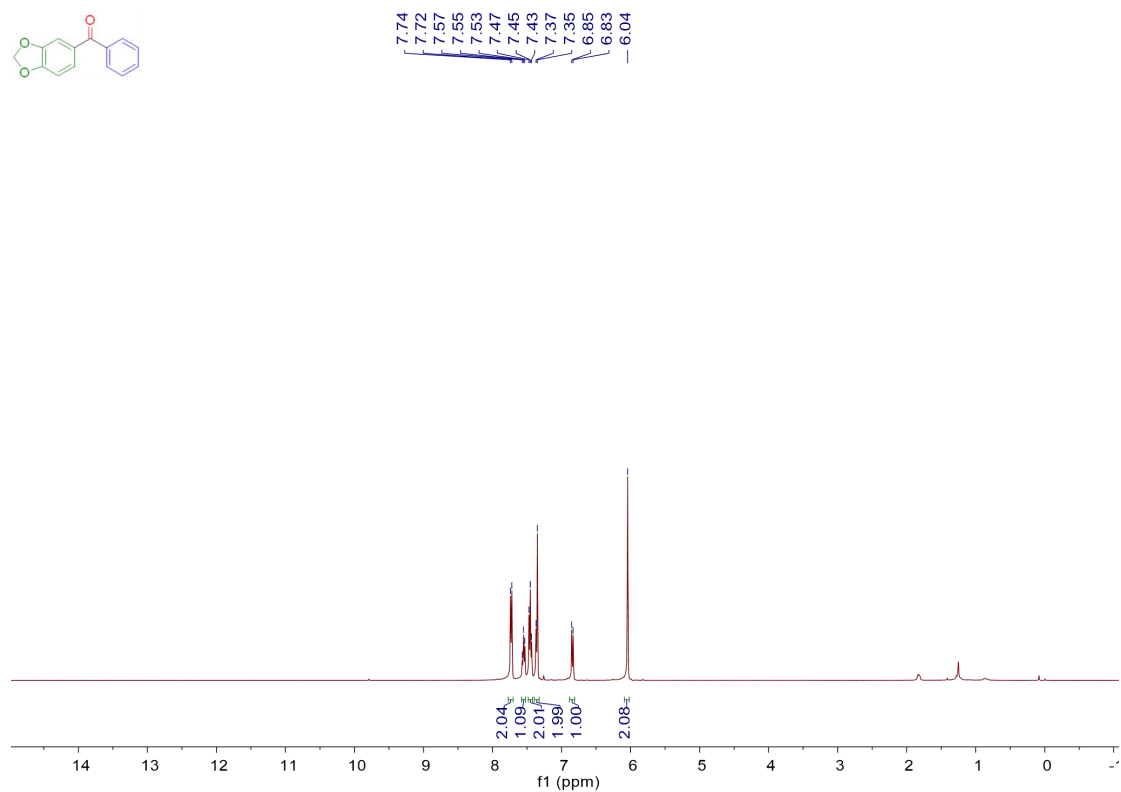

<sup>1</sup>H-NMR (400 MHz, CDCl<sub>3</sub>) of **4y**

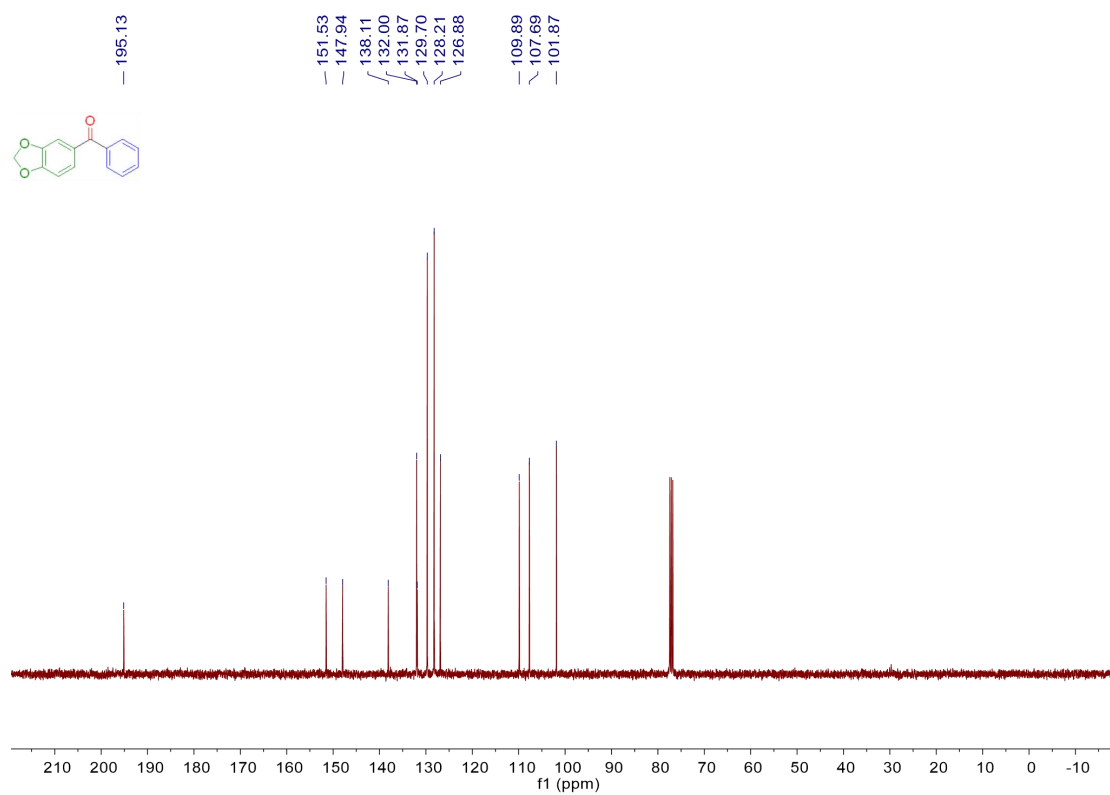

<sup>13</sup>C {<sup>1</sup>H} NMR (100 MHz, CDCl<sub>3</sub>) of **4y**

phenyl(9-phenyl-9H-carbazol-3-yl)methanone (**4z**).

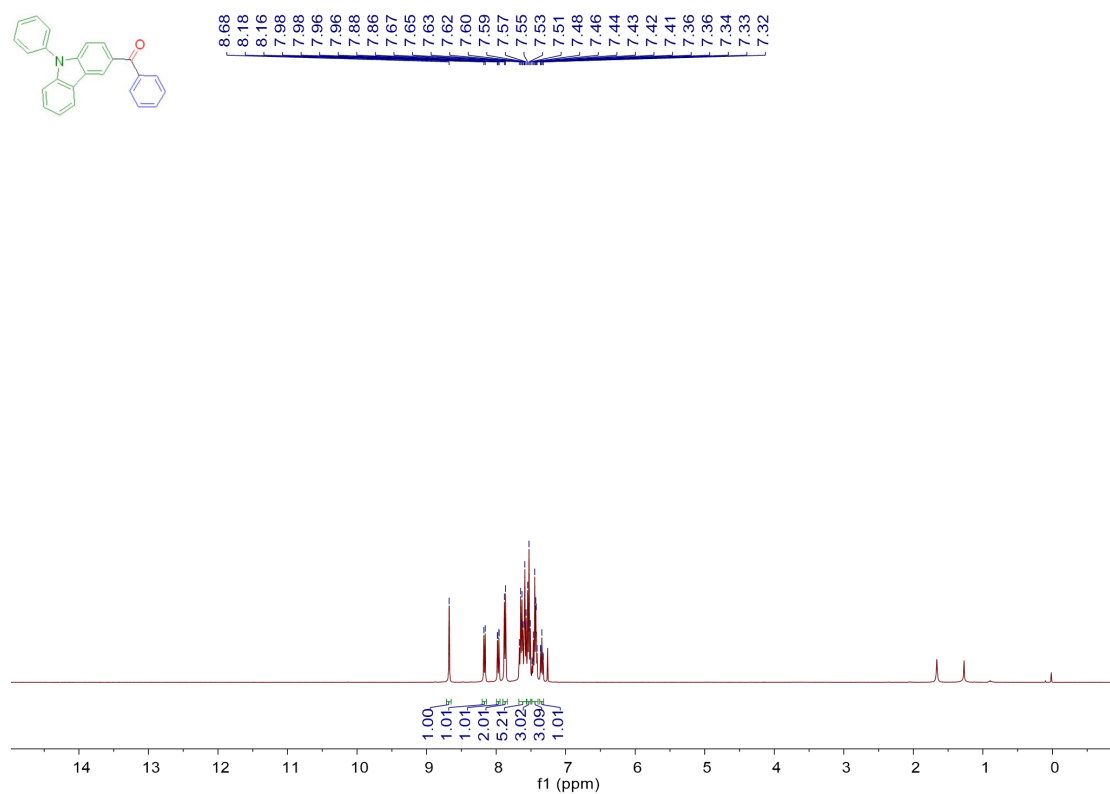

<sup>1</sup>H-NMR (400 MHz, CDCl<sub>3</sub>) of **4z**

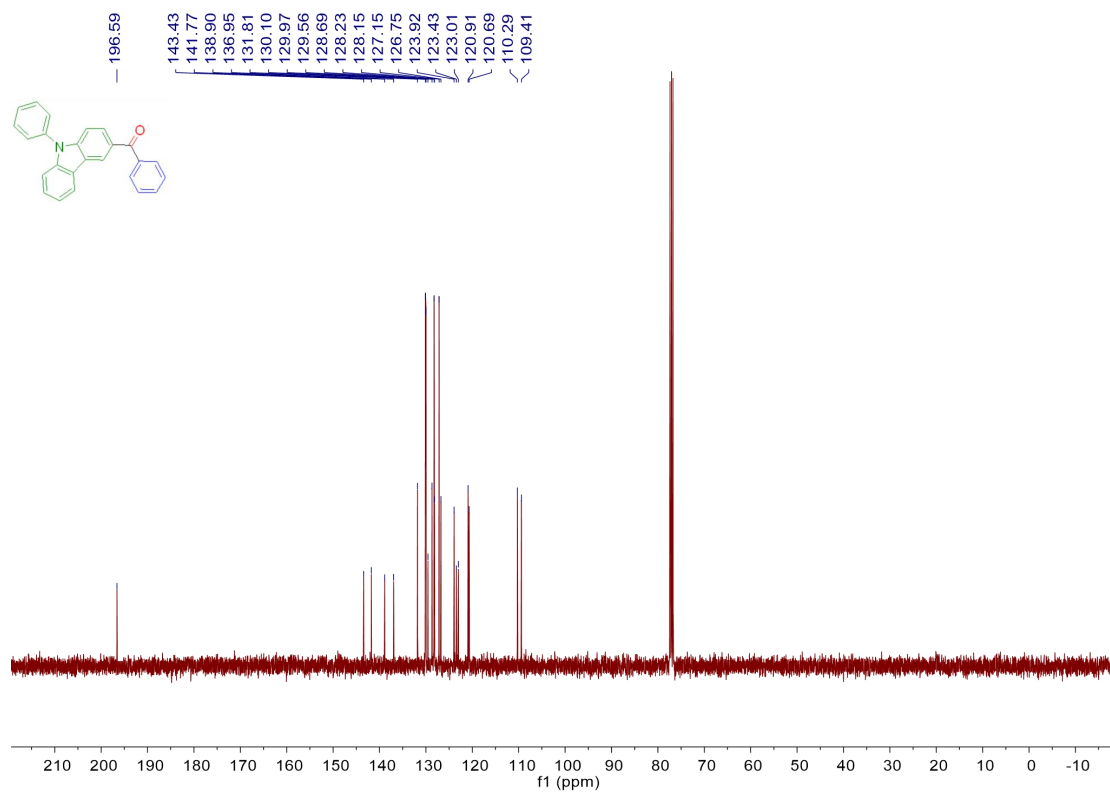

<sup>13</sup>C {<sup>1</sup>H} NMR (100 MHz, CDCl<sub>3</sub>) of **4z**

(9-phenyl-9H-carbazole-3,6-diyl)bis(phenylmethanone) (**4aa**)

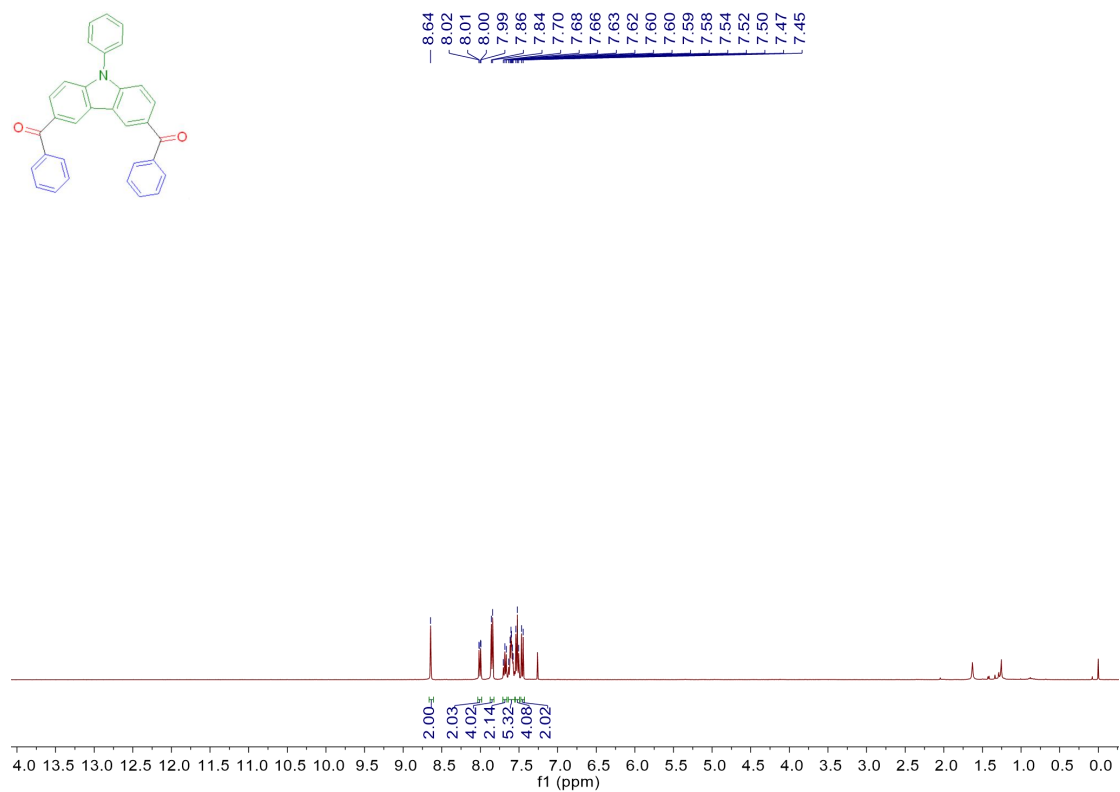

<sup>1</sup>H-NMR (400 MHz, CDCl<sub>3</sub>) of **4aa**

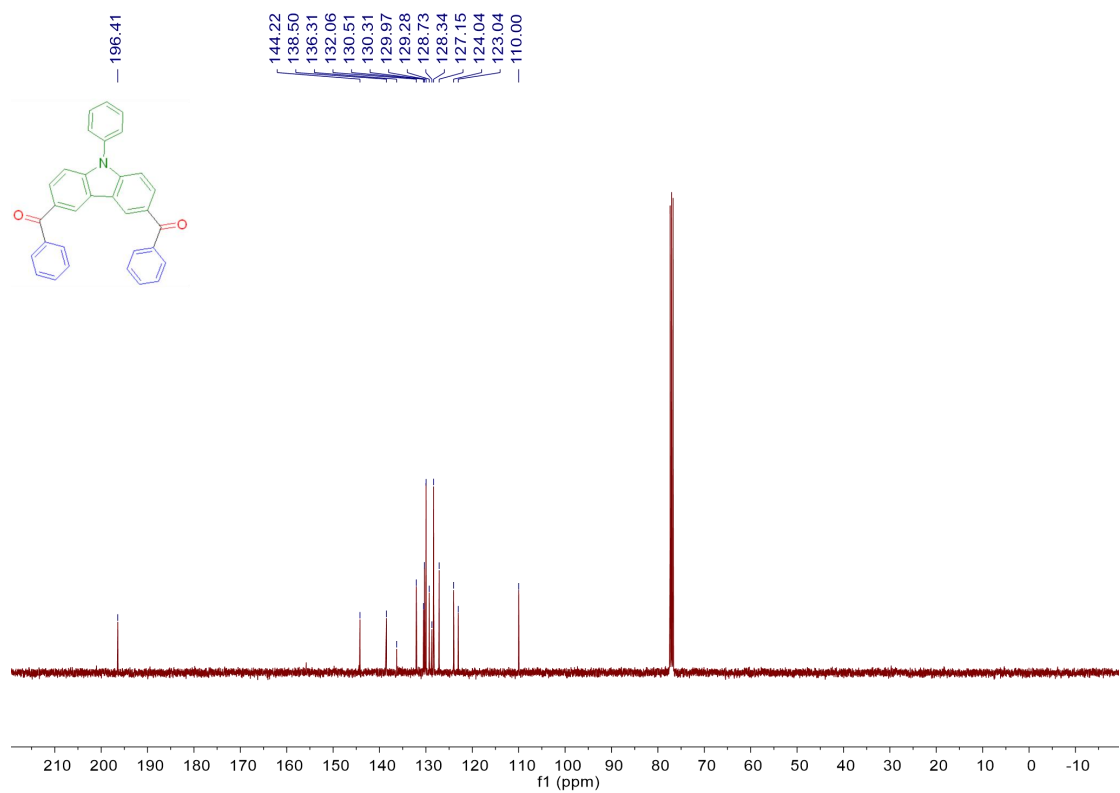

<sup>13</sup>C {<sup>1</sup>H} NMR (100 MHz, CDCl<sub>3</sub>) of **4aa**

dibenzo[b,d]thiophene-2,8-diylbis(phenylmethanone) (**4ab**).

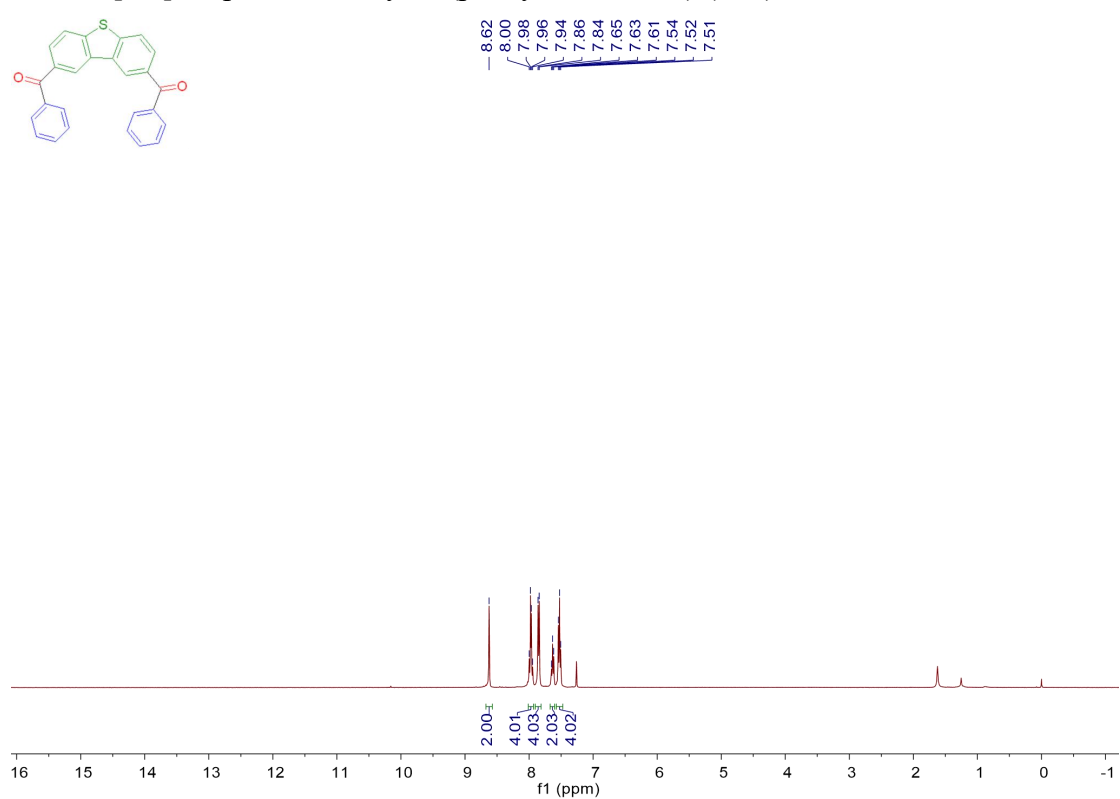

<sup>1</sup>H-NMR (400 MHz, CDCl<sub>3</sub>) of **4ab**

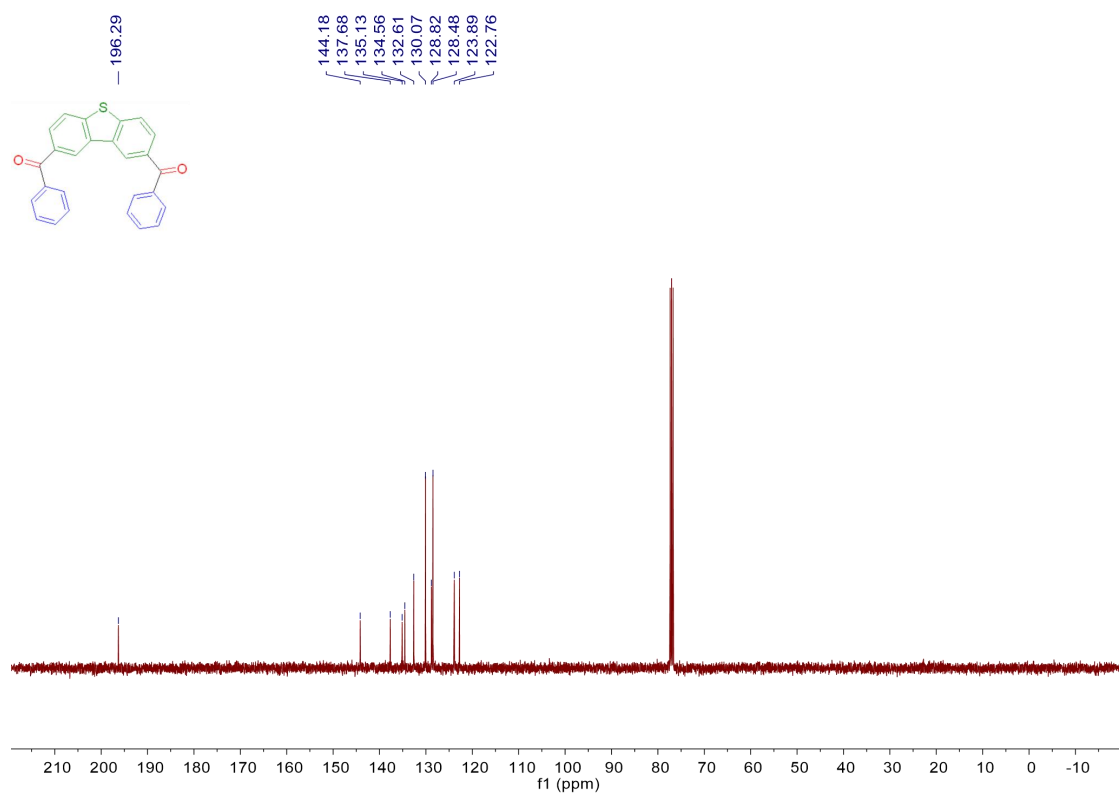

<sup>13</sup>C {<sup>1</sup>H} NMR (100 MHz, CDCl<sub>3</sub>) of **4ab**

### 1,3,5-Tris(4-benzoylphenyl)benzene (**4ac**)

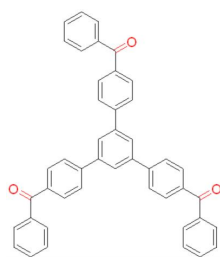

7.97  
7.95  
7.94  
7.87  
7.85  
7.83  
7.64  
7.63  
7.61  
7.54  
7.52  
7.50

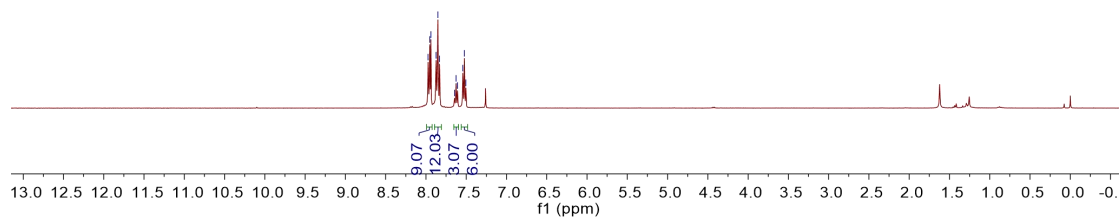

### <sup>1</sup>H-NMR (400 MHz, CDCl<sub>3</sub>) of **4ac**

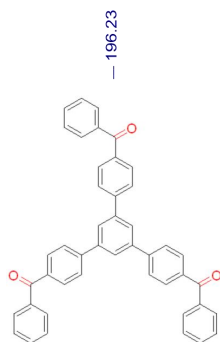

196.23  
144.54  
141.71  
137.60  
136.85  
132.56  
130.88  
130.06  
128.38  
127.25  
126.15

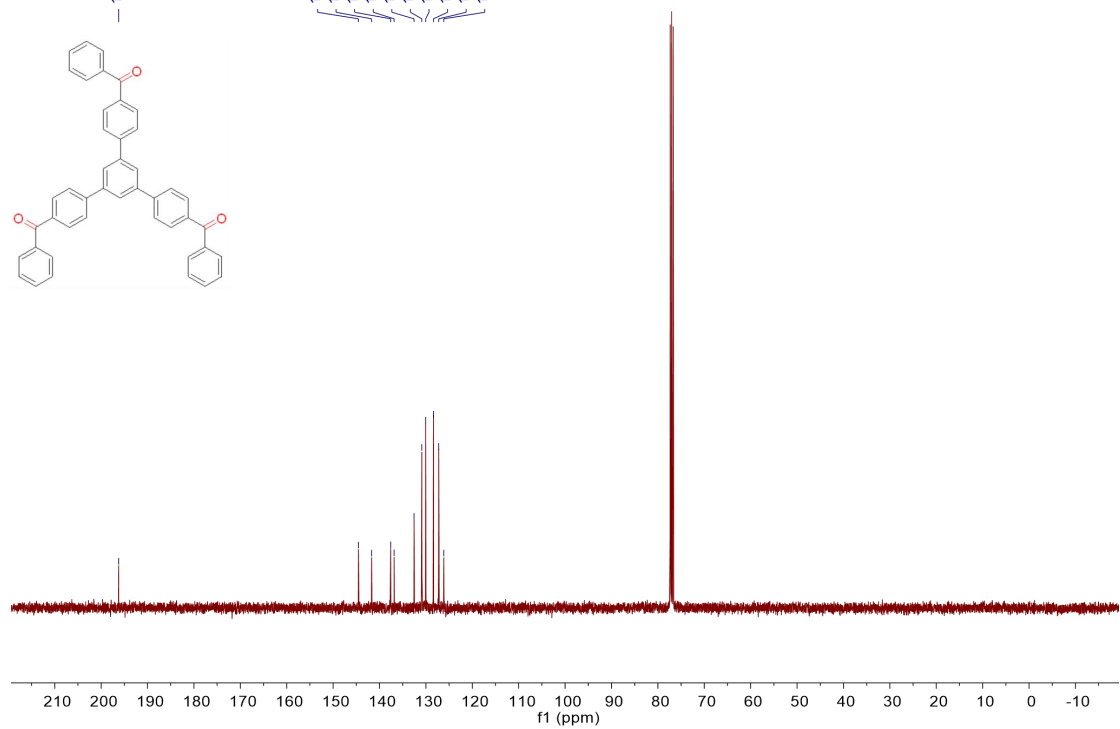

### <sup>13</sup>C {<sup>1</sup>H} NMR (100 MHz, CDCl<sub>3</sub>) of **4ac**

(4-nitrophenyl)(phenyl)methanone (**4ad**)

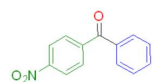

8.33  
8.31  
7.93  
7.91  
7.79  
7.78  
7.66  
7.64  
7.63  
7.53  
7.51

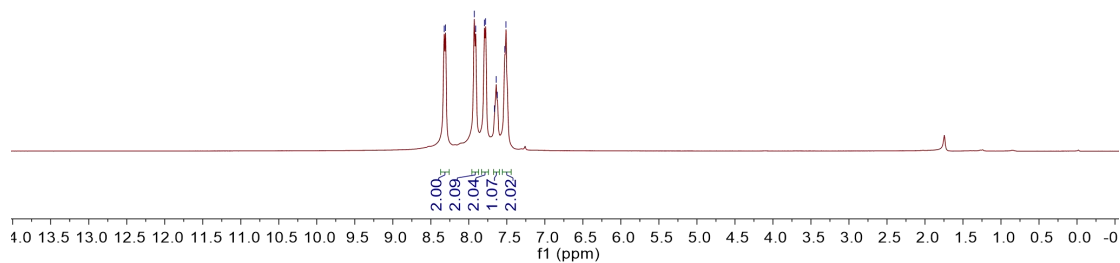

<sup>1</sup>H-NMR (400 MHz, CDCl<sub>3</sub>) of **4ad**

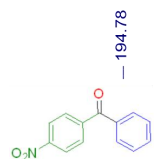

149.85  
142.91  
136.32  
133.49  
130.71  
130.12  
128.71  
123.56

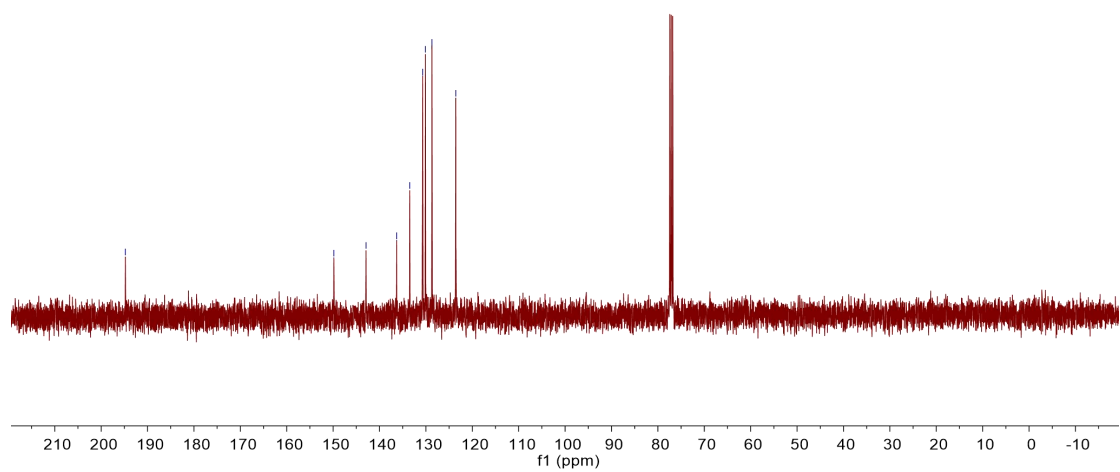

<sup>13</sup>C {<sup>1</sup>H} NMR (100 MHz, CDCl<sub>3</sub>) of **4ad**

# 1-(4-(4-methoxybenzoyl)phenyl)ethan-1-one (**4ae**)

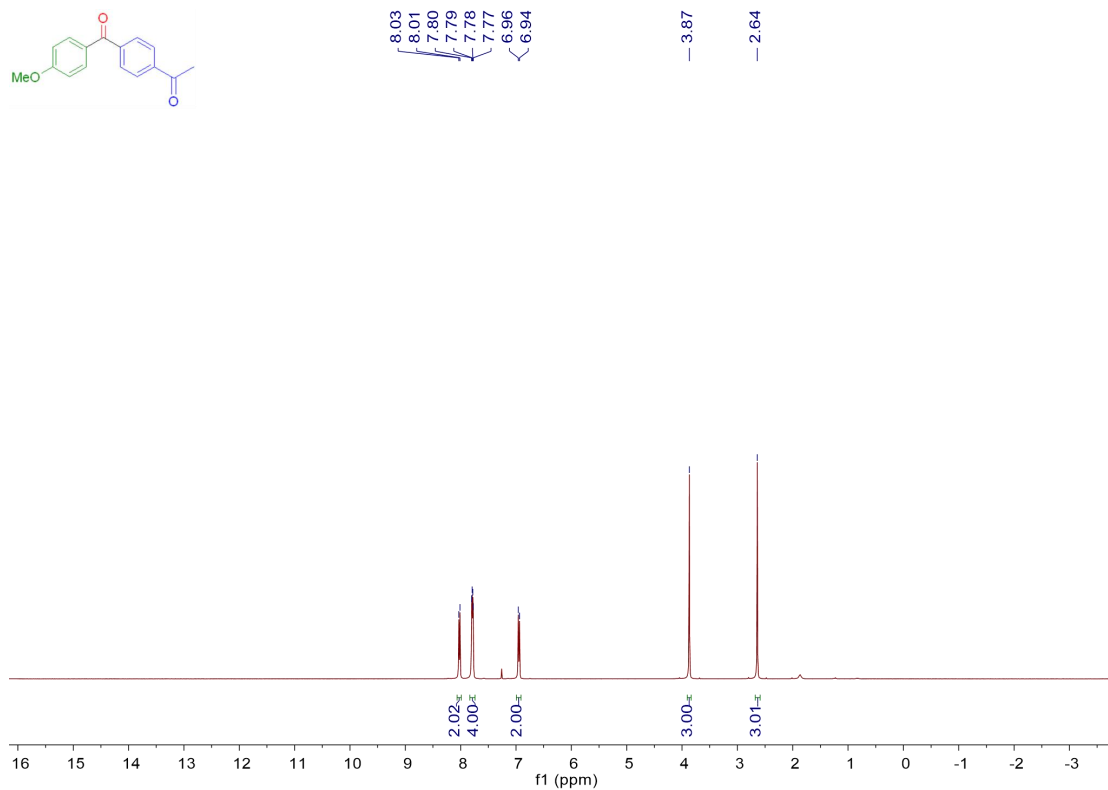

## <sup>1</sup>H-NMR (400 MHz, CDCl<sub>3</sub>) of **4ae**

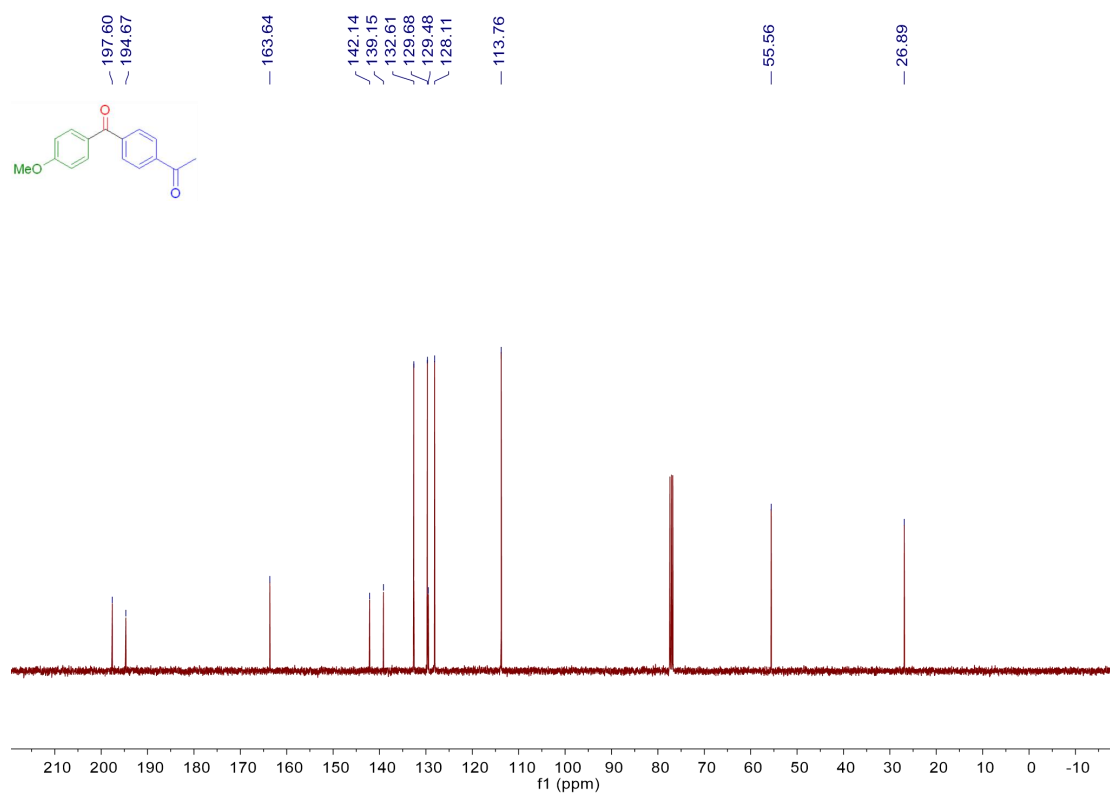

## <sup>13</sup>C {<sup>1</sup>H} NMR (100 MHz, CDCl<sub>3</sub>) of **4ae**

(4-fluorophenyl)(4-methoxyphenyl)methanone (**4af**).

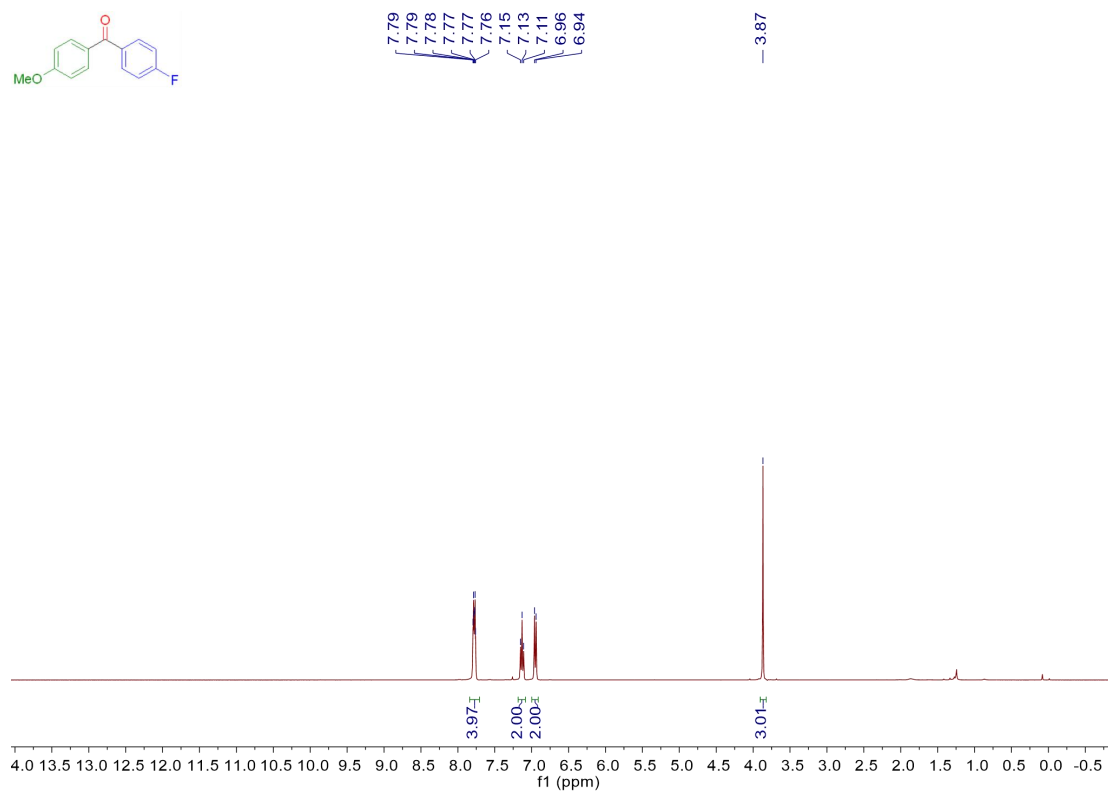

<sup>1</sup>H-NMR (400 MHz, CDCl<sub>3</sub>) of **4af**

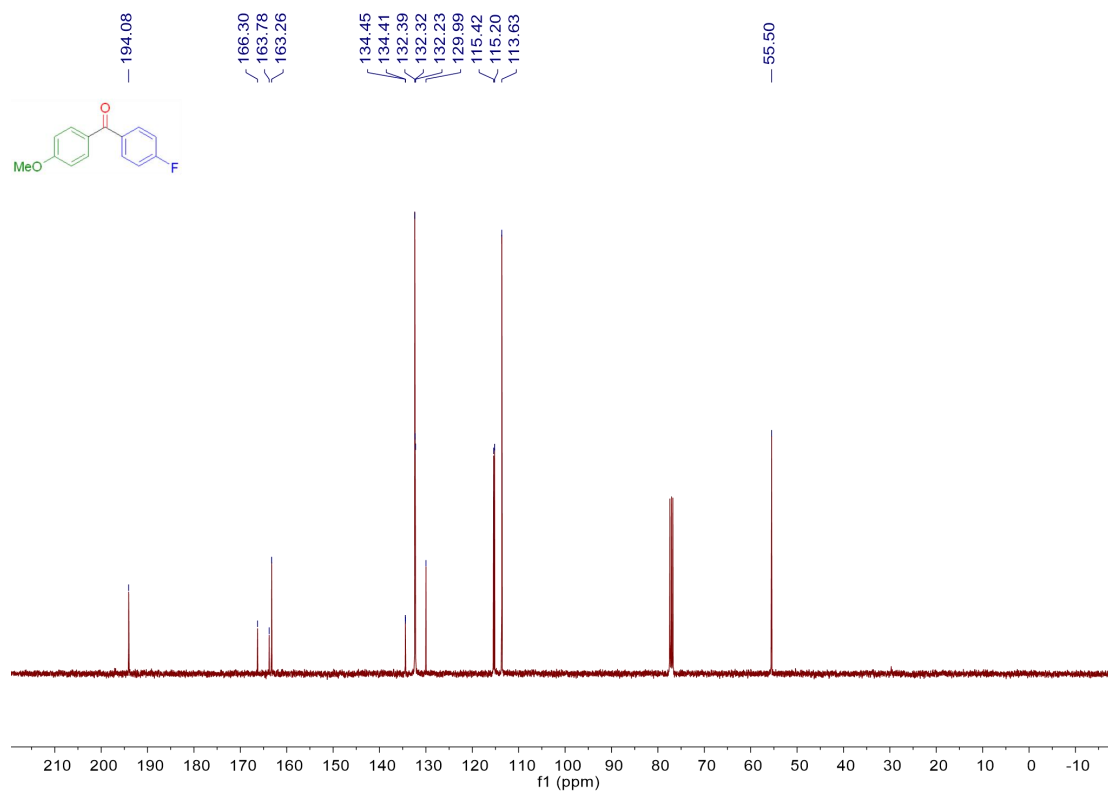

<sup>13</sup>C {<sup>1</sup>H} NMR (100 MHz, CDCl<sub>3</sub>) of **4af**



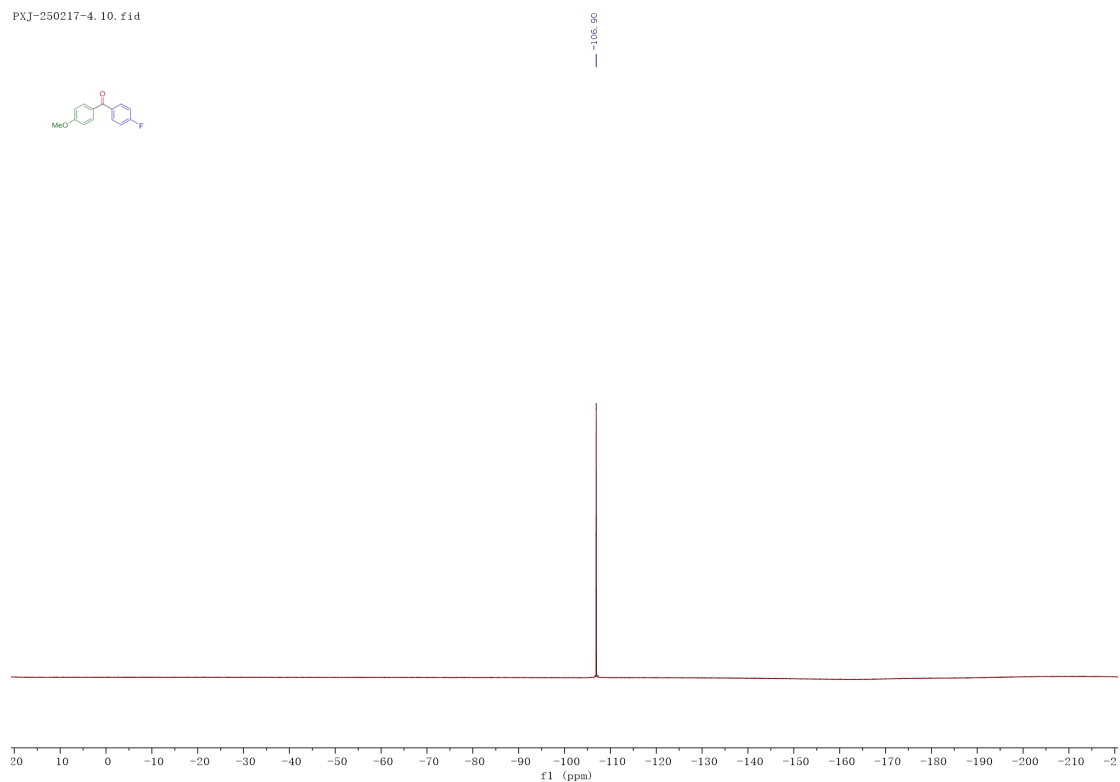4-(4-methoxybenzoyl)benzonitrile (**4ag**)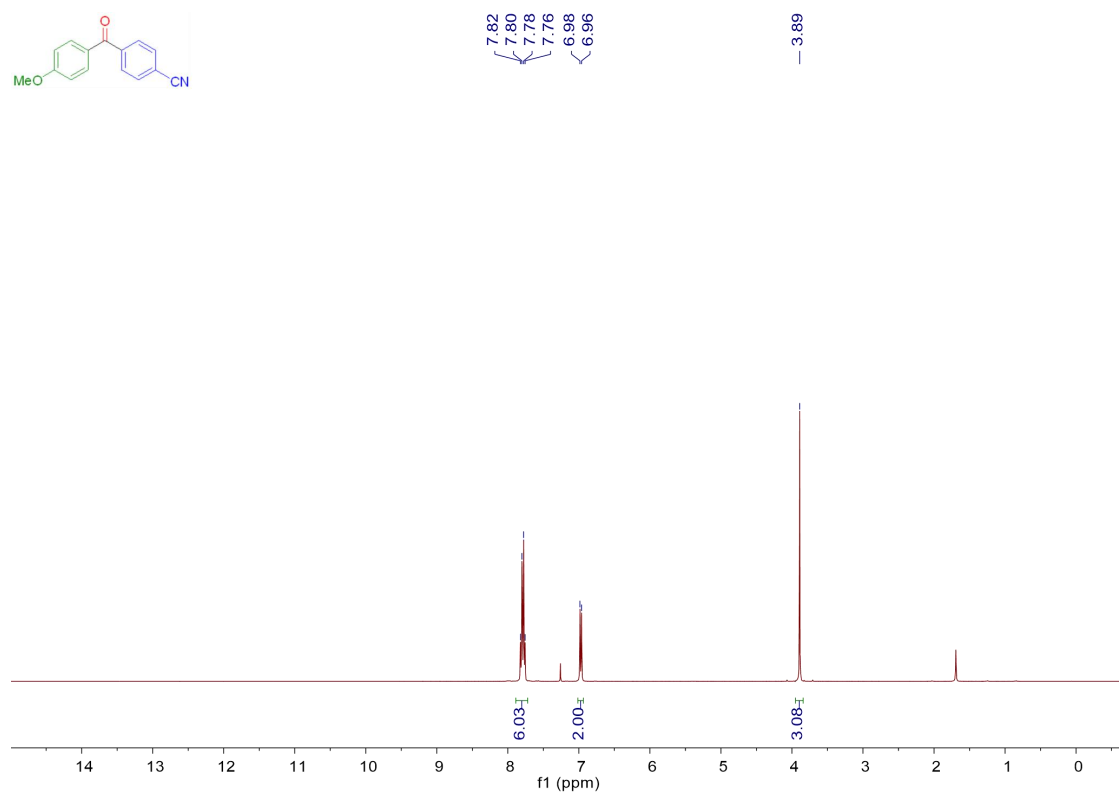

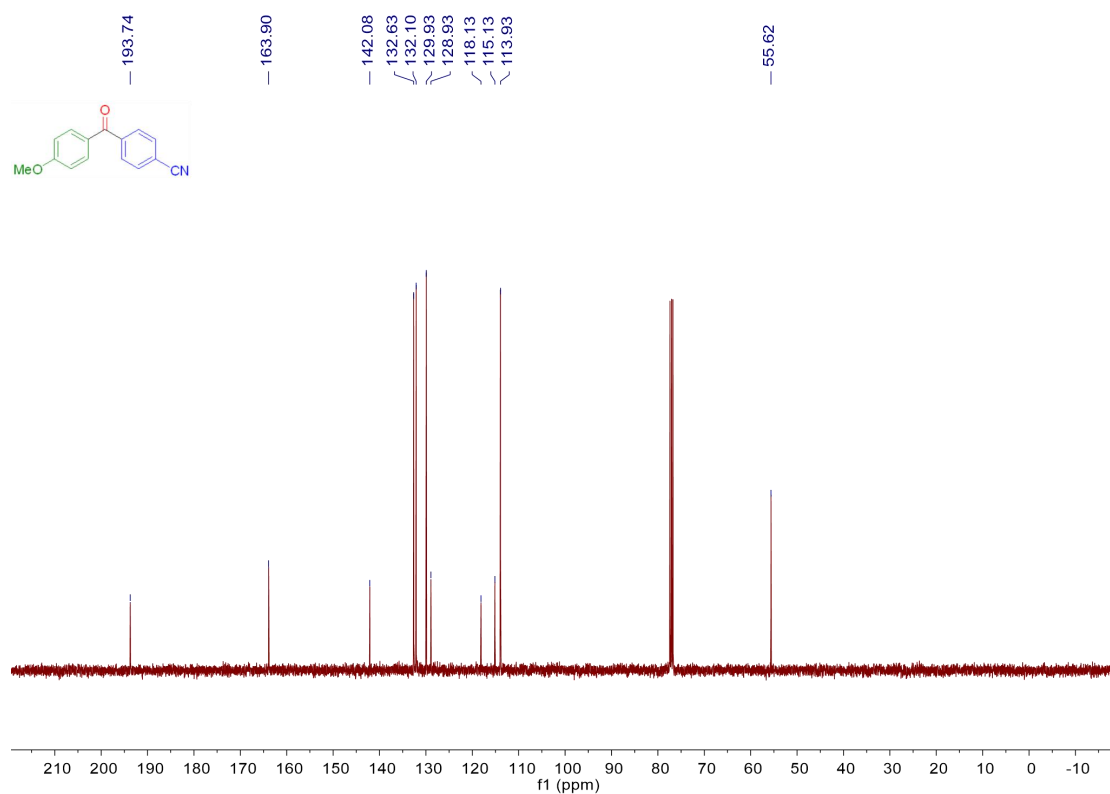

$^{13}\text{C}$  { $^1\text{H}$ } NMR (100 MHz,  $\text{CDCl}_3$ ) of **4ag**

(4-methoxyphenyl)(p-tolyl)methanone (**4ah**)

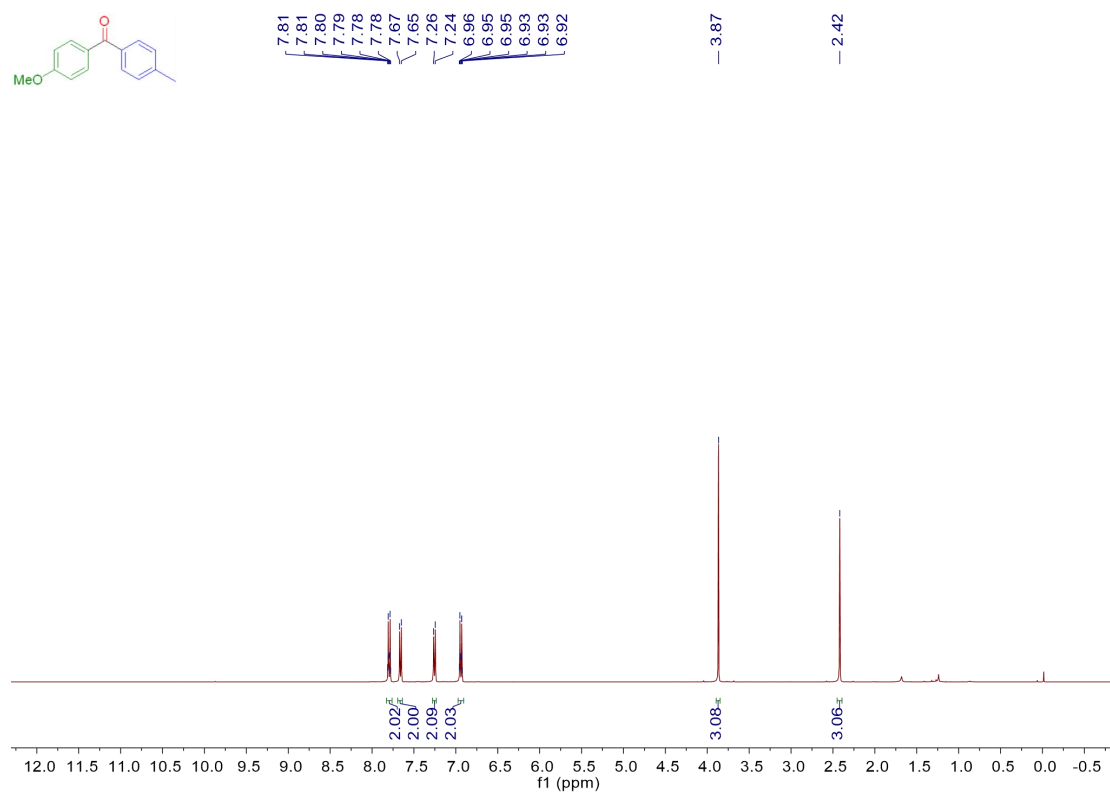

$^1\text{H}$ -NMR (400 MHz,  $\text{CDCl}_3$ ) of **4ah**

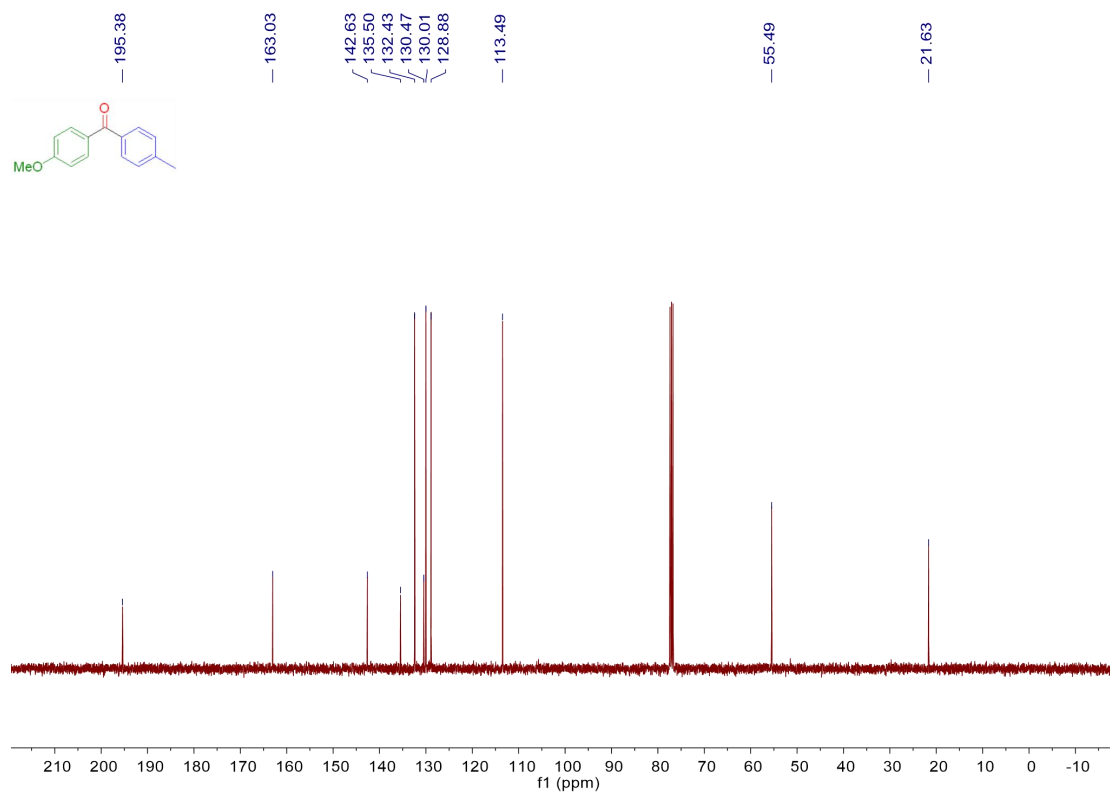

$^{13}\text{C}$  { $^1\text{H}$ } NMR (100 MHz,  $\text{CDCl}_3$ ) of **4ah**

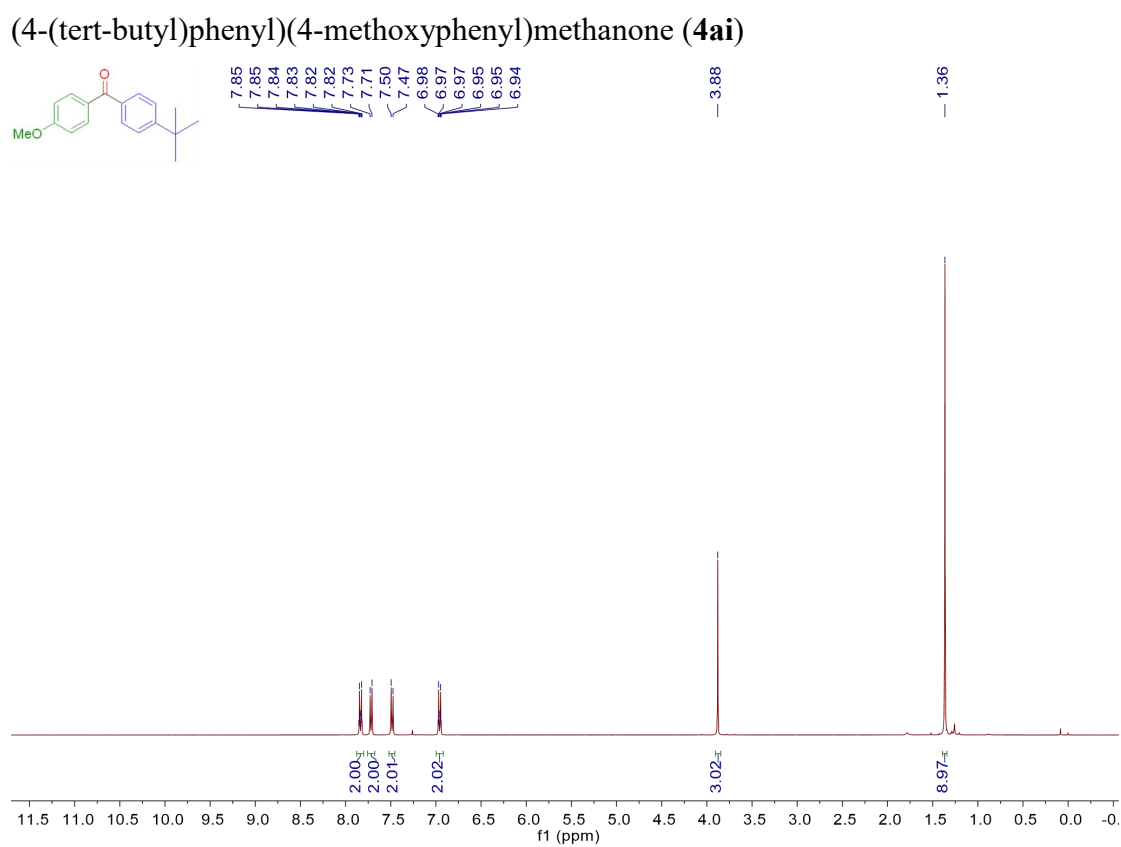

$^1\text{H}$ -NMR (400 MHz,  $\text{CDCl}_3$ ) of **4ai**

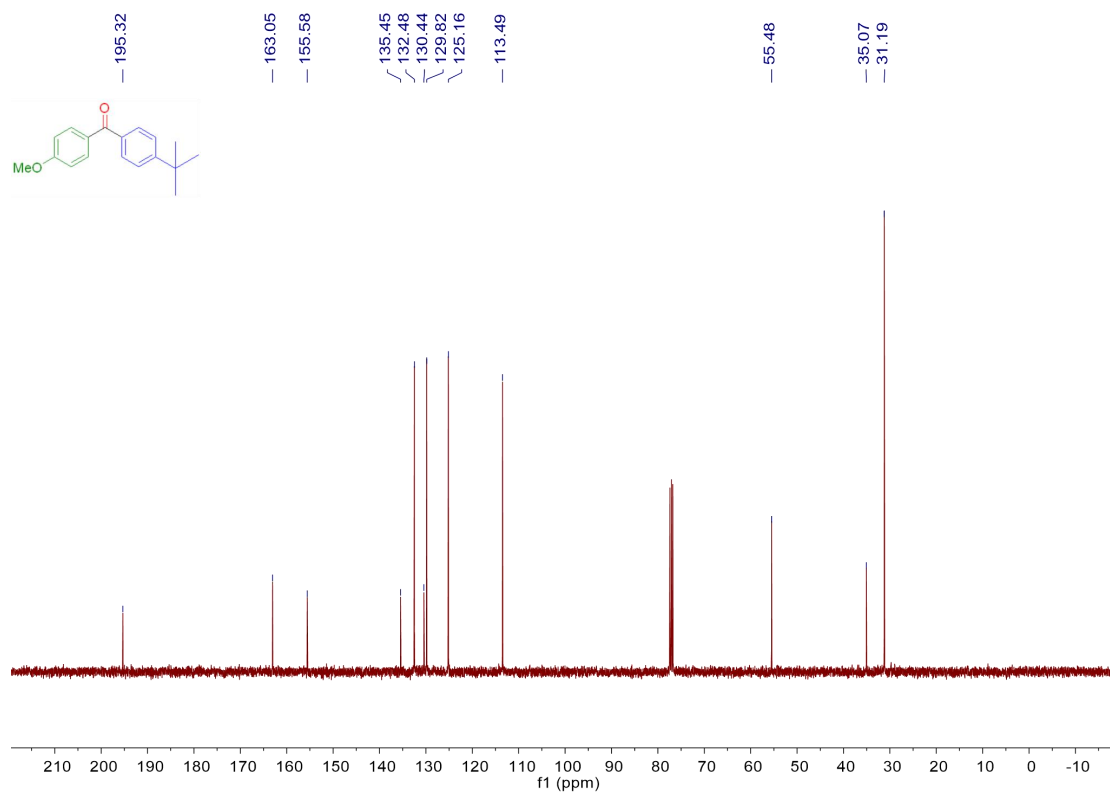

$^{13}\text{C}$  { $^1\text{H}$ } NMR (100 MHz,  $\text{CDCl}_3$ ) of **4ai**

(4-methoxyphenyl)(o-tolyl)methanone (**4aj**)

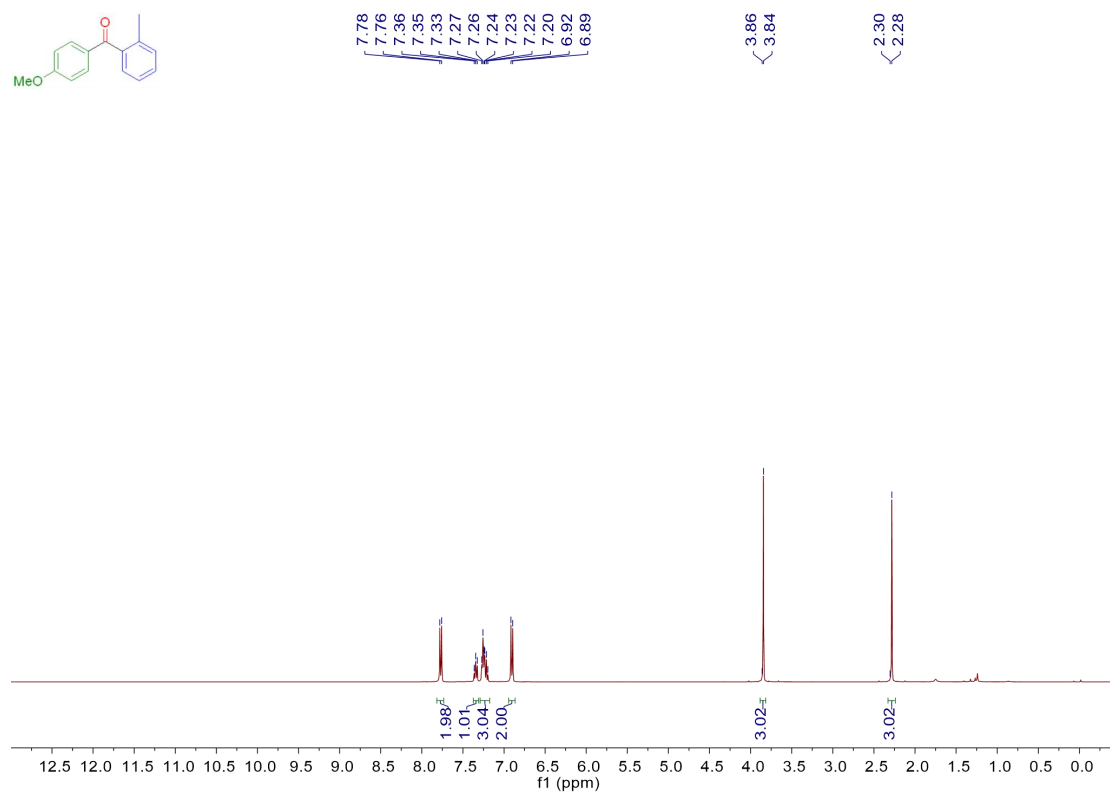

$^1\text{H}$ -NMR (400 MHz,  $\text{CDCl}_3$ ) of **4aj**

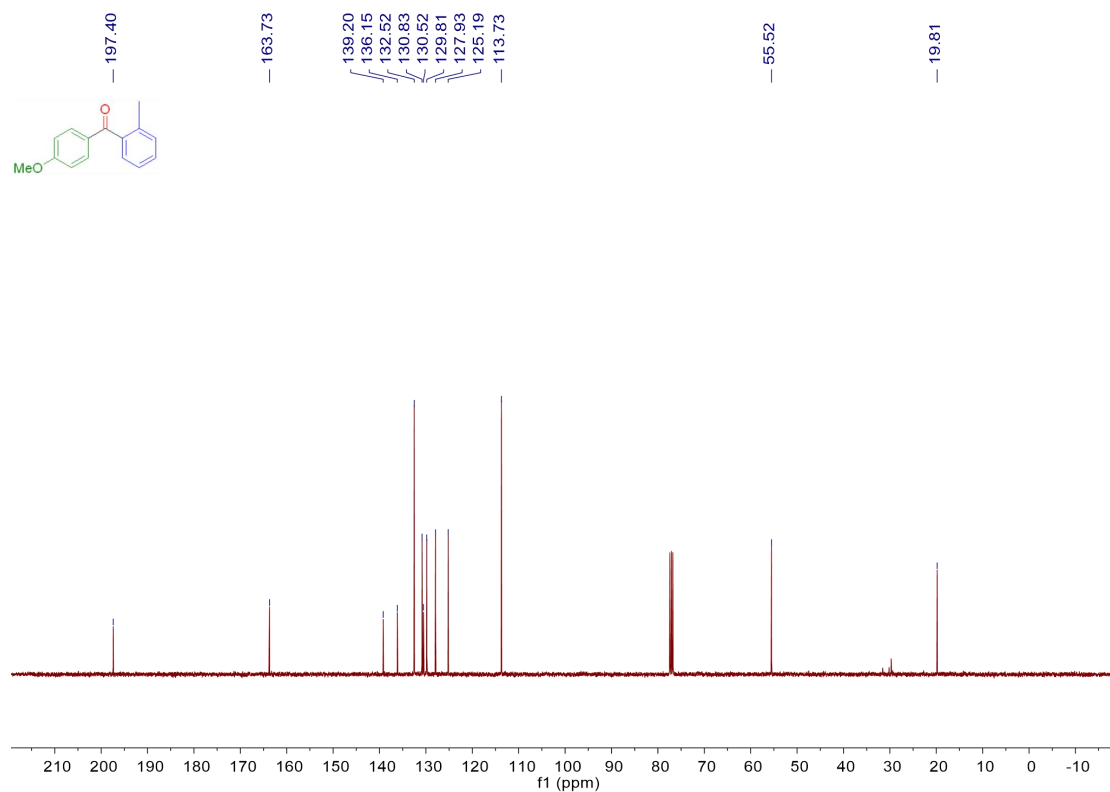

$^{13}\text{C}$   $\{^1\text{H}\}$  NMR (100 MHz,  $\text{CDCl}_3$ ) of **4aj**

(2,6-dimethoxyphenyl)(4-methoxyphenyl)methanone (**4ak**)

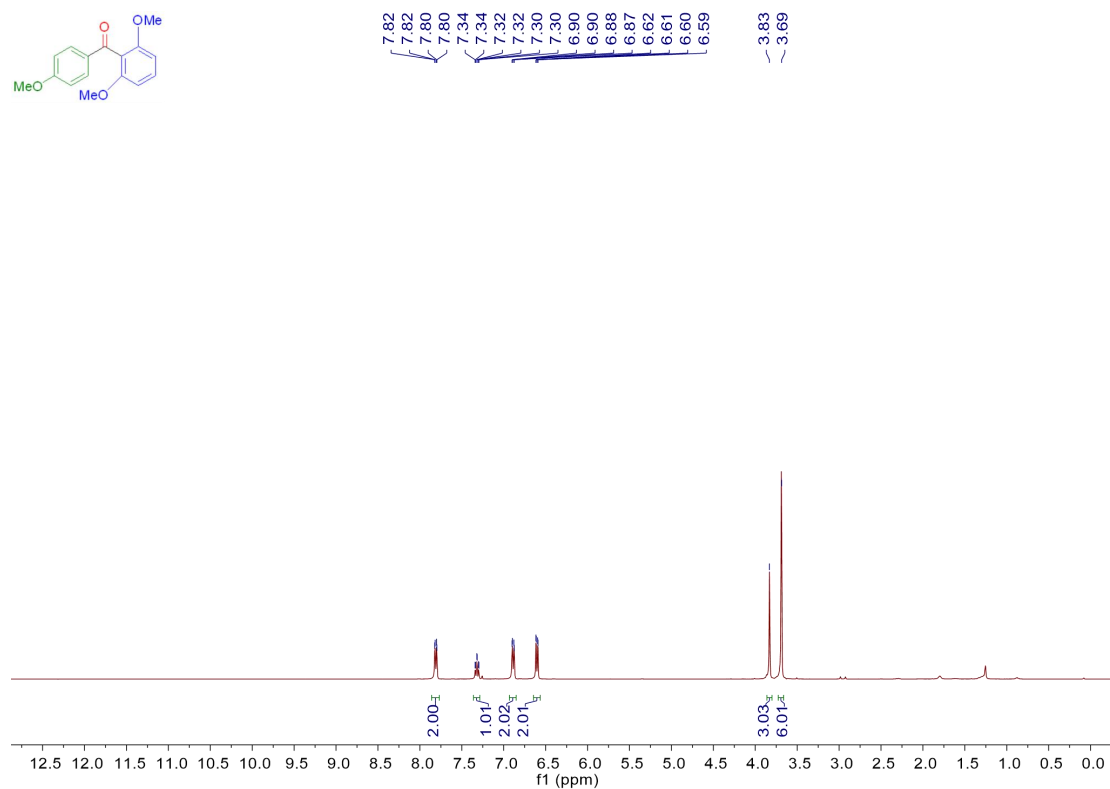

$^1\text{H}$ -NMR (400 MHz,  $\text{CDCl}_3$ ) of **4ak**

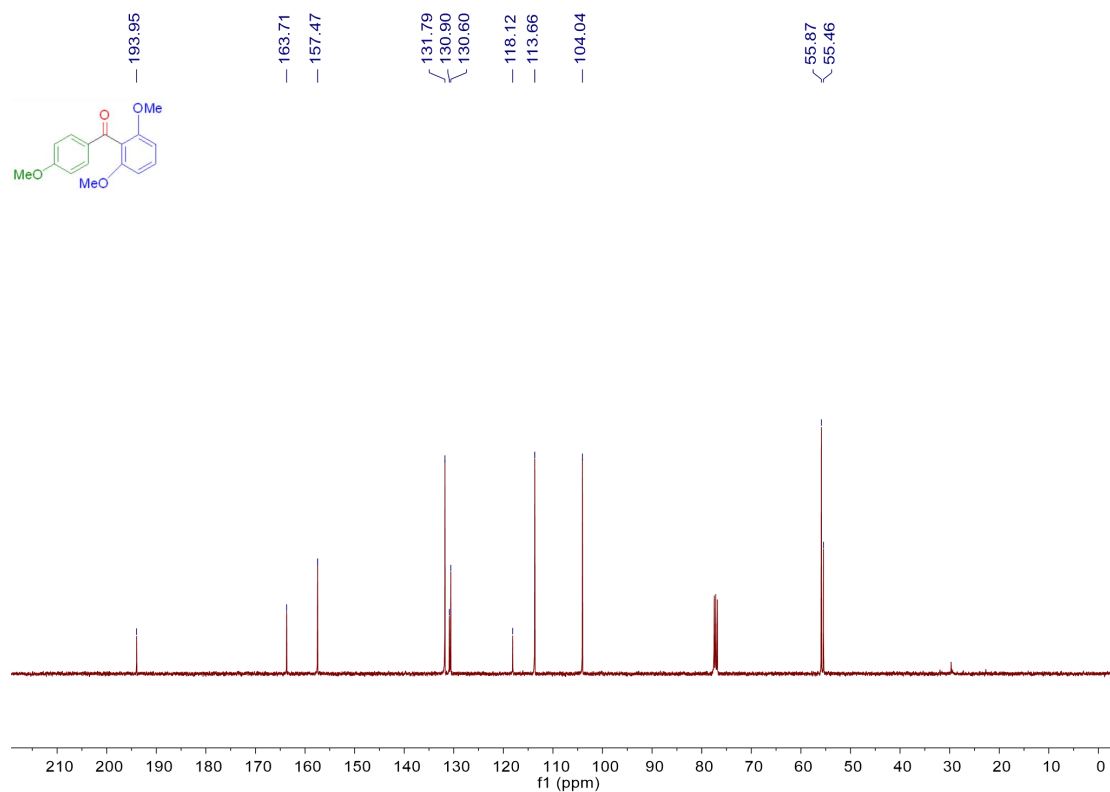

$^{13}\text{C}$   $\{^1\text{H}\}$  NMR (100 MHz,  $\text{CDCl}_3$ ) of **4ak**

(3,4-dichlorophenyl)(4-methoxyphenyl)methanone (**4al**)

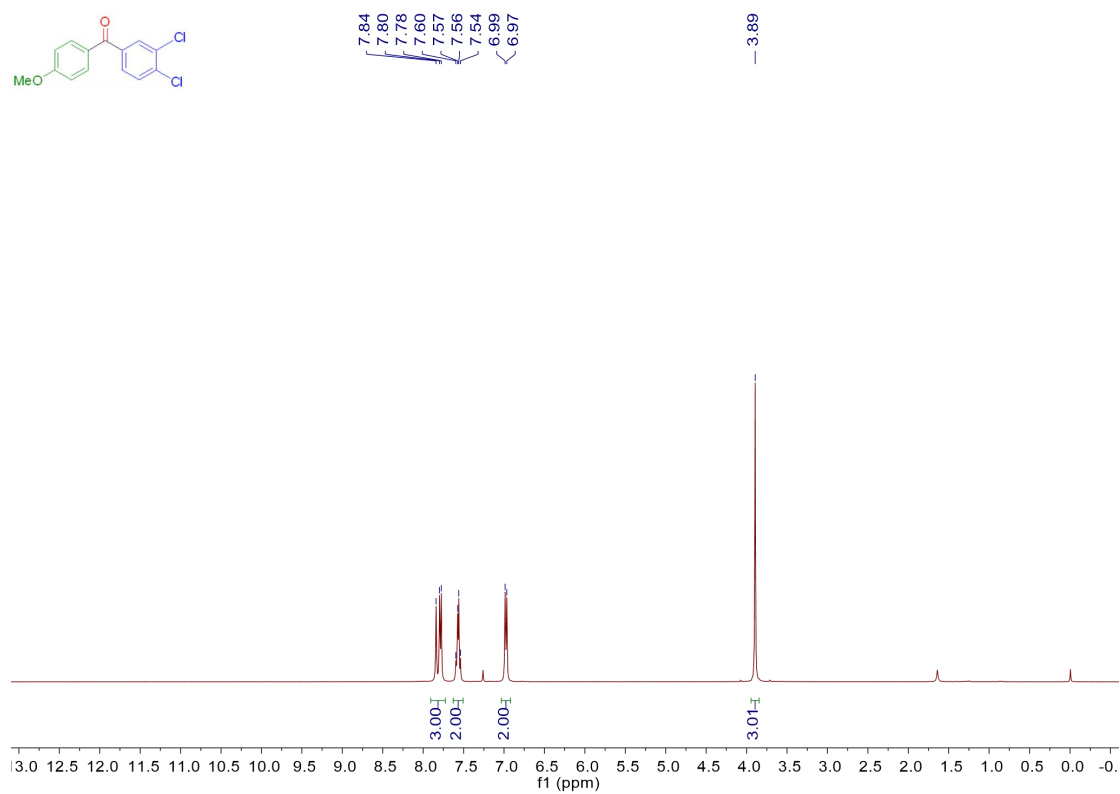

$^1\text{H}$ -NMR (400 MHz,  $\text{CDCl}_3$ ) of **4al**

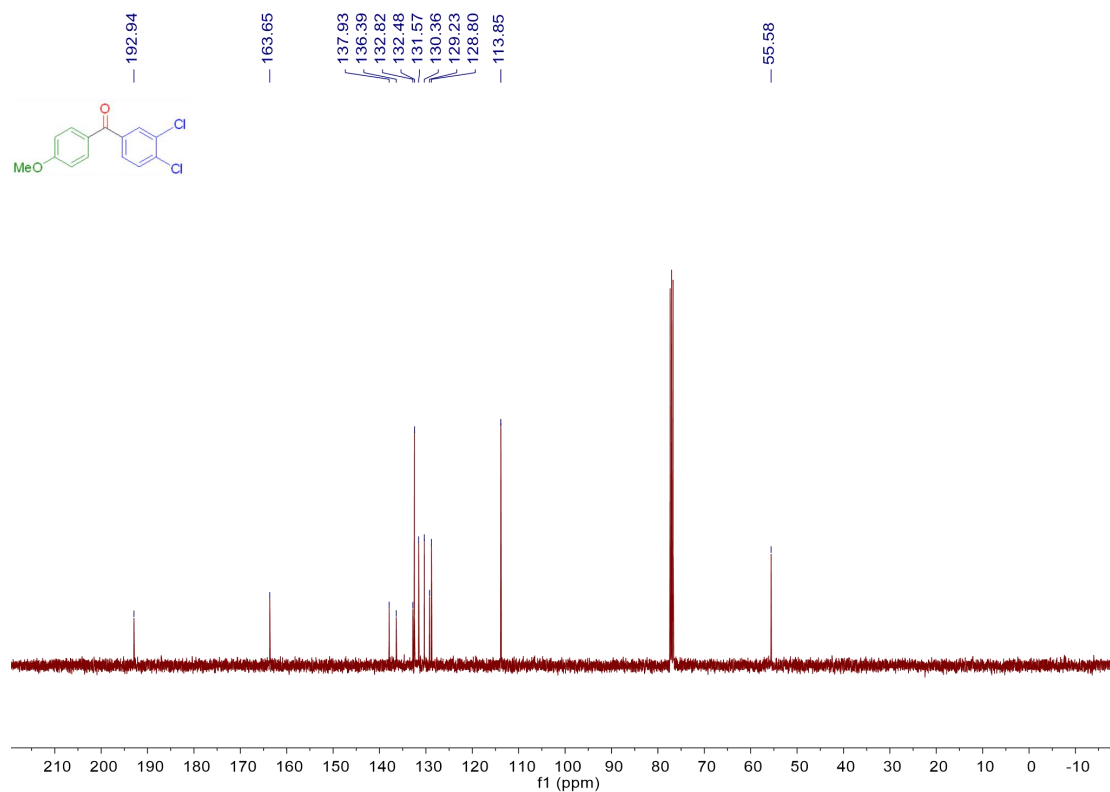

$^{13}\text{C}$   $\{^1\text{H}\}$  NMR (100 MHz,  $\text{CDCl}_3$ ) of **4al**

(4-methoxyphenyl)(3,4,5-trifluorophenyl)methanone (**4am**)

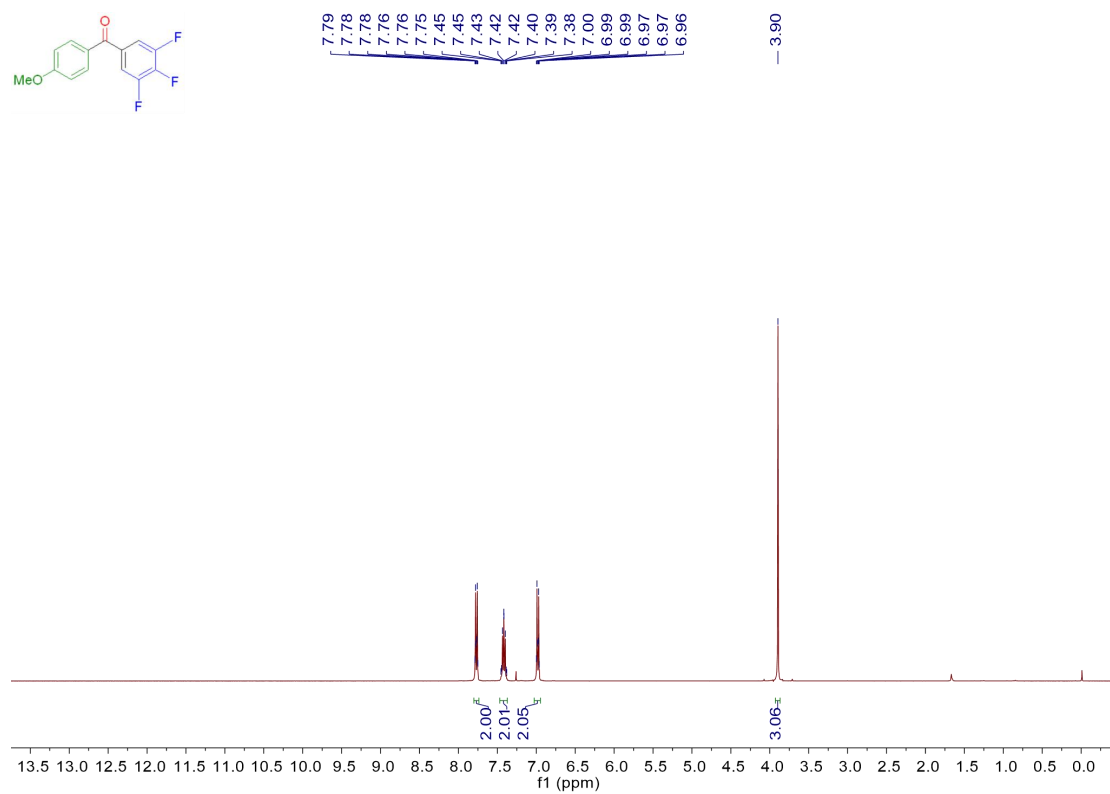

$^1\text{H}$ -NMR (400 MHz,  $\text{CDCl}_3$ ) of **4am**

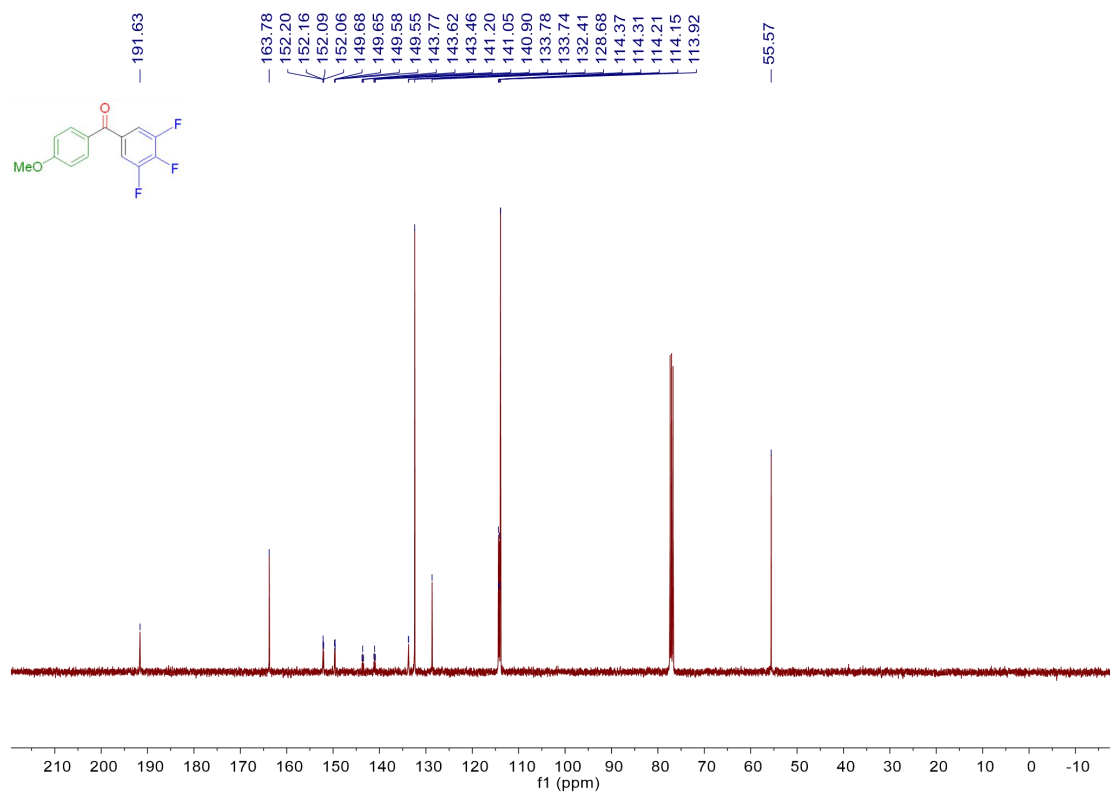

$^{13}\text{C}$  { $^1\text{H}$ } NMR (100 MHz,  $\text{CDCl}_3$ ) of **4am**

PXJ-250217-3.10.fid

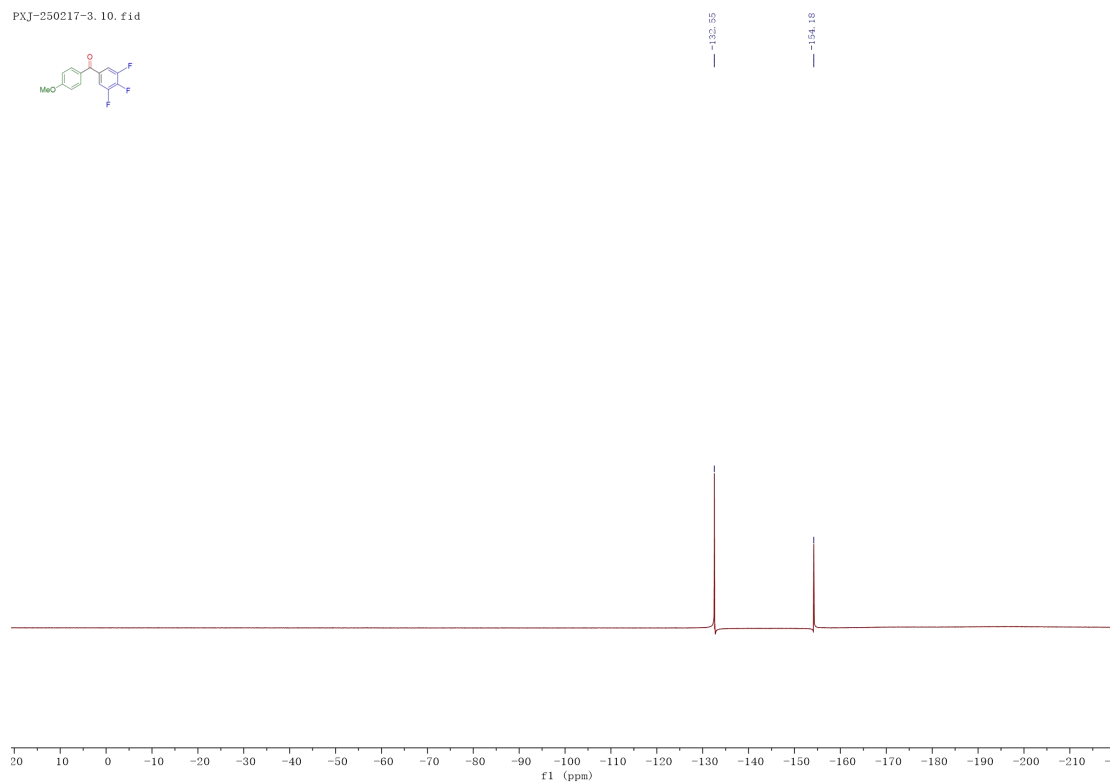

$^{19}\text{F}$  NMR (377 MHz,  $\text{CDCl}_3$ ) of **4am**



(4-methoxyphenyl)(naphthalen-1-yl)methanone (**4an**)

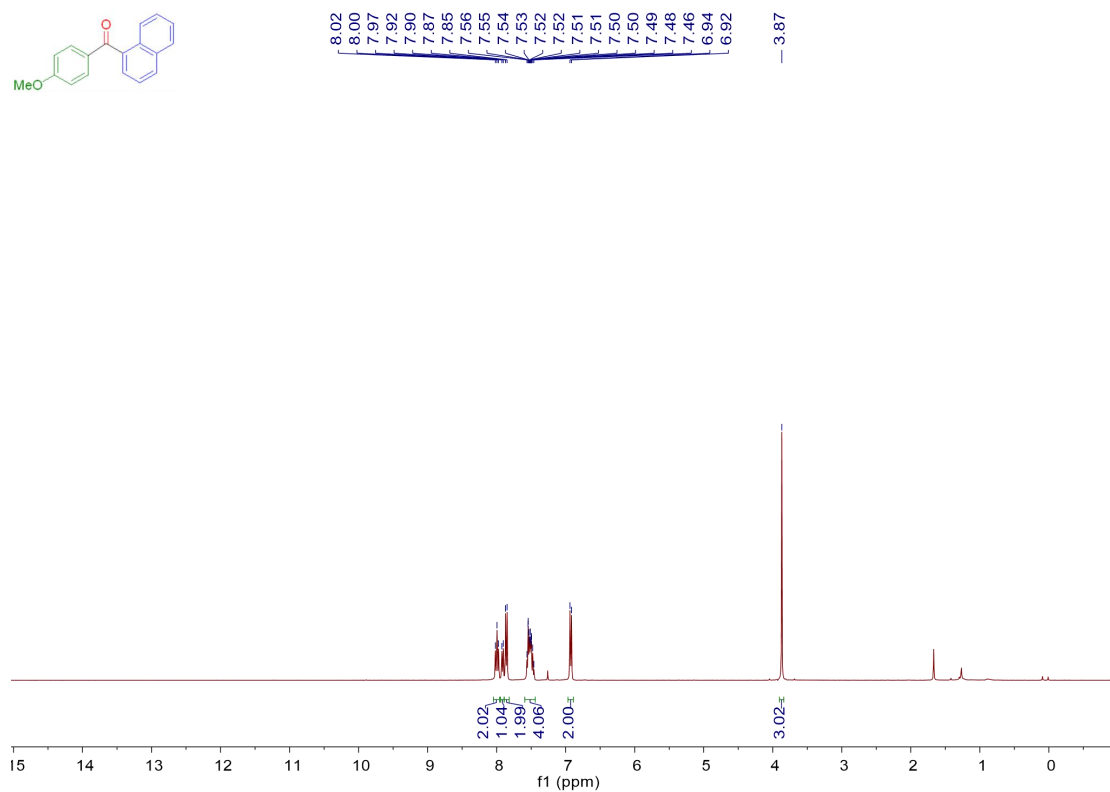

<sup>1</sup>H-NMR (400 MHz, CDCl<sub>3</sub>) of **4an**

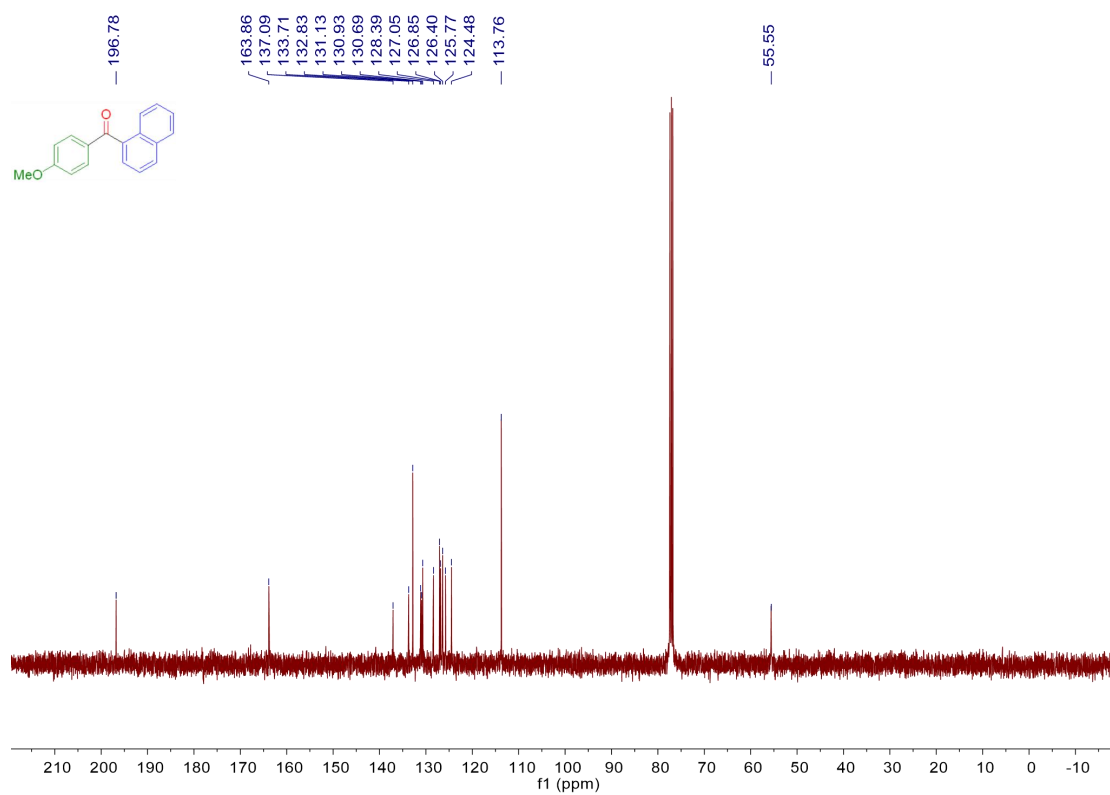

<sup>13</sup>C {<sup>1</sup>H} NMR (100 MHz, CDCl<sub>3</sub>) of **4an**

anthracen-9-yl(4-methoxyphenyl)methanone (**4ao**)

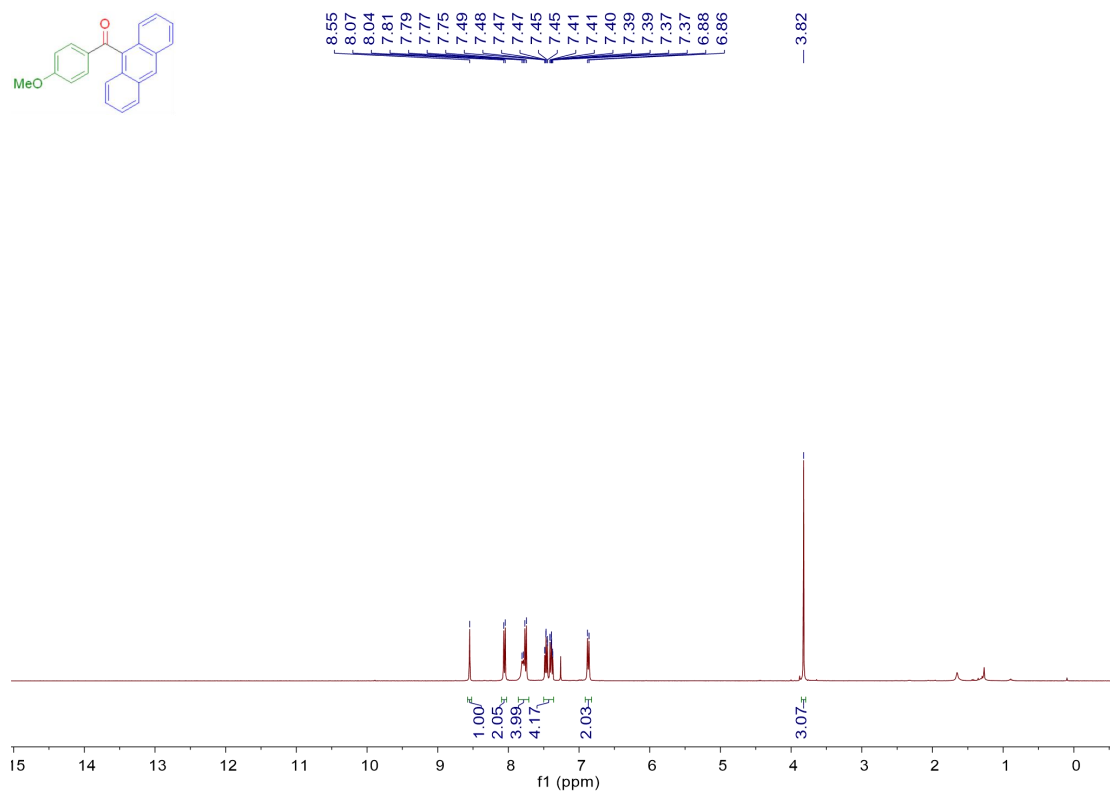

<sup>1</sup>H-NMR (400 MHz, CDCl<sub>3</sub>) of **4ao**

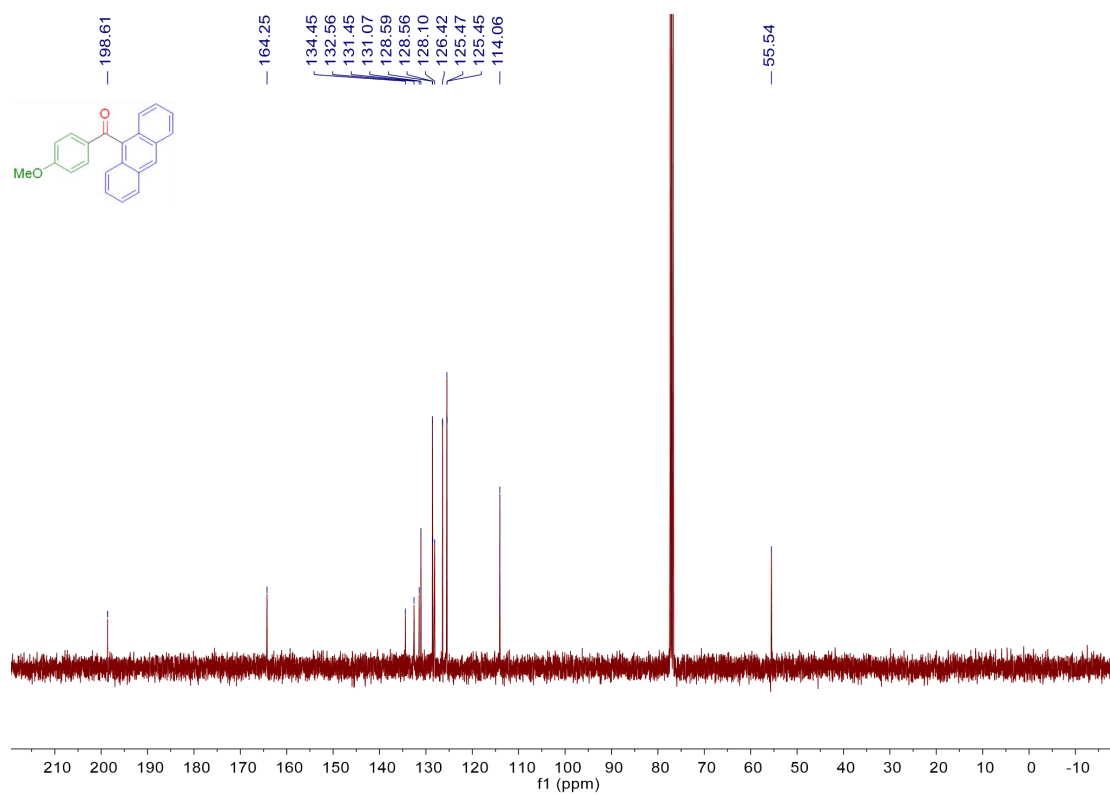

<sup>13</sup>C {<sup>1</sup>H} NMR (100 MHz, CDCl<sub>3</sub>) of **4ao**

benzofuran-5-yl(4-methoxyphenyl)methanone (**4ap**)

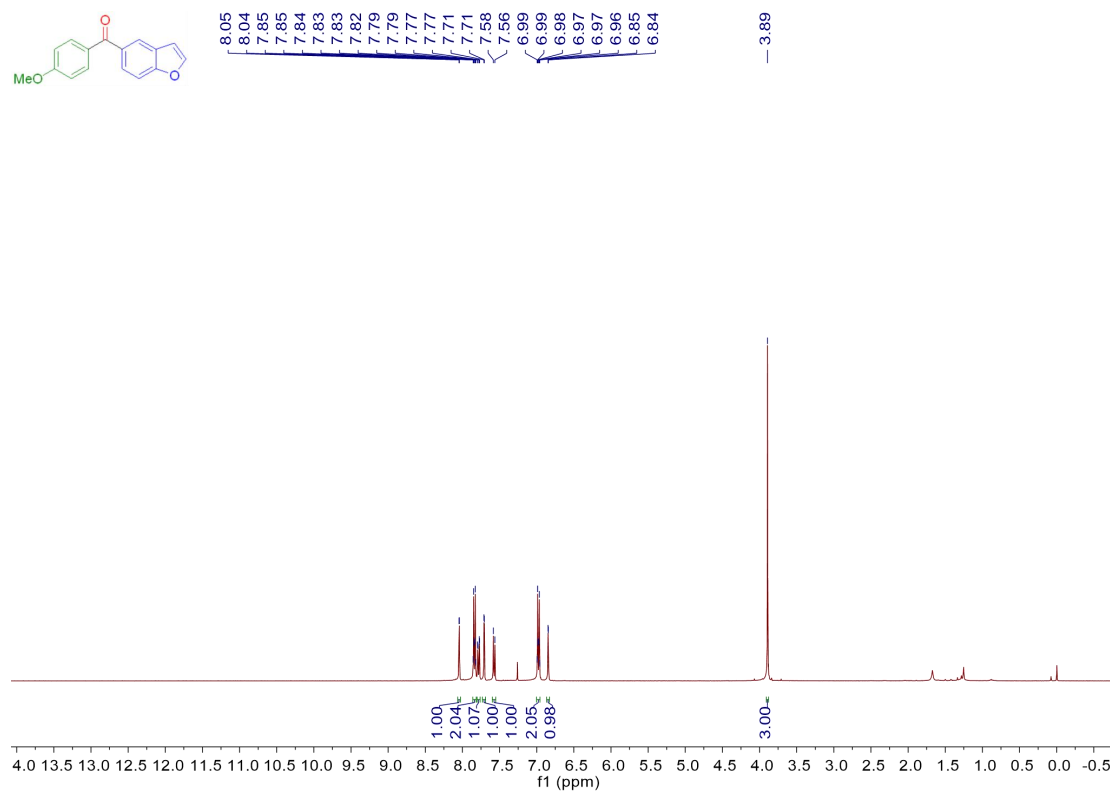

<sup>1</sup>H-NMR (400 MHz, CDCl<sub>3</sub>) of **4ap**

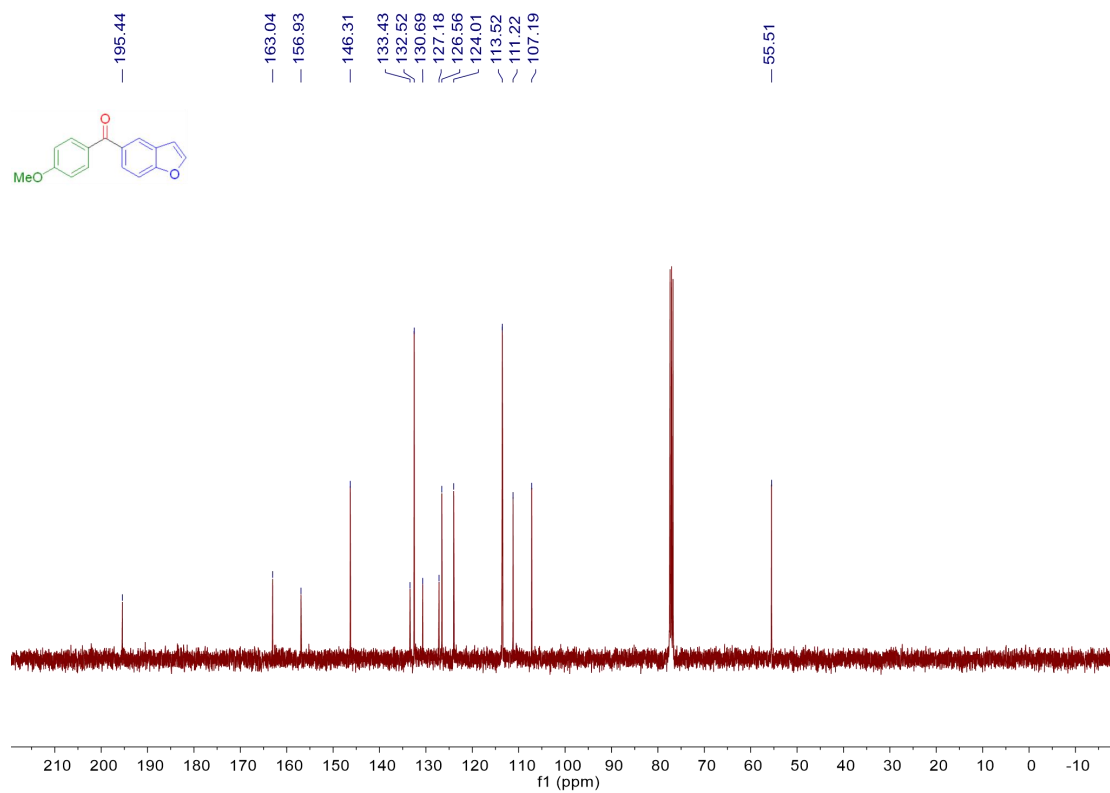

<sup>13</sup>C {<sup>1</sup>H} NMR (100 MHz, CDCl<sub>3</sub>) of **4ap**

benzo[d][1,3]dioxol-5-yl(4-methoxyphenyl)methanone (**4aq**)

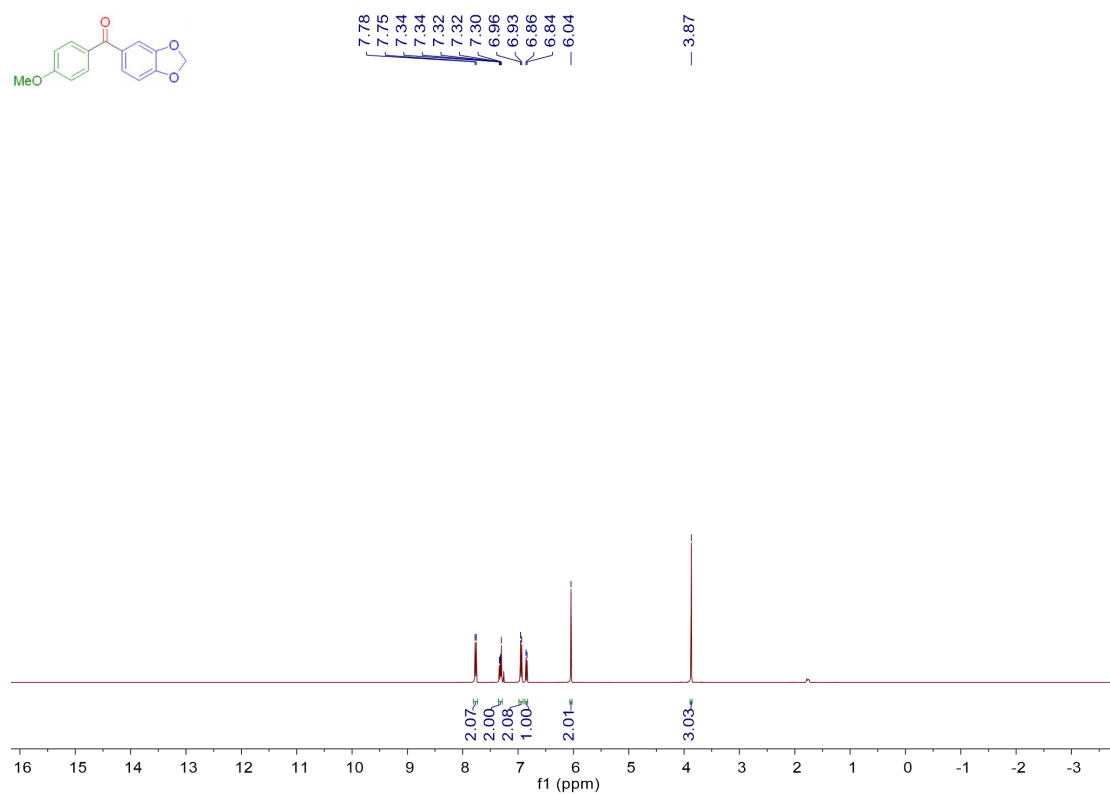

<sup>1</sup>H-NMR (400 MHz, CDCl<sub>3</sub>) of **4aq**

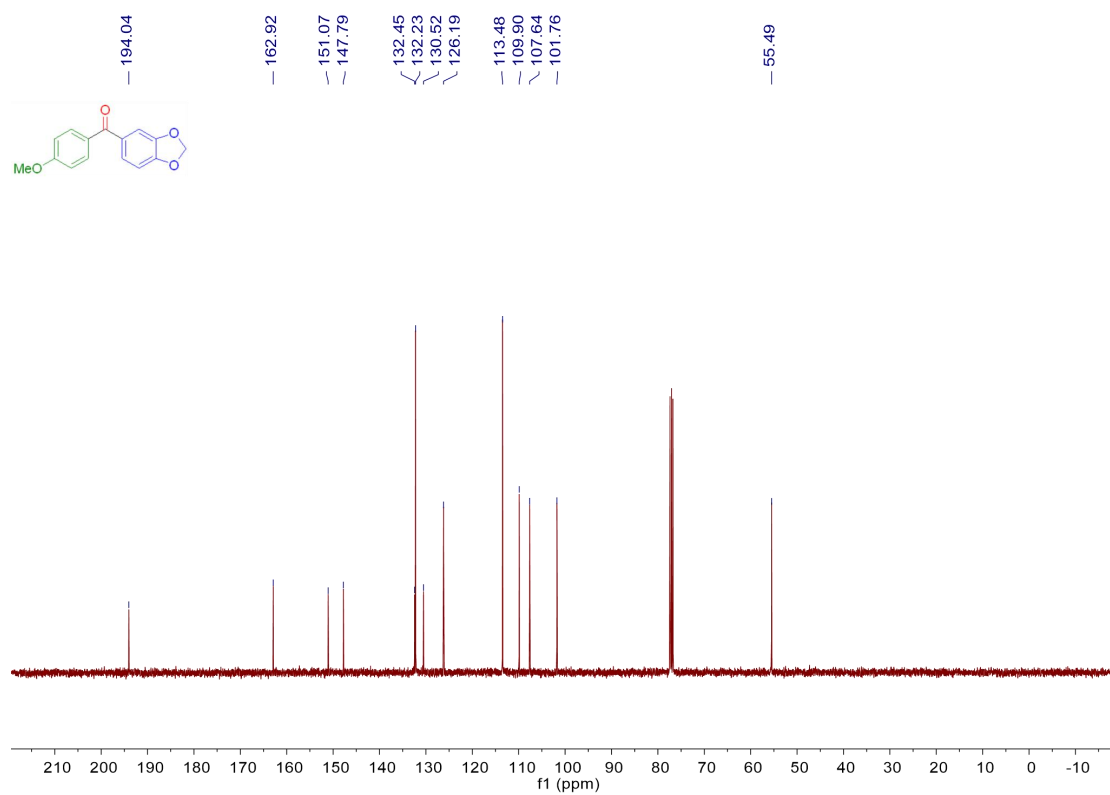

<sup>13</sup>C {<sup>1</sup>H} NMR (100 MHz, CDCl<sub>3</sub>) of **4aq**

(4-(9H-carbazol-9-yl)phenyl)(4-methoxyphenyl)methanone (**4ar**)

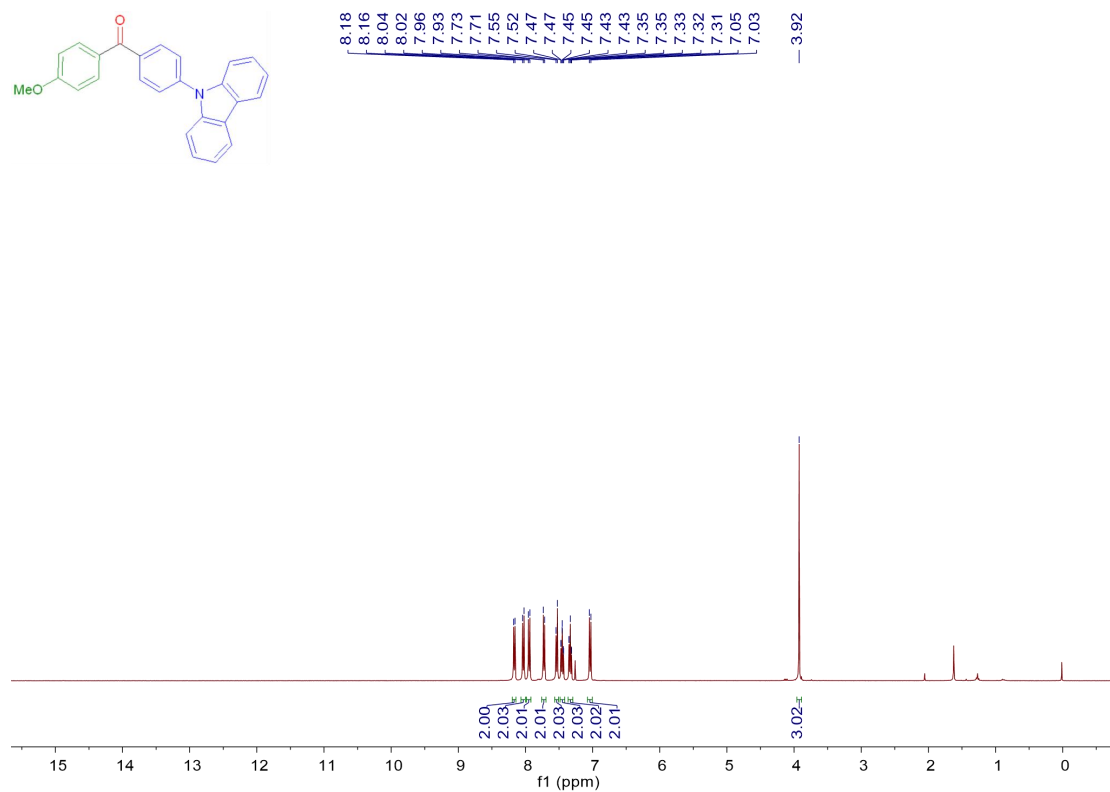

<sup>1</sup>H-NMR (400 MHz, CDCl<sub>3</sub>) of **4ar**

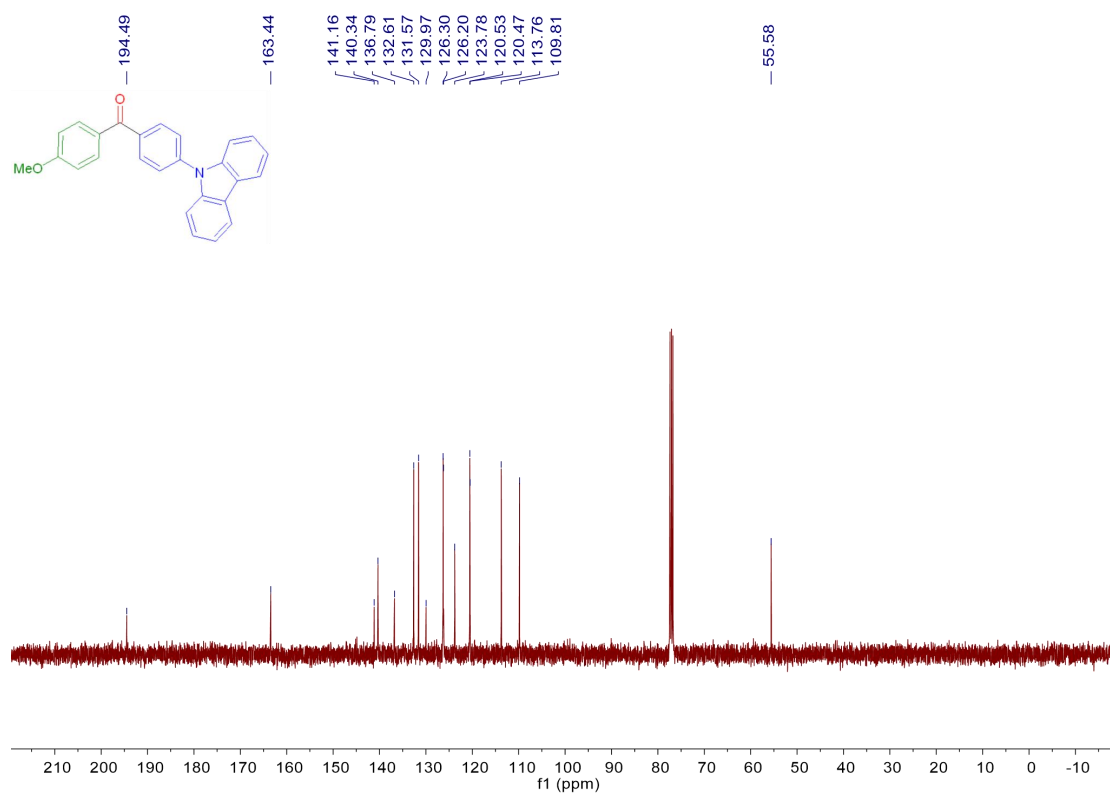

<sup>13</sup>C {<sup>1</sup>H} NMR (100 MHz, CDCl<sub>3</sub>) of **4ar**

(4-methoxyphenyl)(1-methyl-1H-indol-5-yl)methanone (**4as**)

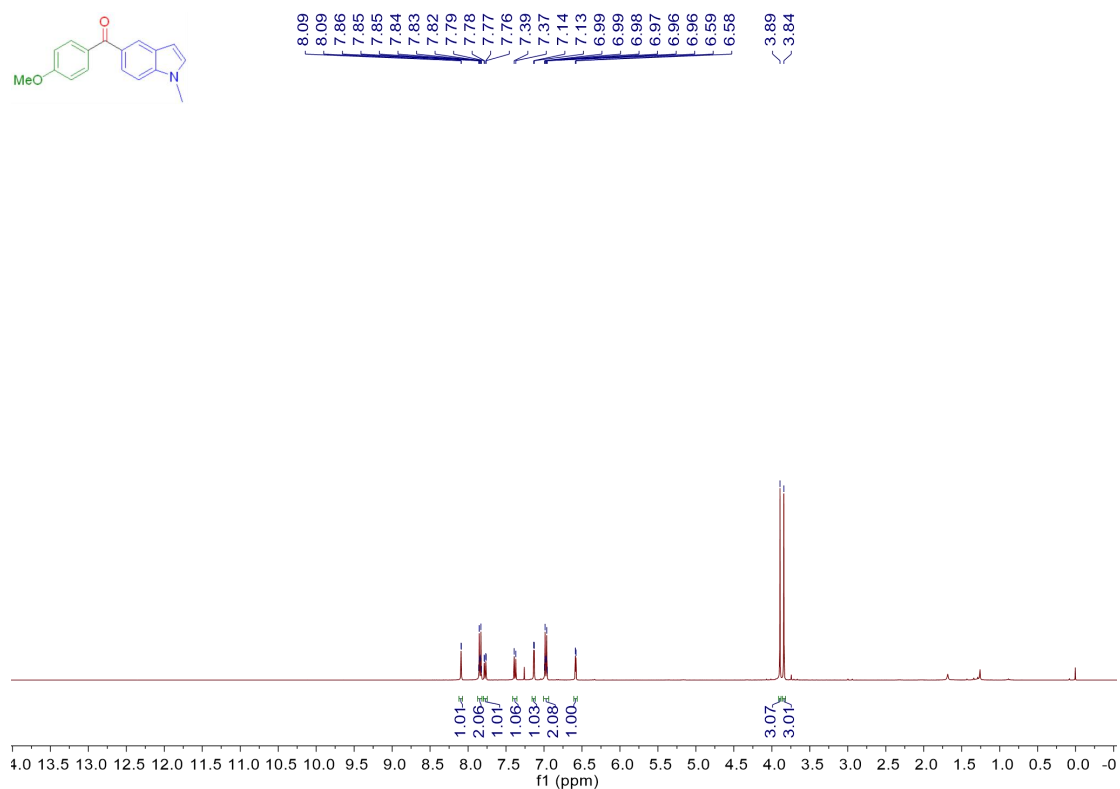

<sup>1</sup>H-NMR (400 MHz, CDCl<sub>3</sub>) of **4as**

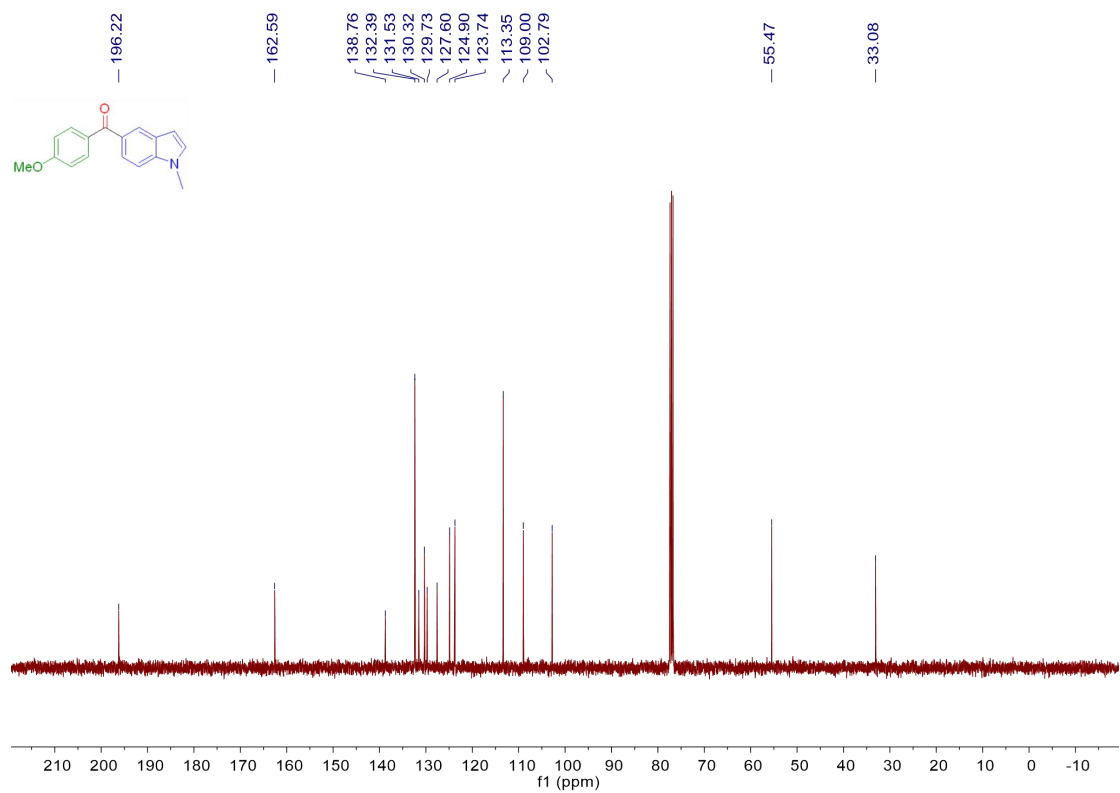

<sup>13</sup>C {<sup>1</sup>H} NMR (100 MHz, CDCl<sub>3</sub>) of **4as**

(4-methoxyphenyl)(thiophen-3-yl)methanone (**4at**)

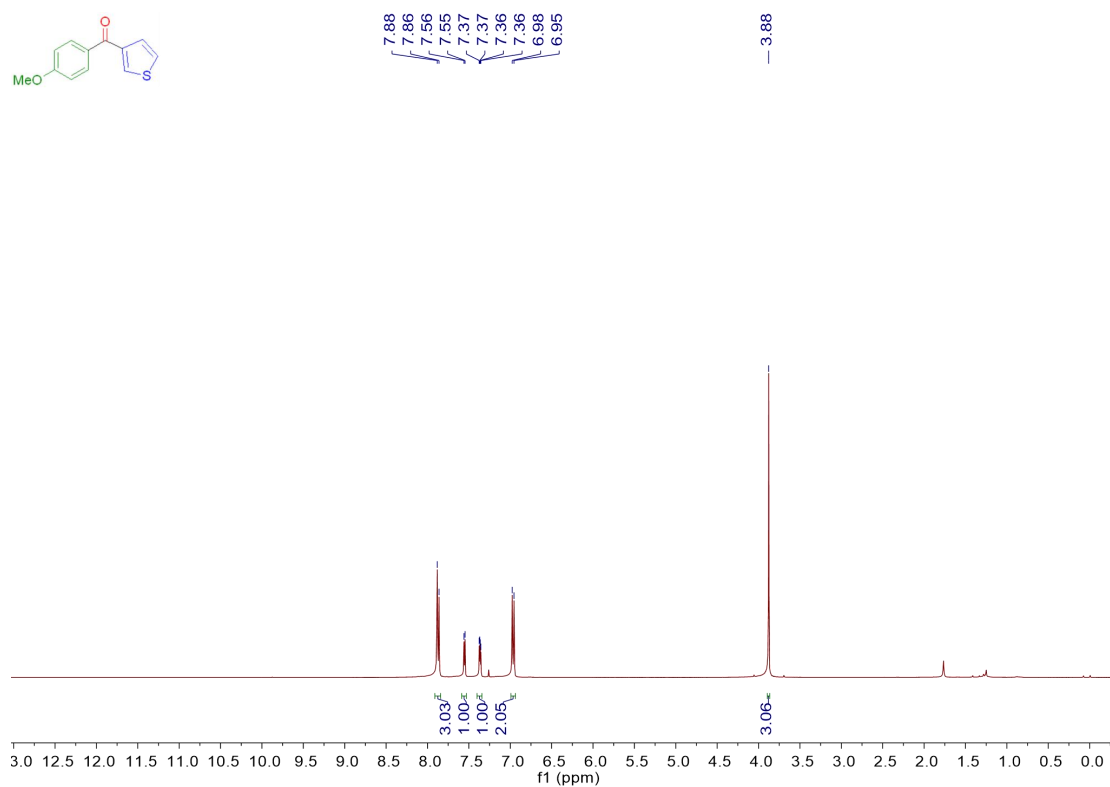

<sup>1</sup>H-NMR (400 MHz, CDCl<sub>3</sub>) of **4at**

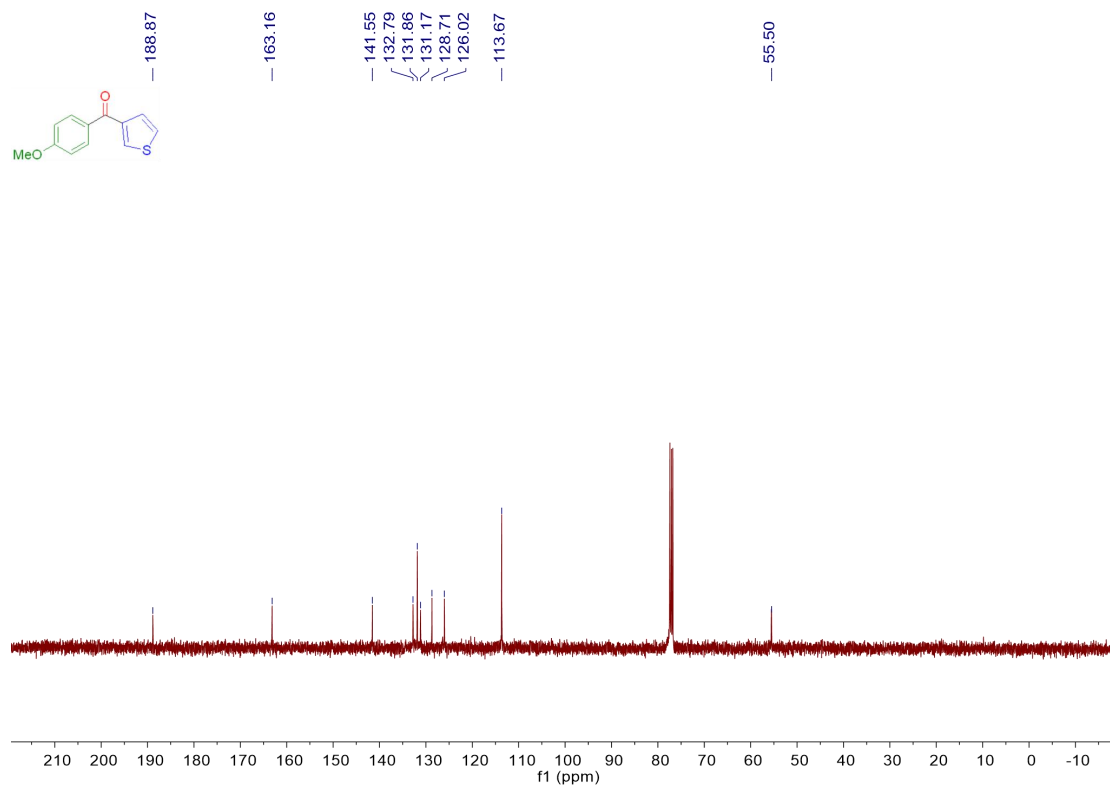

<sup>13</sup>C {<sup>1</sup>H} NMR (100 MHz, CDCl<sub>3</sub>) of **4at**

furan-3-yl(4-methoxyphenyl)methanone (**4au**)

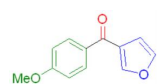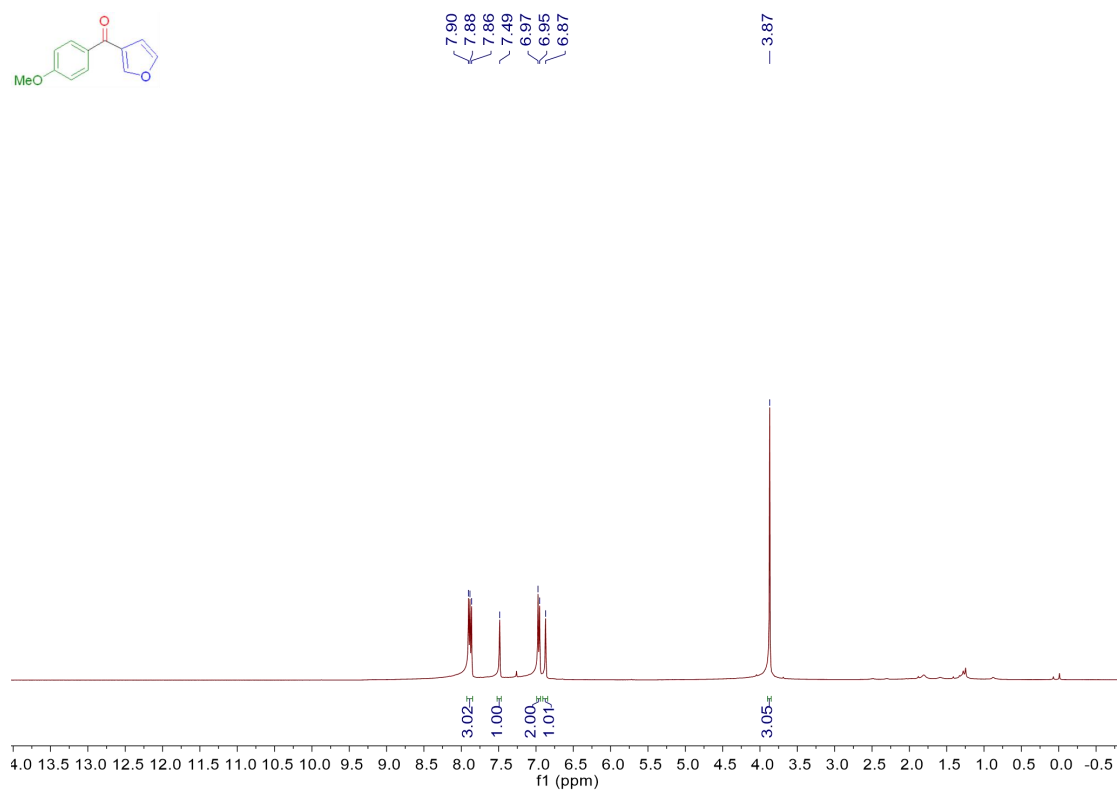

<sup>1</sup>H-NMR (400 MHz, CDCl<sub>3</sub>) of **4au**

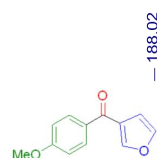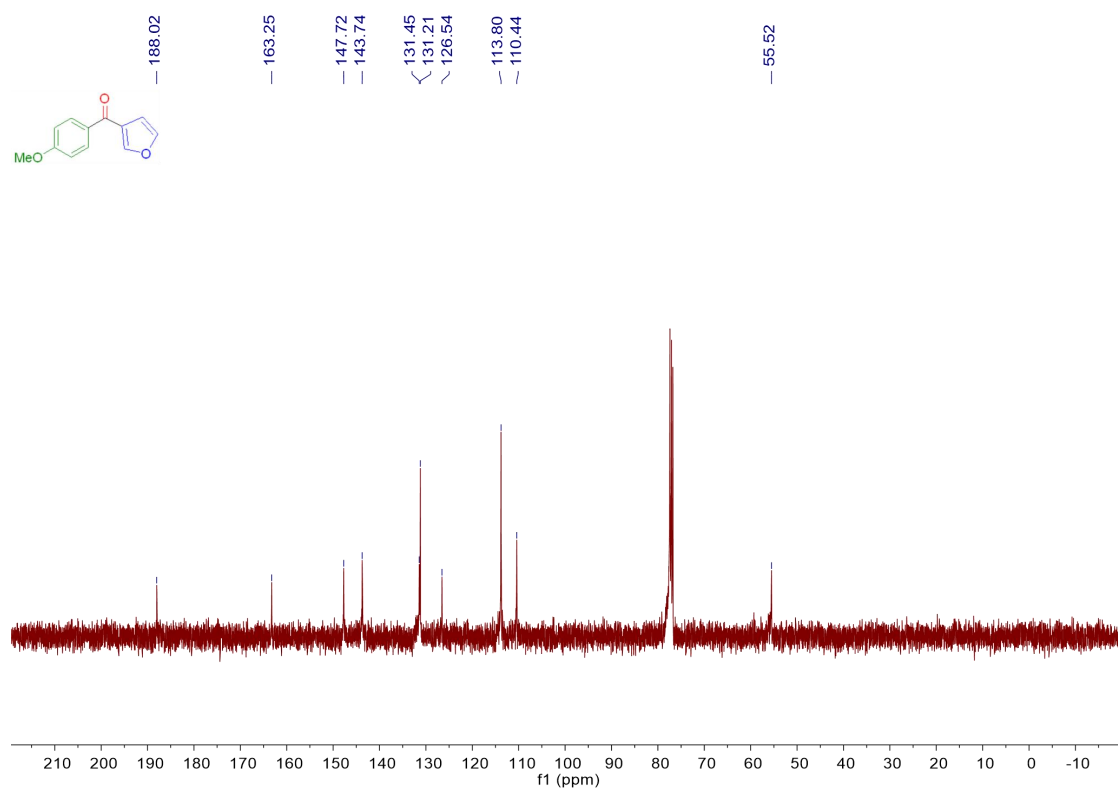

<sup>13</sup>C {<sup>1</sup>H} NMR (100 MHz, CDCl<sub>3</sub>) of **4au**



# Naphthylphenstatin (7)

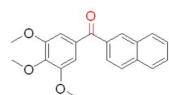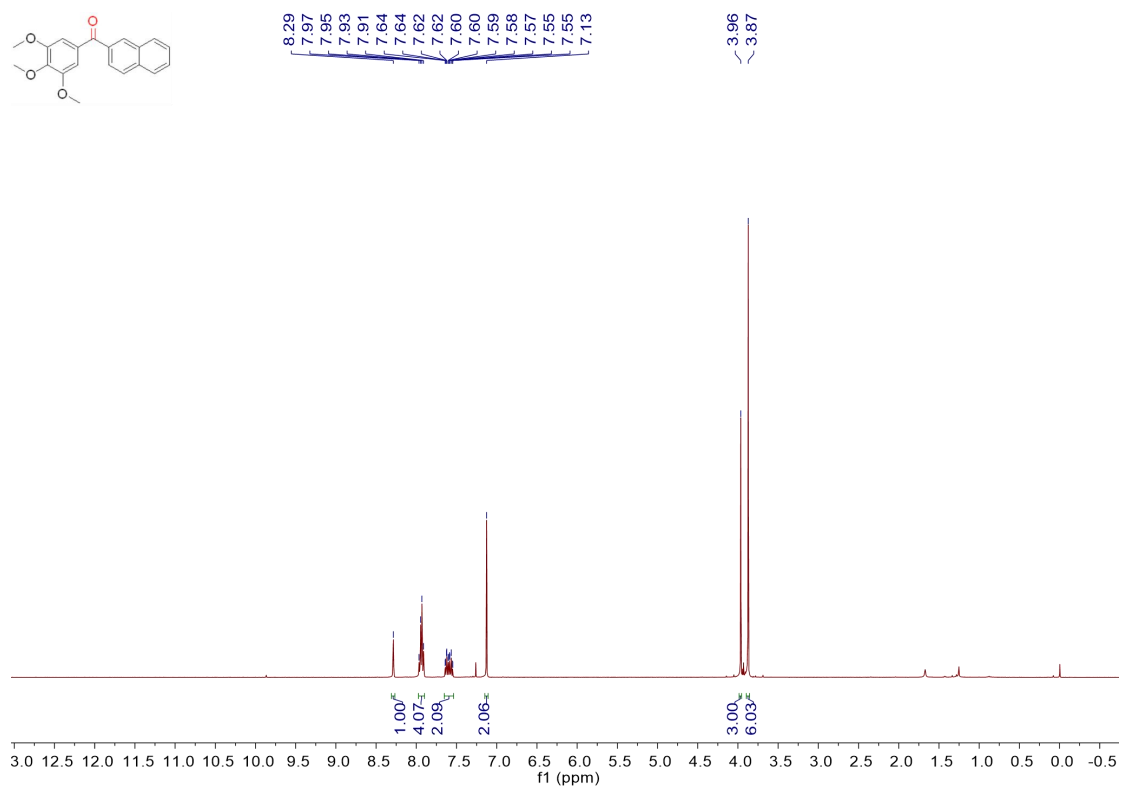

## $^1\text{H-NMR}$ (400 MHz, $\text{CDCl}_3$ ) of 7

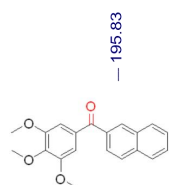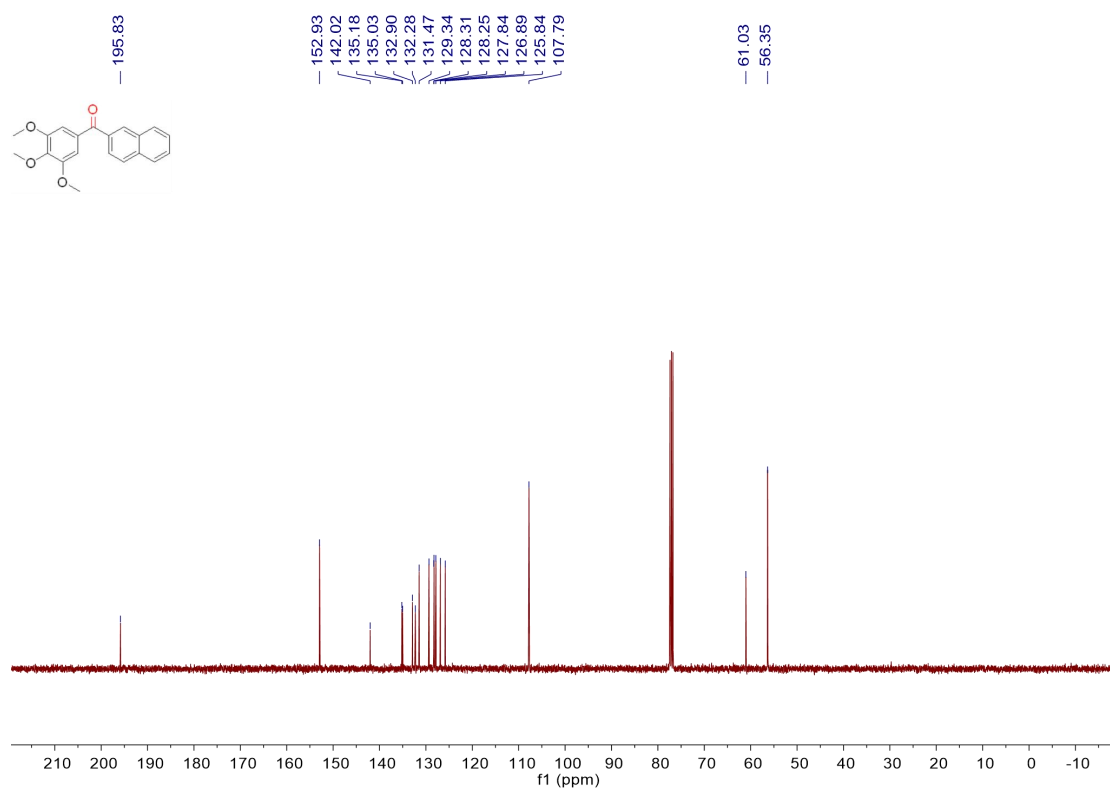

## $^{13}\text{C} \{^1\text{H}\}$ NMR (100 MHz, $\text{CDCl}_3$ ) of 7

Fenofibrate (10)

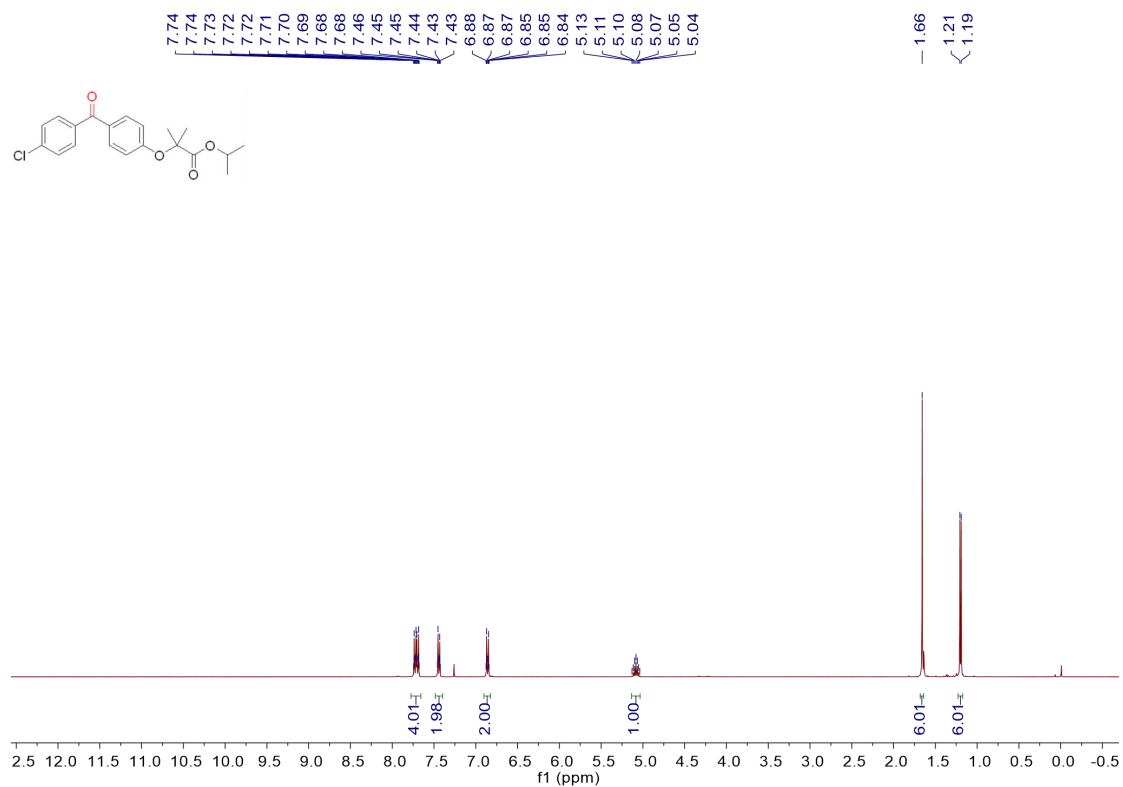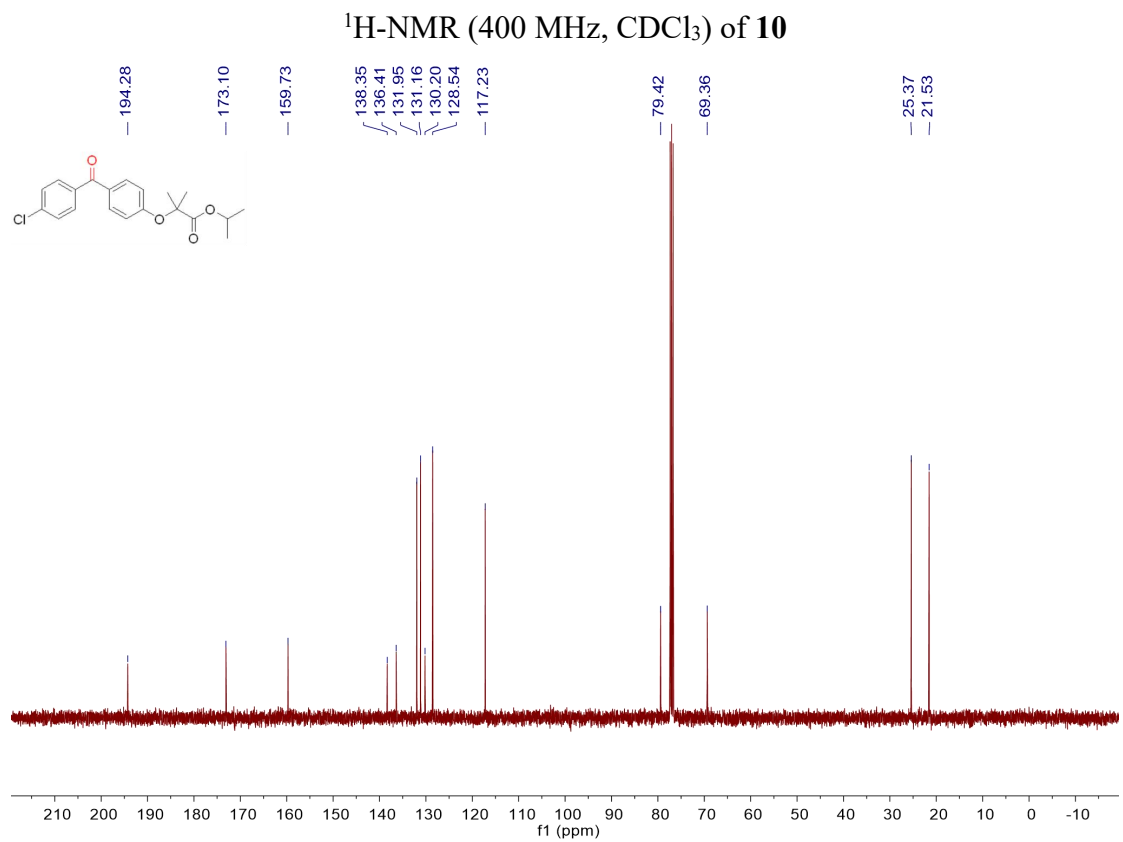

## 2-benzoylbenzaldehyde (**4av**)

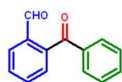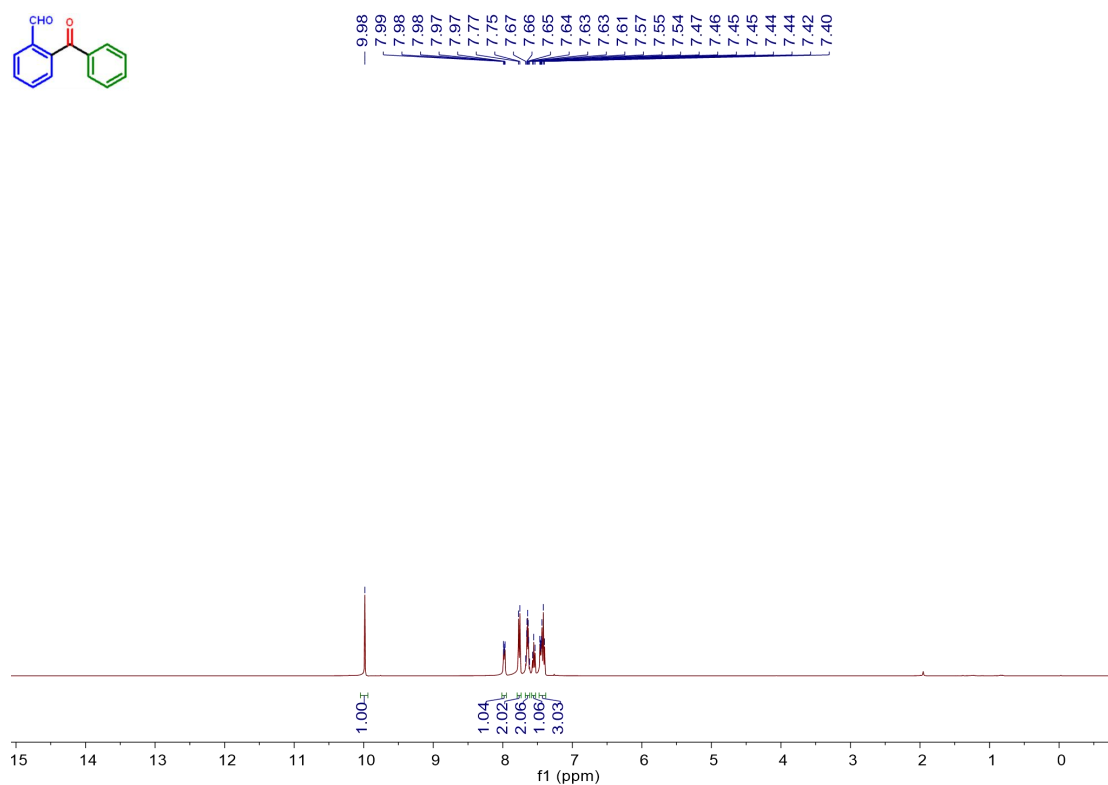

## $^1\text{H-NMR}$ (400 MHz, $\text{CDCl}_3$ ) of **4av**

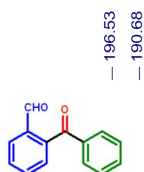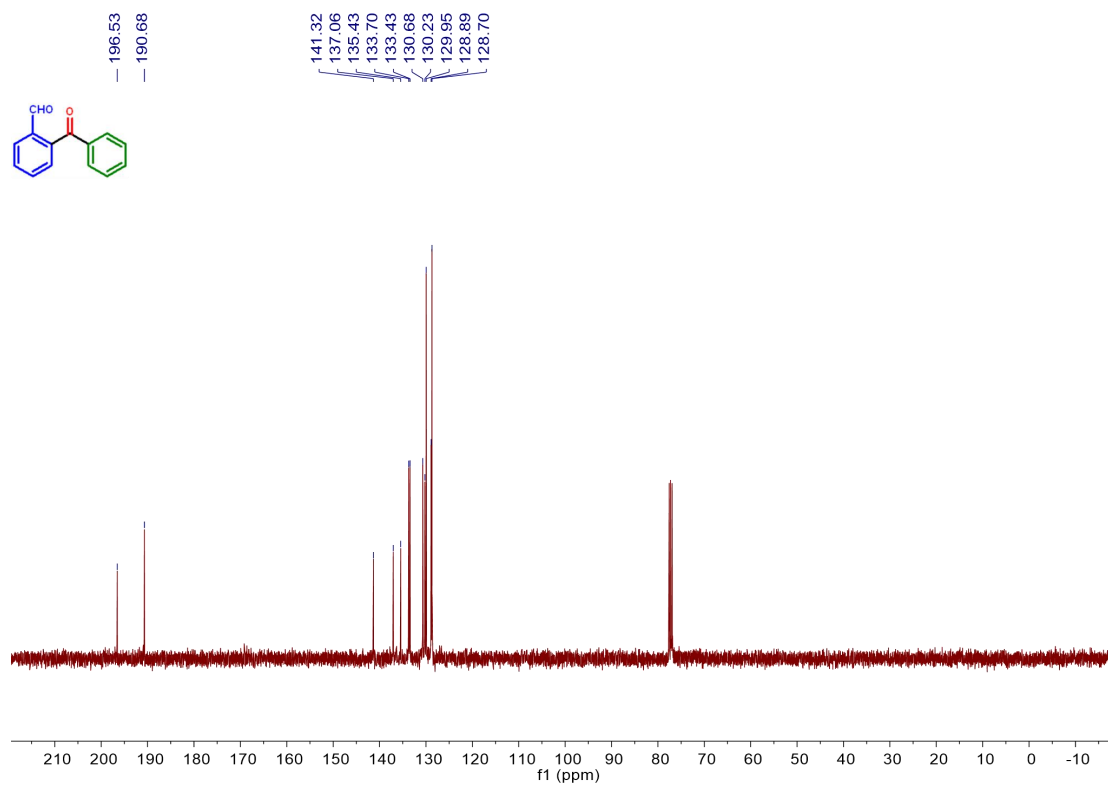

## $^{13}\text{C}$ $\{^1\text{H}\}$ NMR (100 MHz, $\text{CDCl}_3$ ) of **4av**

# 11-(1H-indol-3-yl)-6-phenyl-5H-benzo[b]carbazole (**4av-1**)

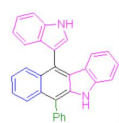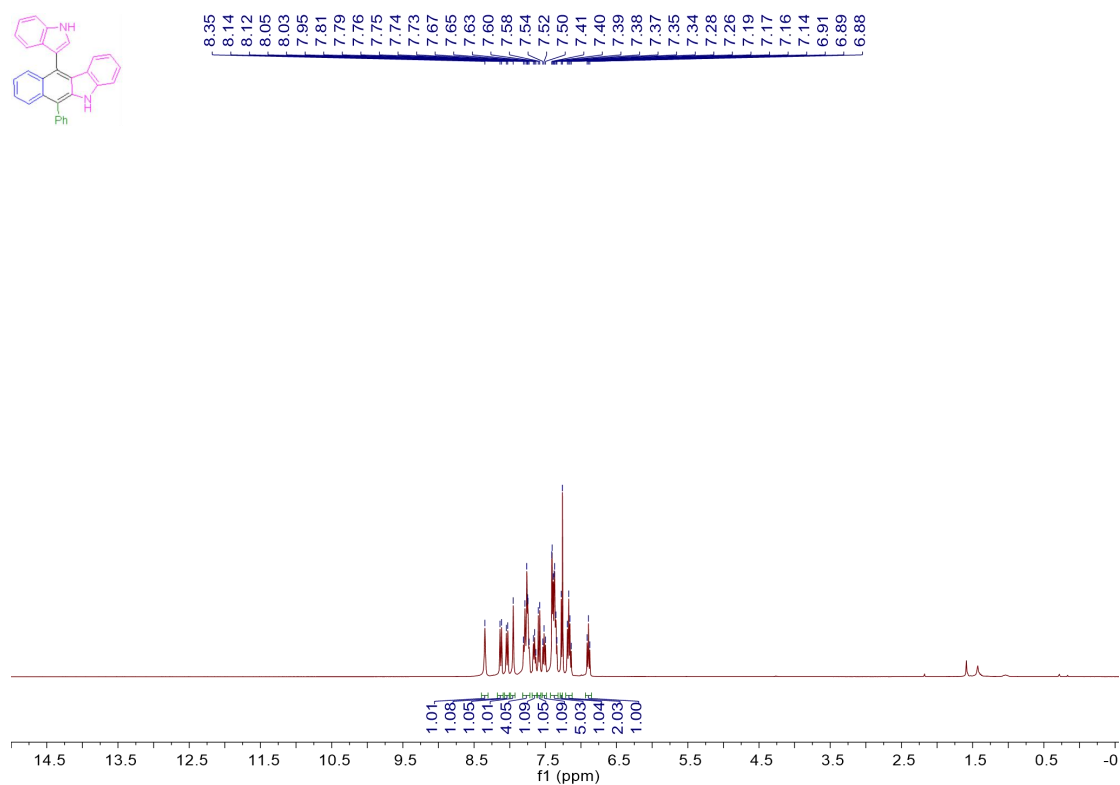

## <sup>1</sup>H-NMR (400 MHz, CDCl<sub>3</sub>) of **4av-1**

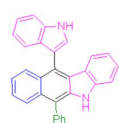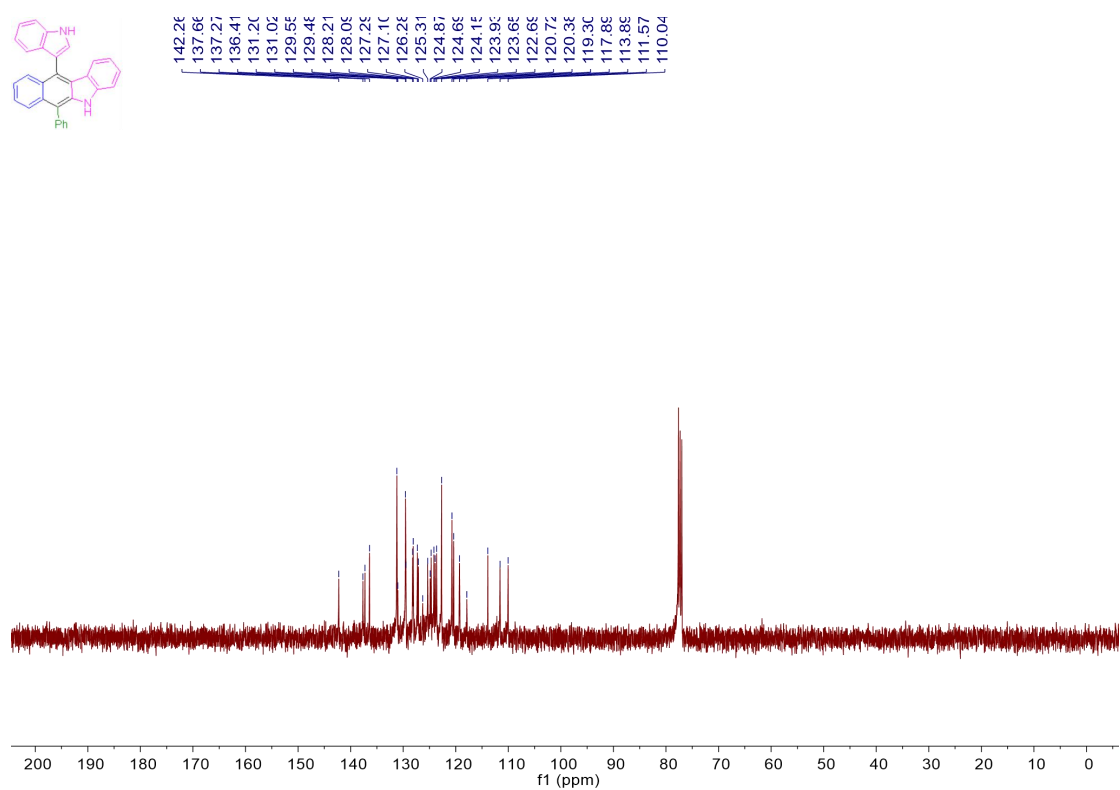

## <sup>13</sup>C {<sup>1</sup>H} NMR (100 MHz, CDCl<sub>3</sub>) of **4av-1**

# 1-phenylphthalazine (**4av-2**)

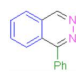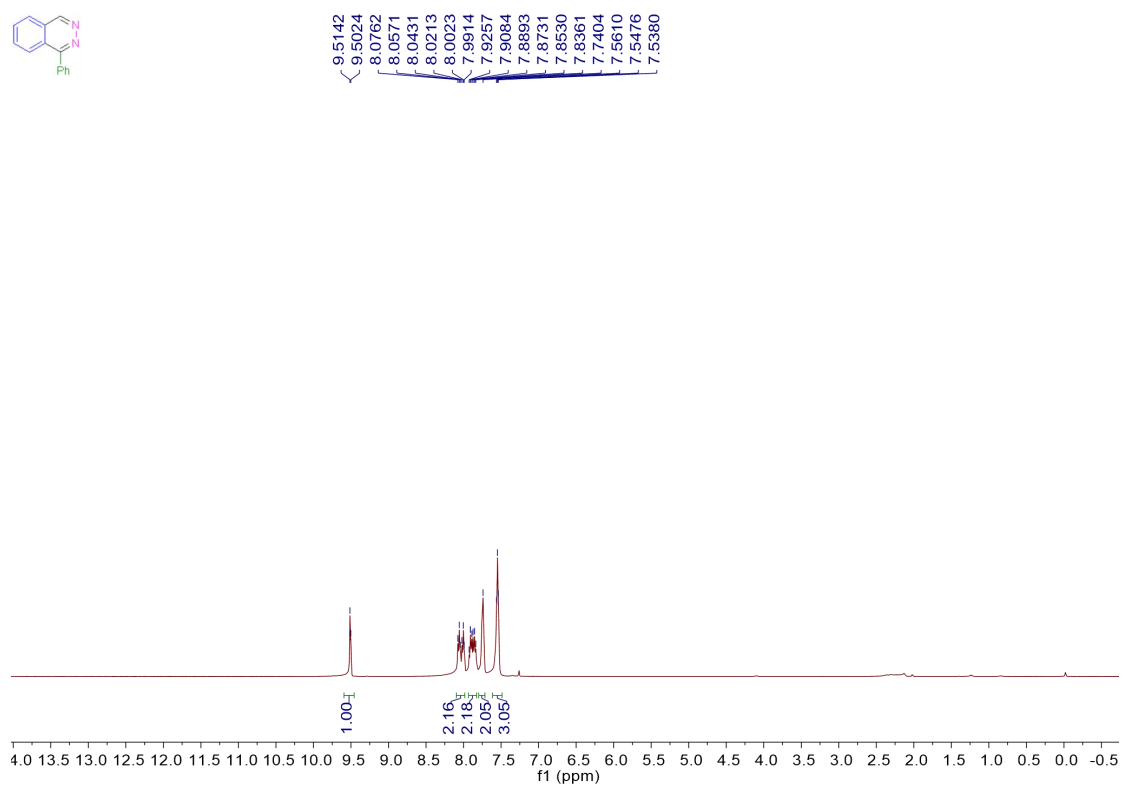

## $^1\text{H-NMR}$ (400 MHz, $\text{CDCl}_3$ ) of **4av-2**

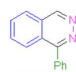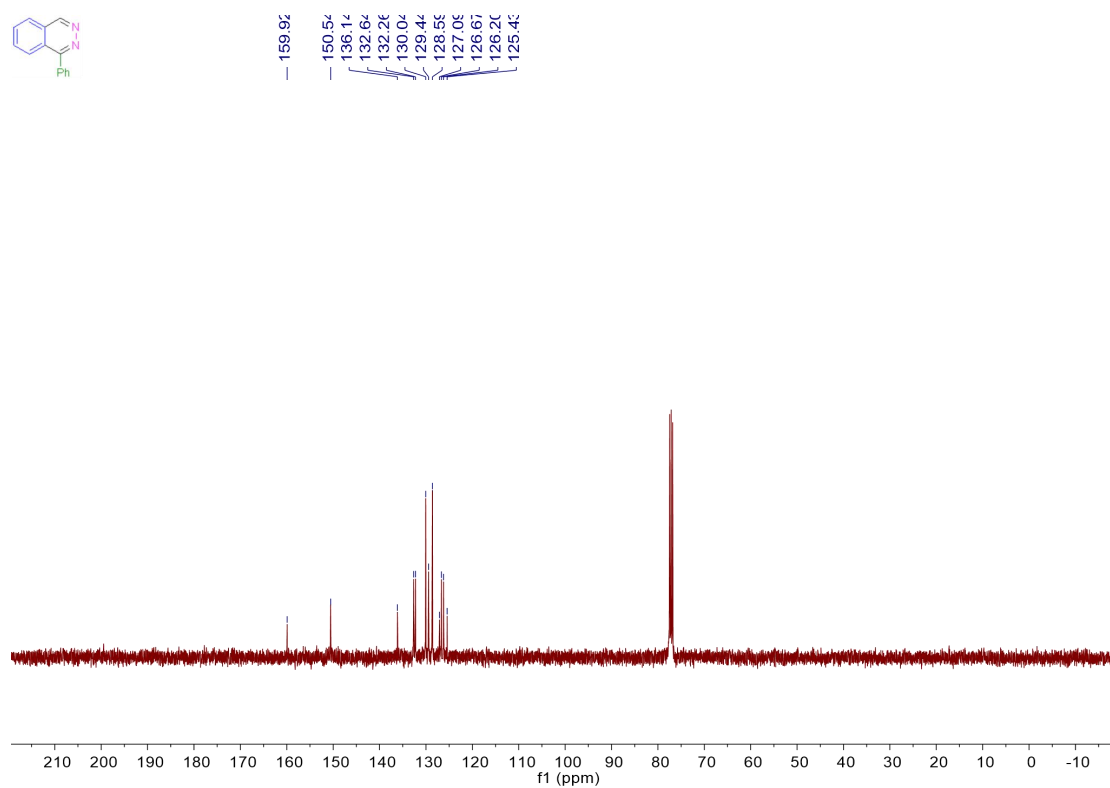

## $^{13}\text{C}$ $\{^1\text{H}\}$ NMR (100 MHz, $\text{CDCl}_3$ ) of **4av-2**

### 3,4-diphenylisoquinoline (**4av-3**)

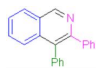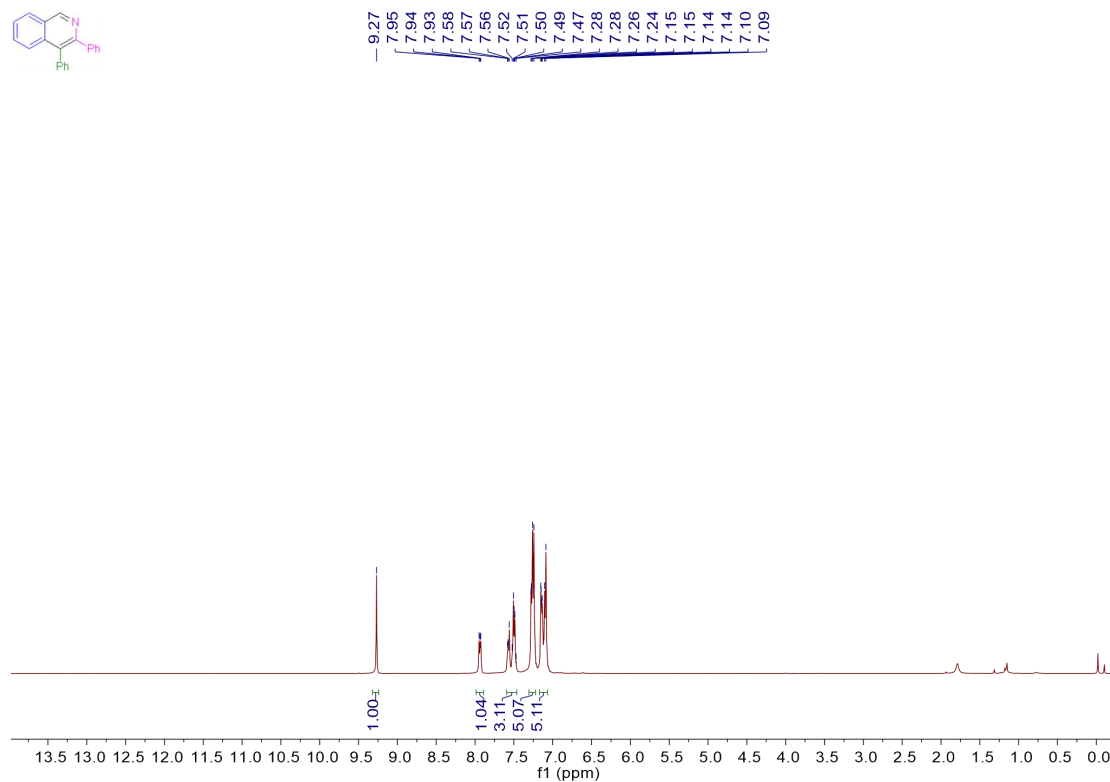

### $^1\text{H-NMR}$ (400 MHz, $\text{CDCl}_3$ ) of **4av-3**

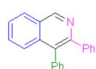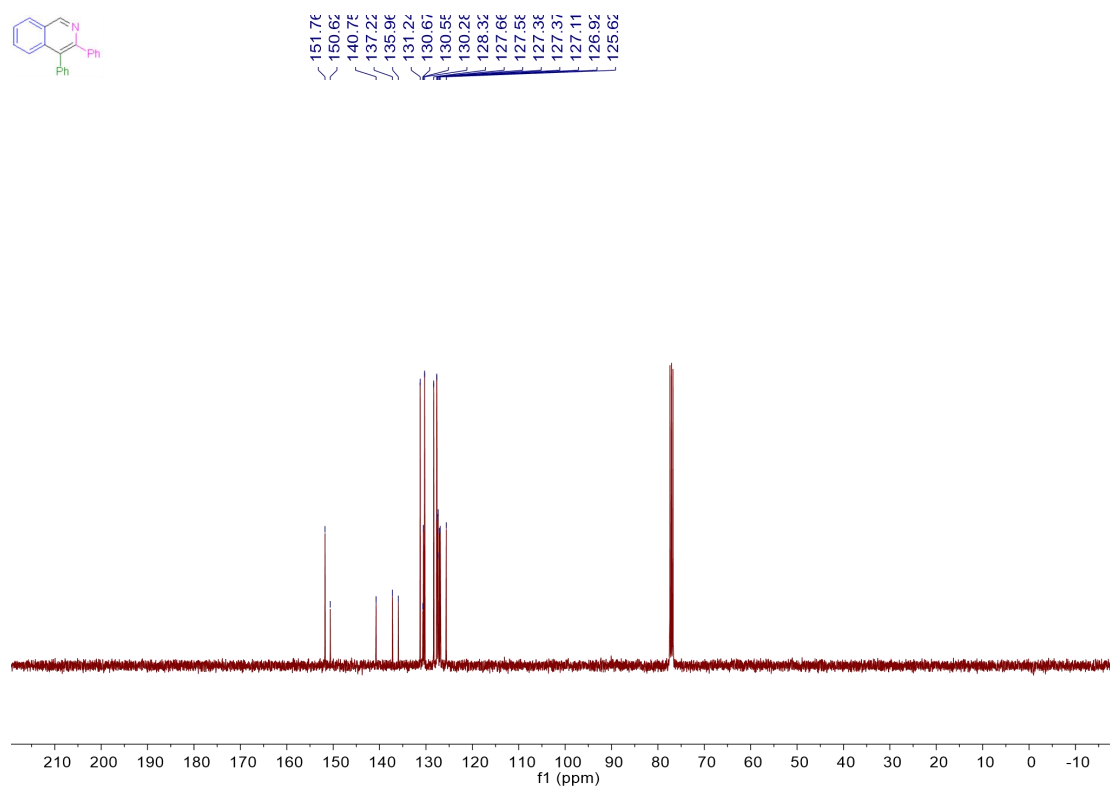

### $^{13}\text{C}$ $\{^1\text{H}\}$ NMR (100 MHz, $\text{CDCl}_3$ ) of **4av-3**

2-benzyl-3-phenylisoindolin-1-one (**4av-4**)

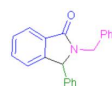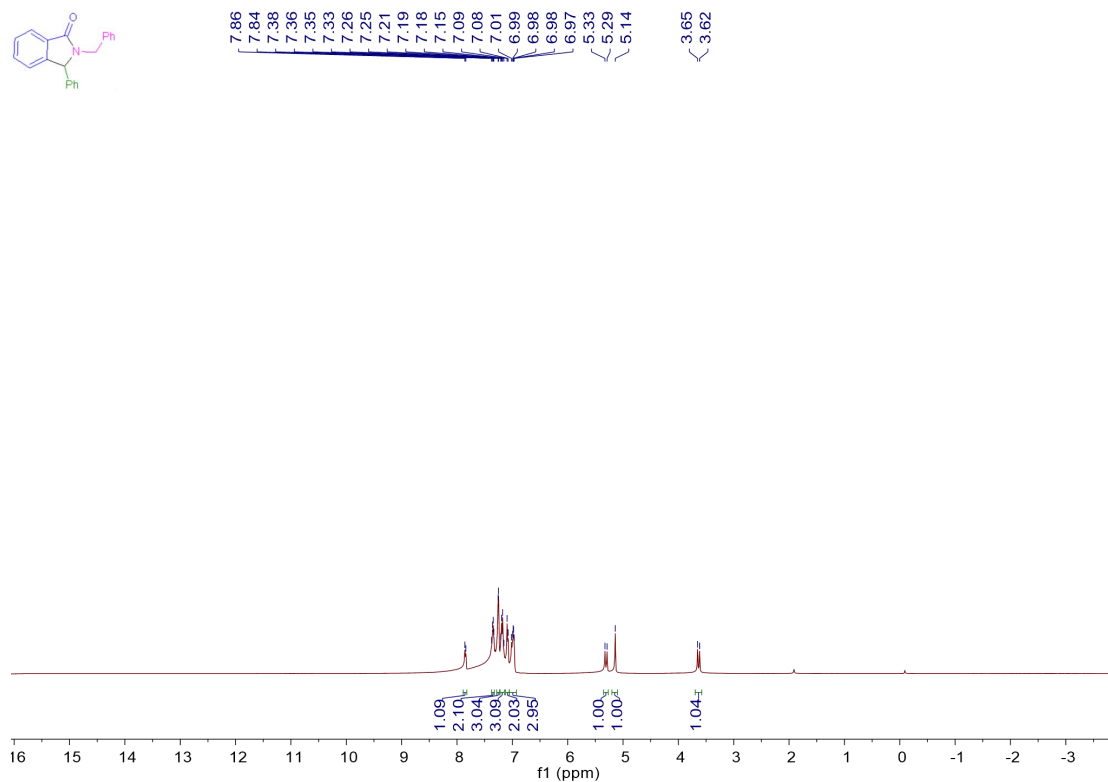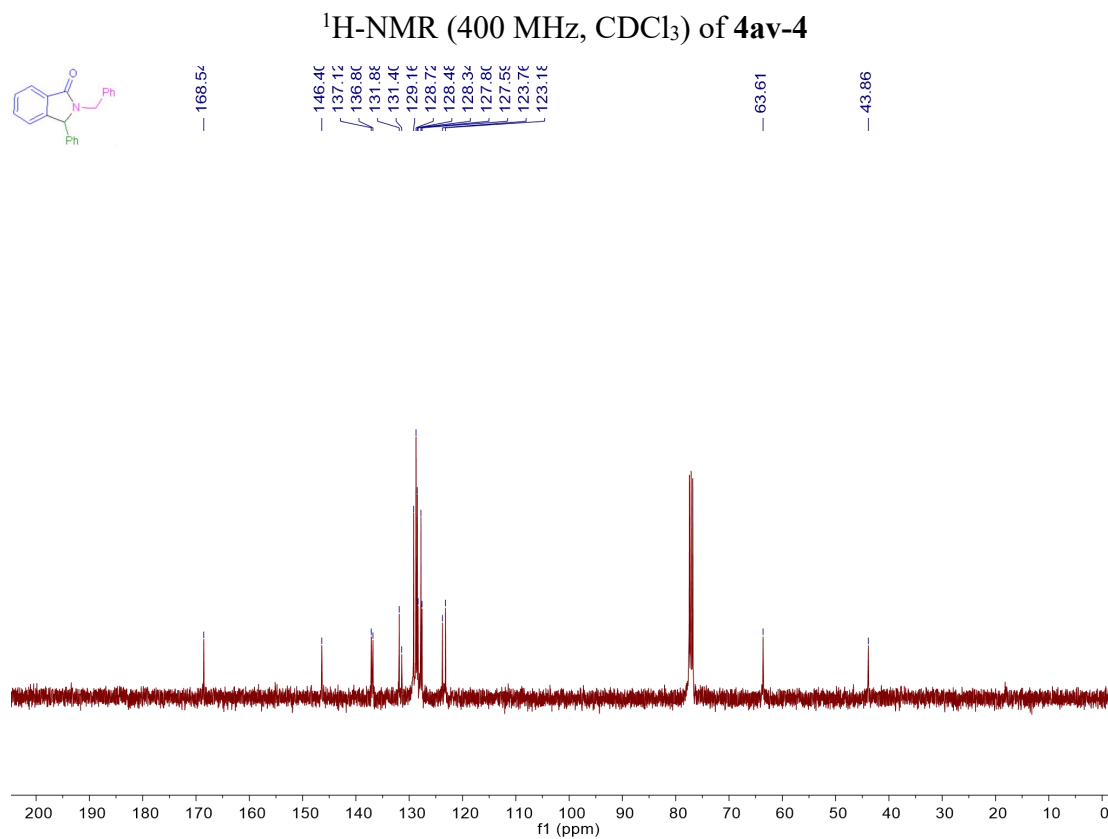

### 1,3-diphenylisobenzofuran (**4av-5**)

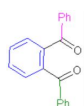

7.77  
7.75  
7.66  
7.58  
7.56  
7.54  
7.44  
7.42  
7.40

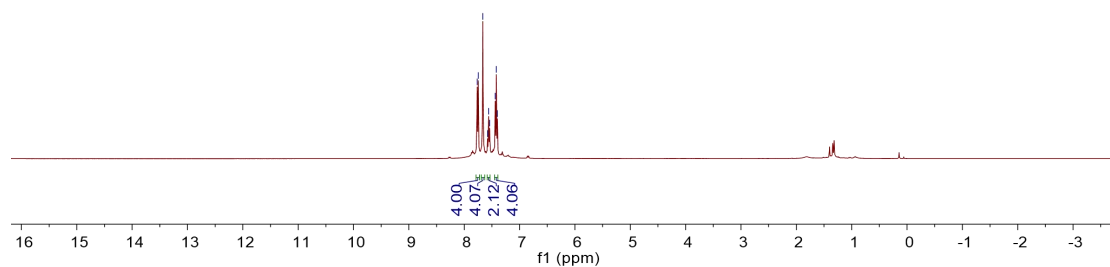

### <sup>1</sup>H-NMR (400 MHz, CDCl<sub>3</sub>) of **4av-5**

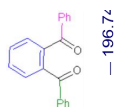

196.74

140.13  
137.31  
133.14  
130.52  
129.92  
128.78  
128.46

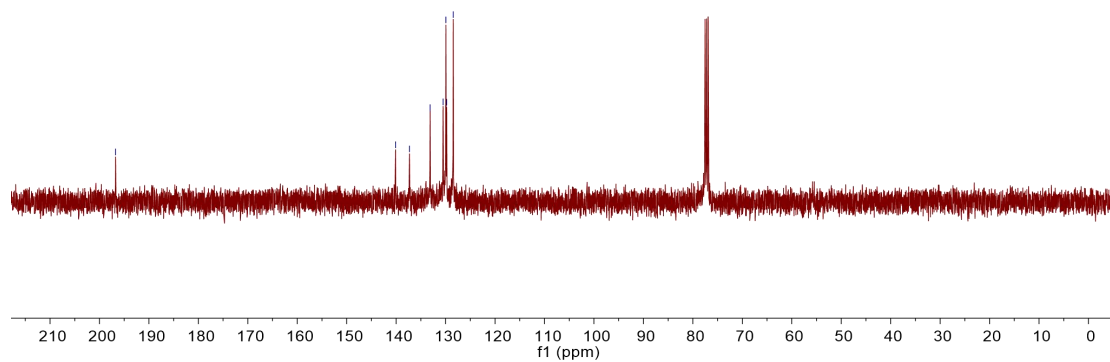

### <sup>13</sup>C {<sup>1</sup>H} NMR (100 MHz, CDCl<sub>3</sub>) of **4av-5**



## SI- § 8 Reference

1. Xuan, G.-R.; Chen, X.-K.; Liu, M.-C.; Zhou, Y.-B.; Wu, H.-Y., Deselenylative Acylation and Nitration of Monoselenides. *Org. Lett.* **2024**, *26*, 4756-4760.
2. Liu, X.; He, C.-Y.; Yin, H.-N.; Miao, C.; Chu, X.-Q.; Rao, W.; Xu, H.; Zhou, X.; Shen, Z.-L., Nickel-Catalyzed Cross-Electrophile Coupling of Triazine Esters with Aryl Bromides. *Chin. J. Chem.*, **2023**, *41*, 3539-3546.
3. Song, B.; Rudolphi, F.; Himmler, T.; Gooßen, L. J., Practical Synthesis of 2-Arylacetic Acid Esters via Palladium- Catalyzed Dealkoxycarbonylative Coupling of Malonates with Aryl Halides. *Adv. Synth. Catal.*, **2011**, *353*, 1565-1574.
4. Tang, S.; Wang, S.; Zhang, D.; Zhang, X.; Yang, G.; Wang, Y.; Qiu, Y., Selective nickel-electrocatalyzed benzylic C–H oxygenation of functionalized alkyl arenes. *Chin. Chem. Lett.* **2024**, *35*, 108660.
5. Supranovich, V. I.; Levin, V. V.; Dilman, A. D., One-Step Transformation of Aryl Diazonium Salts into Aryl Indium(III) Reagents. *Org. Lett.* **2024**, *26*, 4537-4541.
6. Zhang, K.; Yao, Y.; Sun, H.; Zhang, W.; Gao, Z., Triazine-wingtips accelerated NHC-Pd catalysed carbonylative Suzuki cross-coupling reaction. *J. Organomet. Chem.* **2024**, *1015*, 123181.
7. Huang, J.; Yan, X.; Xia, Y., Directing Group-Free Formal Suzuki–Miyaura Coupling of Simple Ketones Enabled by Activation of Unstrained C–C Bonds. *Angew. Chem. Int. Ed.* **2022**, *61*, e202211080.
8. Zhang, J.; Du, J.; Zhang, C.; Liu, K.; Yu, F.; Yuan, Y.; Duan, B.; Liu, R., Selective Oxidation of Alkylarenes to the Aromatic Ketones or Benzaldehydes with Water. *Org. Lett.* **2022**, *24*, 1152-1157.
9. Yu, C.; Huang, R.; Patureau, F. W., Direct Dehydrogenative Access to Unsymmetrical Phenones. *A Angew. Chem. Int. Ed.* **2022**, *61*, e202201142.
10. Zhou, J.; Ye, J.; Zhang, Y.; Li, Z.; Li, J.; Liu, D.; Zhang, W., Synthesis of Chiral Diaryl Methanols via RuPHOX-Ru Catalyzed Asymmetric Hydrogenation. *Adv. Synth. Catal.* **2023**, *365*, 1275-1286.
11. Martins, B. S.; Kaiser, D.; Bauer, A.; Tiefenbrunner, I.; Maulide, N., Formal Enone

- $\alpha$ -Arylation via I(III)-Mediated Aryl Migration/Elimination. *Org. Lett.* **2021**, *23*, 2094-2098.
12. Adebomi, V.; Wang, Y.; Sriram, M.; Raj, M., Selective Conversion of Unactivated C–N Amide Bond to C–C bond via Steric and Electronic Resonance Destabilization. *Org. Lett.* **2022**, *24*, 6525-6530.
  13. Li, X.; Xu, J.; Li, Y.; Kramer, S.; Skrydstrup, T.; Lian, Z., Silylcarboxylic Acids as Bifunctional Reagents: Application in Palladium-Catalyzed External-CO-Free Carbonylative Cross-Coupling Reactions. *Adv. Synth. Catal.* **2020**, *362*, 4078-4083.
  14. Lee, D.; Ryu, T.; Park, Y.; Lee, P. H., Unmasked Acyl Anion Equivalent from Acid Chloride with Indium: Reversed-Polarity Synthesis of Unsymmetric Aryl Aryl and Alkenyl Aryl Ketone through Palladium-Catalyzed Cross-Coupling Reaction. *Org. Lett.* **2014**, *16*, 1144-1147.
  15. Lin, S.-C. A.; Su, B.-K.; Liu, Y.-H.; Peng, S.-M.; Liu, S.-T., Tetra- and Dinuclear Palladium Complexes Based on a Ligand of 2,8-Di-2-pyridinylanthridine: Preparation, Characterization, and Catalytic Activity. *Organometallics* **2021**, *40*, 2081-2089.
  16. Kubo, K.; Ohyama, S.-i.; Shimizu, T.; Takami, A.; Murooka, H.; Nishitoba, T.; Kato, S.; Yagi, M.; Kobayashi, Y.; Iinuma, N.; Isoe, T.; Nakamura, K.; Iijima, H.; Osawa, T.; Izawa, T., Synthesis and structure–activity relationship for new series of 4-Phenoxyquinoline derivatives as specific inhibitors of platelet-derived growth factor receptor tyrosine kinase. *Bioorg. Med. Chem.* **2003**, *11*, 5117-5133.
  17. Rappoport, Z.; Greenblatt, J.; Apeloig, Y., 1,10-, 1,4-, and 1,2-Eliminations and 1,5- and 1,7-rearrangements in the reactions of substituted 9-anisylidene-9,10-dihydroanthracenes and anthrones in acetic acid. *J. Org. Chem.* **1979**, *44*, 3687-3694.
  18. Gautam, P.; Dhiman, M.; Polshettiwar, V.; Bhanage, B. M., KCC-1 supported palladium nanoparticles as an efficient and sustainable nanocatalyst for carbonylative Suzuki–Miyaura cross-coupling. *Green Chem.* **2016**, *18*, 5890-5899.
  19. Kim, H.; Park, S.; Baek, Y.; Um, K.; Han, G. U.; Jeon, D.-H.; Han, S. H.; Lee, P. H., Synthesis of Diaryl Ketones through Oxidative Cleavage of the C–C Double Bonds in N-Sulfonyl Enamides. *J. Org. Chem.* **2018**, *83*, 3486-3496.
  20. Huang, P.-Q.; Chen, H., Ni-Catalyzed cross-coupling reactions of N-acylpyrrole-type amides with organoboron reagents. *Chem. Commun.* **2017**, *53*, 12584-12587.

21. Zhang, J.; Zhang, P.; Ma, Y.; Szostak, M., Mechanochemical Synthesis of Ketones via Chemoselective Suzuki–Miyaura Cross-Coupling of Acyl Chlorides. *Org. Lett.* **2022**, *24*, 2338-2343.
22. Lutter, F. H.; Grokenberger, L.; Hofmayer, M. S.; Knochel, P., Cobalt-catalyzed acylation-reactions of (hetero)arylzinc pivalates with thiopyridyl ester derivatives. *Chem. Sci.* **2019**, *10*, 8241-8245.
23. Preis, E.; Dong, W.; Brunklaus, G.; Scherf, U., Microporous, tetraarylethylene-based polymer networks generated in a reductive polyolefination process. *J. Mater. Chem. C* **2015**, *3*, 1582-1587.
24. Suresh, S.; Kavala, V.; Yao, C.-F., Iodine-Catalyzed Annulation Reaction of Ortho-Formylarylketones with Indoles: A General Strategy for the Synthesis of Indolylbenzo[b]carbazoles. *J. Org. Chem.* **2023**, *88*, 3666-3677.
25. Hadsarung, R.; Thongnest, S.; Oekchuae, S.; Chaiyaveij, D.; Boonsombat, J.; Ruchirawat, S., Facile synthesis of 1-substituted 4-H phthalazine, a versatile scaffold for chemically diverse phthalazines. *Tetrahedron* **2022**, *121*, 132920.
26. Mishra, P. K.; Verma, S.; Kumar, M.; Kumar, A.; Verma, A. K., Harnessing the reactivity of ortho-formyl-arylketones: base-promoted regiospecific synthesis of functionalized isoquinolines. *Chem. Commun.* **2019**, *55*, 8278-8281.
27. Tang, W.-X.; Chen, K.-Q.; Sun, D.-Q.; Chen, X.-Y., Photoinduced halogen-bonding enabled synthesis of oxindoles and isoindolinones from aryl iodides. *Org. Biomol. Chem.* **2023**, *21*, 715-718.
28. Lian, P.; Wang, K.; Liu, H.; Li, R.; Li, M.; Bao, X.; Wan, X., Reacting Molecular Oxygen with Butanone under Visible Light Irradiation: A General Aerobic Oxidation of Alkenes, Sulfides, Phosphines, and Silanes. *Org. Lett.* **2023**, *25*, 7984-7989.
29. Deng, R.; Pan, M.; Liu, J.; Zheng, P.; Chi, Y. R., Carbene-Catalyzed Enantioselective Addition of Sulfinate to Ketones. *Org. Lett.* **2024**, *26*, 4394-4399.
